# Supplementary material for: Recent exposure to environmental stochasticity does not determine the resilience of natural populations
Source: bioRxiv or medRxiv preprint supplement (doi:10.1101/2022.04.28.489852), 2022-10-25
Supplement: Supplementary file [file media-1.pdf]

# Supplementary material: Evolutionary processes, not environmental drivers, determine the resilience of natural populations

James Cant, Pol Capdevila, Maria Beger, and Roberto Salguero-Gómez

## S1. Species List

**Table S1. A complete list of the 556 species for which data was extracted from the COMPADRE<sup>1</sup> & COMADRE<sup>2</sup> databases for this study. Entries are colour coded to distinguish each of the six algae (Grey), 112 animal (White), and 438 plant (Red) species extracted.** Each species is listed along with their corresponding realm classification (Terrestrial, Freshwater or Marine), the number of population replicates extracted initially, the number of population replicates retained in our final refined sample, and the original data source(s) (if provided). Population replicates dropped following initial extraction corresponded with either: (1) highly migratory species making it difficult to link demographic properties to the environment in which they were measured, or (2) Matrix Population Models (MPMs) exhibiting population growth rates  $>2$ , and/or (3) *reducible, non-ergodic* or *imprimitive* characteristics, and therefore representing untenable life cycles that defy logical biological processes.

|       | Species                         | Realm       | Extracted | Retained | Source |
|-------|---------------------------------|-------------|-----------|----------|--------|
| Grey  | <i>Ascophyllum nodosum</i>      | Marine      | 1         | 1        | 3,4    |
|       | <i>Cystoseira zosteroides</i>   | Marine      | 4         |          | 5      |
|       | <i>Gracilaria gracilis</i>      | Marine      | 8         | 8        | 6      |
|       | <i>Laminaria digitata</i>       | Marine      | 1         | 1        | 7      |
|       | <i>Macrocystis pyrifera</i>     | Marine      | 1         |          | 8      |
|       | <i>Pterygophora californica</i> | Marine      | 6         |          | 9      |
| White | <i>Alces alces</i>              | Terrestrial | 15        | 8        | 10–12  |
|       | <i>Alouatta seniculus</i>       | Terrestrial | 4         |          | 13     |
|       | <i>Amazona vittata</i>          | Terrestrial | 1         | 1        | 14     |

|                                    |             |    |    |       |
|------------------------------------|-------------|----|----|-------|
| <i>Ambloplites rupestris</i>       | Aquatic     | 3  |    |       |
| <i>Ammocrypta pellucida</i>        | Aquatic     | 1  | 1  | 15    |
| <i>Amphimedon compressa</i>        | Marine      | 2  |    | 16    |
| <i>Anser anser</i>                 | Terrestrial | 1  |    | 17    |
| <i>Anthropoides paradiseus</i>     | Terrestrial | 11 |    | 18    |
| <i>Astroblepus ubidiai</i>         | Aquatic     | 6  | 4  | 19    |
| <i>Bostrychia hagedash</i>         | Terrestrial | 1  | 1  | 20    |
| <i>Brachyteles hypoxanthus</i>     | Terrestrial | 25 | 25 | 21,22 |
| <i>Buteo solitarius</i>            | Terrestrial | 4  | 4  | 23    |
| <i>Calidris temminckii</i>         | Terrestrial | 2  |    | 24    |
| <i>Callorhinus ursinus</i>         | Marine      | 1  |    | 25    |
| <i>Callospermophilus lateralis</i> | Terrestrial | 18 | 7  | 26    |
| <i>Calyptorhynchus lathamii</i>    | Terrestrial | 2  |    | 27    |
| <i>Canis lupus</i>                 | Terrestrial | 1  | 1  | 28    |
| <i>Capra ibex</i>                  | Terrestrial | 4  |    | 29    |
| <i>Cardisoma guanhumii</i>         | Terrestrial | 3  | 3  |       |
| <i>Cebus capucinus</i>             | Terrestrial | 22 | 22 | 21,22 |
| <i>Cercopithecus mitis</i>         | Terrestrial | 28 | 28 | 21    |
| <i>Certhia americana</i>           | Terrestrial | 1  |    | 30    |
| <i>Cervus elaphus</i>              | Terrestrial | 3  |    | 31–33 |
| <i>Chelodina expansa</i>           | Aquatic     | 2  | 2  | 34    |
| <i>Chelydra serpentina</i>         | Aquatic     | 1  | 1  | 35,36 |
| <i>Chen caerulescens</i>           | Terrestrial | 6  |    | 37    |
| <i>Chrysemys picta</i>             | Aquatic     | 3  | 1  | 38–40 |
| <i>Cicindela ohlone</i>            | Terrestrial | 14 | 5  | 41    |
| <i>Colias alexandra</i>            | Terrestrial | 5  |    | 42    |
| <i>Connochaetes taurinus</i>       | Terrestrial | 2  |    | 43    |
| <i>Cottus bairdi</i>               | Aquatic     | 3  |    |       |
| <i>Crocodylus johnsoni</i>         | Aquatic     | 4  | 2  | 44    |
| <i>Crocodylus niloticus</i>        | Aquatic     | 2  |    | 45    |
| <i>Cryptophis nigrescens</i>       | Terrestrial | 1  | 1  | 46    |
| <i>Dasypus novemcinctus</i>        | Terrestrial | 3  | 3  | 47    |
| <i>Diadema antillarum</i>          | Marine      | 4  |    | 48    |
| <i>Dipodomys spectabilis</i>       | terrestrial | 2  | 1  | 49    |
| <i>Eidolon helvum</i>              | Terrestrial | 1  |    | 50    |
| <i>Elephas maximus</i>             | Terrestrial | 1  |    | 51    |
| <i>Emydura macquarii</i>           | Aquatic     | 2  | 2  | 34    |
| <i>Epidalea calamita</i>           | Aquatic     | 1  |    | 52    |
| <i>Epinephelus morio</i>           | Marine      | 1  |    | 53    |
| <i>Etheostoma flabellare</i>       | Aquatic     | 3  |    |       |
| <i>Eumetopias jubatus</i>          | Marine      | 1  |    | 54    |
| <i>Falco peregrinus</i>            | Terrestrial | 13 |    | 55    |
| <i>Fulmarus glacialis</i>          | Terrestrial | 1  | 1  | 56    |
| <i>Giraffa camelopardalis</i>      | Terrestrial | 4  | 4  | 57,58 |
| <i>Gorilla beringei</i>            | Terrestrial | 41 | 41 | 21,22 |
| <i>Haliaeetus albicilla</i>        | Terrestrial | 2  |    | 59    |

|                                         |             |    |    |        |
|-----------------------------------------|-------------|----|----|--------|
| <i>Homo sapiens</i>                     | Terrestrial | 26 |    |        |
| <i>Hoplocephalus bungaroides</i>        | Terrestrial | 1  | 1  | 46     |
| <i>Hystrix refossa</i>                  | Terrestrial | 1  |    | 60     |
| <i>Kinosternon subrubrum</i>            | Aquatic     | 3  | 3  | 61     |
| <i>Kobus ellipsiprymnus defassa</i>     | Terrestrial | 2  |    | 62     |
| <i>Lagopus muta</i>                     | Terrestrial | 1  | 1  | 63     |
| <i>Larus heermanni</i>                  | Terrestrial | 2  |    |        |
| <i>Leptonychotes weddellii</i>          | Marine      | 21 |    | 64     |
| <i>Macaca mulatta</i>                   | Terrestrial | 12 | 12 | 65–67  |
| <i>Malaclemys terrapin</i>              | Aquatic     | 1  | 1  | 68     |
| <i>Marmota flaviventris</i>             | Terrestrial | 2  | 2  | 69     |
| <i>Montastraea annularis</i>            | Marine      | 13 |    | 70–72  |
| <i>Nipponia nippon</i>                  | Terrestrial | 1  |    | 73     |
| <i>Nocomis leptocephalus</i>            | Aquatic     | 3  |    |        |
| <i>Nuttallia obscurata</i>              | Marine      | 2  | 1  | 74     |
| <i>Odocoileus virginianus</i>           | Terrestrial | 14 | 13 | 75     |
| <i>Oncorhynchus tshawytscha</i>         | Marine      | 5  |    | 76,77  |
| <i>Onychogalea fraenata</i>             | Terrestrial | 1  | 1  | 78     |
| <i>Ovis aries</i>                       | Terrestrial | 6  |    | 79     |
| <i>Ovis canadensis</i>                  | Terrestrial | 22 | 6  | 80–82  |
| <i>Pan troglodytes schweinfurthii</i>   | Terrestrial | 45 | 45 | 21     |
| <i>Panthera pardus</i>                  | Terrestrial | 1  | 1  | 83     |
| <i>Papio cynocephalus</i>               | Terrestrial | 37 | 37 | 21     |
| <i>Paramuricea clavata</i>              | Marine      | 11 | 10 | 84,85  |
| <i>Phoca vitulina</i>                   | Marine      | 1  |    | 86     |
| <i>Phoebastria immutabilis</i>          | Terrestrial | 1  | 1  | 87     |
| <i>Phrynosoma cornutum</i>              | Terrestrial | 2  | 2  | 88     |
| <i>Plexaura sp.</i>                     | Marine      | 4  |    | 89     |
| <i>Pocillopora damicornis</i>           | Marine      | 1  |    | 90,91  |
| <i>Podocnemis expansa</i>               | Aquatic     | 1  | 1  | 92     |
| <i>Presbytis thomasi</i>                | Terrestrial | 1  |    | 93     |
| <i>Propithecus edwardsi</i>             | Terrestrial | 2  | 2  | 94     |
| <i>Propithecus verreauxi</i>            | Terrestrial | 24 | 24 | 21,95  |
| <i>Rangifer tarandus platyrhynchus</i>  | Terrestrial | 1  |    | 96     |
| <i>Rutilus rutilus</i>                  | Aquatic     | 1  | 1  | 97     |
| <i>Saguinus fuscicollis</i>             | Terrestrial | 4  |    | 98     |
| <i>Saguinus imperator</i>               | Terrestrial | 3  |    | 98     |
| <i>Sceloporus grammicus</i>             | Terrestrial | 8  | 8  | 99–101 |
| <i>Sceloporus mucronatus mucronatus</i> | Terrestrial | 1  | 1  | 102    |
| <i>Scolytus ventralis</i>               | Terrestrial | 5  | 5  | 103    |
| <i>Spermophilus dauricus</i>            | Terrestrial | 1  | 1  | 104    |
| <i>Sterna hirundo</i>                   | Terrestrial | 8  |    | 105    |
| <i>Sternotherus odoratus</i>            | Aquatic     | 2  |    | 40     |
| <i>Sternula antillarum browni</i>       | Terrestrial | 1  |    |        |
| <i>Strix occidentalis occidentalis</i>  | Terrestrial | 12 | 11 | 106    |
| <i>Sus scrofa scrofa</i>                | Terrestrial | 1  |    | 107    |

|                                  |             |    |    |         |
|----------------------------------|-------------|----|----|---------|
| <i>Tamias striatus</i>           | Terrestrial | 11 |    | 108     |
| <i>Tamiasciurus hudsonicus</i>   | Terrestrial | 1  | 1  | 109     |
| <i>Thalassarche melanophris</i>  | Terrestrial | 1  |    | 110,111 |
| <i>Umbonium costatum</i>         | Marine      | 8  | 8  | 112     |
| <i>Urocitellus armatus</i>       | Terrestrial | 1  | 1  | 113     |
| <i>Urocitellus beldingi</i>      | Terrestrial | 1  |    | 114     |
| <i>Urocyon littoralis</i>        | Terrestrial | 2  | 2  | 115     |
| <i>Ursus americanus</i>          | Terrestrial | 4  | 4  | 116–118 |
| <i>Ursus arctos horribilis</i>   | Terrestrial | 1  |    | 119     |
| <i>Ursus maritimus</i>           | Terrestrial | 5  | 5  | 120     |
| <i>Vipera aspis</i>              | Terrestrial | 1  | 1  | 121     |
| <i>Xenosaurus grandis</i>        | Terrestrial | 4  | 4  | 122     |
| <i>Xenosaurus platyceps</i>      | Terrestrial | 6  | 6  | 123     |
| <i>Xestospongia muta</i>         | Marine      | 5  | 2  | 124     |
| <i>Zalophus californianus</i>    | Marine      | 9  | 7  | 125     |
| <i>Zoarces viviparus</i>         | Marine      | 4  | 1  | 126     |
| <i>Zootoca vivipara</i>          | Terrestrial | 1  |    | 127     |
| <i>Abies balsamea</i>            | Terrestrial | 2  |    | 128     |
| <i>Abies concolor</i>            | Terrestrial | 12 | 11 | 129     |
| <i>Abies homolepis</i>           | Terrestrial | 1  |    | 130     |
| <i>Abies magnifica</i>           | Terrestrial | 11 | 9  | 129     |
| <i>Abies sachalinensis</i>       | Terrestrial | 3  | 2  | 131,132 |
| <i>Acacia aneura</i>             | Terrestrial | 1  |    |         |
| <i>Acacia victoriae</i>          | Terrestrial | 1  |    | 133     |
| <i>Acer palmatum</i>             | Terrestrial | 2  | 2  | 134     |
| <i>Acer pictum</i>               | Terrestrial | 2  | 2  | 134     |
| <i>Acer rufinerve</i>            | Terrestrial | 2  | 2  | 134     |
| <i>Acer saccharum</i>            | Terrestrial | 6  | 6  | 135     |
| <i>Achnatherum calamagrostis</i> | Terrestrial | 3  | 3  | 136     |
| <i>Actaea cordifolia</i>         | Terrestrial | 5  | 3  | 137     |
| <i>Actaea elata</i>              | Terrestrial | 4  | 2  | 138,139 |
| <i>Actaea spicata</i>            | Terrestrial | 12 | 12 | 140     |
| <i>Adenocarpus gibbsianus</i>    | Terrestrial | 13 | 2  | 141     |
| <i>Aesculus turbinata</i>        | Terrestrial | 3  |    | 142     |
| <i>Agave marmorata</i>           | Terrestrial | 2  |    | 143     |
| <i>Agave potatorum</i>           | Terrestrial | 2  |    | 144     |
| <i>Agave vivipara</i>            | Terrestrial | 2  |    | 145     |
| <i>Agrimonia eupatoria</i>       | Terrestrial | 10 | 6  | 146     |
| <i>Agropyron cristatum</i>       | Terrestrial | 2  |    | 147     |
| <i>Ailanthus altissima</i>       | Terrestrial | 1  | 1  | 148,149 |
| <i>Alliaria petiolata</i>        | Terrestrial | 38 |    | 149–151 |
| <i>Allium monanthum</i>          | Terrestrial | 2  | 1  | 152     |
| <i>Allium vineale</i>            | Terrestrial | 2  |    | 149     |
| <i>Alnus rubra</i>               | Terrestrial | 6  | 5  |         |
| <i>Ambrosia deltoidea</i>        | Terrestrial | 1  | 1  |         |
| <i>Anarrhinum fruticosum</i>     | Terrestrial | 5  | 3  | 141     |

|                                           |             |     |     |         |
|-------------------------------------------|-------------|-----|-----|---------|
| <i>Andira aubletii</i>                    | Terrestrial | 1   | 1   |         |
| <i>Andropogon gerardii</i>                | Terrestrial | 20  | 9   | 153     |
| <i>Androsace vitaliana</i>                | Terrestrial | 2   | 2   |         |
| <i>Anemone patens</i>                     | Terrestrial | 1   | 1   | 154     |
| <i>Anthericum liliago</i>                 | Terrestrial | 6   |     | 155     |
| <i>Anthericum ramosum</i>                 | Terrestrial | 11  |     | 155     |
| <i>Anthyllis vulneraria</i>               | Terrestrial | 40  | 23  | 156,157 |
| <i>Antirrhinum lopesianum</i>             | Terrestrial | 3   | 2   | 141     |
| <i>Antirrhinum subbaeticum</i>            | Terrestrial | 2   | 2   | 141     |
| <i>Aquilaria crassna</i>                  | Terrestrial | 1   | 1   | 158     |
| <i>Aquilegia chrysantha</i>               | Terrestrial | 1   | 1   | 159     |
| <i>Aquilegia sp.</i>                      | Terrestrial | 1   |     | 160     |
| <i>Araucaria cunninghamii</i>             | Terrestrial | 4   | 4   | 161     |
| <i>Araucaria muelleri</i>                 | Terrestrial | 4   | 4   | 162     |
| <i>Arctophila fulva</i>                   | Terrestrial | 3   |     | 163     |
| <i>Arenaria grandiflora</i>               | Terrestrial | 5   | 3   | 141     |
| <i>Arisaema serratum</i>                  | Terrestrial | 1   | 1   | 164     |
| <i>Arisaema triphyllum</i>                | Terrestrial | 4   |     | 165     |
| <i>Armeria maritima</i>                   | Terrestrial | 1   | 1   | 166     |
| <i>Armeria merinoi</i>                    | Terrestrial | 10  | 4   | 141     |
| <i>Arnica angustifolia</i>                | Terrestrial | 1   |     | 167     |
| <i>Artemisia genipi</i>                   | Terrestrial | 4   | 4   | 157     |
| <i>Asclepias meadii</i>                   | Terrestrial | 2   | 2   | 168     |
| <i>Aspasia principissa</i>                | Terrestrial | 1   | 1   | 169     |
| <i>Asplenium adulterinum</i>              | Terrestrial | 18  |     | 170     |
| <i>Asplenium cuneifolium</i>              | Terrestrial | 12  | 12  | 170     |
| <i>Asplenium scolopendrium</i>            | Terrestrial | 6   | 6   | 171     |
| <i>Aster amellus</i>                      | Terrestrial | 27  |     | 172     |
| <i>Aster pyrenaeus</i>                    | Terrestrial | 5   |     | 141     |
| <i>Astragalus alopecurus</i>              | Terrestrial | 15  | 6   |         |
| <i>Astragalus bibullatus</i>              | Terrestrial | 4   | 4   | 173     |
| <i>Astragalus cremnophylax</i>            | Terrestrial | 2   |     | 174     |
| <i>Astragalus michauxii</i>               | Terrestrial | 1   | 1   | 175     |
| <i>Astragalus scaphoides</i>              | Terrestrial | 115 | 101 | 176,177 |
| <i>Astragalus tremolsianus</i>            | Terrestrial | 5   | 3   | 141     |
| <i>Astragalus tyghensis</i>               | Terrestrial | 45  | 36  | 138     |
| <i>Astrocaryum mexicanum</i>              | Terrestrial | 7   | 5   | 178     |
| <i>Astrophytum asterias</i>               | Terrestrial | 8   | 7   | 179     |
| <i>Astrophytum capricorne</i>             | Terrestrial | 3   | 3   | 180     |
| <i>Astrophytum ornatum</i>                | Terrestrial | 3   | 3   | 181     |
| <i>Atriplex acanthocarpa</i>              | Terrestrial | 3   | 2   | 182     |
| <i>Atriplex canescens</i>                 | Terrestrial | 3   | 3   | 182     |
| <i>Aurinia saxatilis subsp. Saxatilis</i> | Terrestrial | 6   |     |         |
| <i>Avicennia germinans</i>                | Terrestrial | 1   | 1   | 183     |
| <i>Balsamorhiza sagittata</i>             | Terrestrial | 5   |     | 184     |
| <i>Banksia ericifolia</i>                 | Terrestrial | 1   | 1   | 185     |

|                                  |             |     |    |         |
|----------------------------------|-------------|-----|----|---------|
| <i>Bertholletia excelsa</i>      | Terrestrial | 2   | 2  | 186     |
| <i>Betula pubescens pumila</i>   | Terrestrial | 3   |    | 187     |
| <i>Boechera fecunda</i>          | Terrestrial | 14  | 13 | 188     |
| <i>Borassus aethiopum</i>        | Terrestrial | 4   | 4  | 189     |
| <i>Bothriochloa insculpta</i>    | Terrestrial | 4   |    | 190     |
| <i>Bouteloua rigidiseta</i>      | Terrestrial | 3   |    | 191     |
| <i>Brassica insularis</i>        | Terrestrial | 36  | 31 | 192     |
| <i>Brosimum alicastrum</i>       | Terrestrial | 1   |    | 193     |
| <i>Bursera glabrifolia</i>       | Terrestrial | 3   | 1  | 194     |
| <i>Calamagrostis canescens</i>   | Terrestrial | 1   |    | 195     |
| <i>Calamus nambariensis</i>      | Terrestrial | 1   |    | 196     |
| <i>Calamus rhabdocladus</i>      | Terrestrial | 1   |    | 196     |
| <i>Calocedrus decurrens</i>      | Terrestrial | 6   | 6  | 129     |
| <i>Calochortus albus</i>         | Terrestrial | 2   | 2  | 197     |
| <i>Calochortus lyallii</i>       | Terrestrial | 44  | 44 | 198     |
| <i>Calochortus obispoensis</i>   | Terrestrial | 2   | 1  | 197     |
| <i>Calochortus pulchellus</i>    | Terrestrial | 2   | 1  | 197     |
| <i>Calochortus tiburonensis</i>  | Terrestrial | 2   | 2  | 197     |
| <i>Camellia japonica</i>         | Terrestrial | 2   | 1  | 199     |
| <i>Carduus nutans</i>            | Terrestrial | 5   | 4  | 151,200 |
| <i>Carex bigelowii</i>           | Terrestrial | 1   |    | 201     |
| <i>Carex humilis</i>             | Terrestrial | 8   |    | 202     |
| <i>Carlina vulgaris</i>          | Terrestrial | 8   | 3  |         |
| <i>Carnegiea gigantea</i>        | Terrestrial | 1   | 1  | 203     |
| <i>Castanea dentata</i>          | Terrestrial | 24  | 23 | 204     |
| <i>Catopsis compacta</i>         | Terrestrial | 3   | 3  | 205     |
| <i>Catopsis sessiliflora</i>     | Terrestrial | 2   | 1  | 206     |
| <i>Cecropia obtusifolia</i>      | Terrestrial | 3   | 3  | 207     |
| <i>Cedrela odorata</i>           | Terrestrial | 15  |    | 208     |
| <i>Centaurea horrida</i>         | Terrestrial | 3   | 3  | 209     |
| <i>Centaurea jacea</i>           | Terrestrial | 4   |    | 210     |
| <i>Cephalocereus senilis</i>     | Terrestrial | 1   |    |         |
| <i>Chamaecrista lineata</i>      | terrestrial | 12  | 11 | 211     |
| <i>Chamaedorea radicalis</i>     | Terrestrial | 8   | 7  | 212     |
| <i>Cheirolophus metlesicsii</i>  | Terrestrial | 5   | 2  | 141     |
| <i>Cherleria obtusiloba</i>      | Terrestrial | 1   | 1  | 213     |
| <i>Chlorocardium rodiei</i>      | Terrestrial | 1   | 1  | 214     |
| <i>Cirsium acaule</i>            | Terrestrial | 2   | 2  | 148,215 |
| <i>Cirsium dissectum</i>         | Terrestrial | 13  |    | 216     |
| <i>Cirsium palustre</i>          | Terrestrial | 3   |    | 217     |
| <i>Cirsium pannonicum</i>        | Terrestrial | 1   | 1  | 215     |
| <i>Cirsium perplexans</i>        | Terrestrial | 2   | 2  | 218     |
| <i>Cirsium pitcheri</i>          | Terrestrial | 142 | 87 | 219,220 |
| <i>Cirsium vulgare</i>           | Terrestrial | 3   |    | 221–223 |
| <i>Cleistesiopsis bifaria</i>    | Terrestrial | 7   |    | 224     |
| <i>Cleistesiopsis divaricata</i> | Terrestrial | 5   |    | 224     |

|                                    |             |    |    |         |
|------------------------------------|-------------|----|----|---------|
| <i>Clidemia hirta</i>              | Terrestrial | 6  | 4  | 225     |
| <i>Coccothrinax readii</i>         | Terrestrial | 1  | 1  | 226     |
| <i>Coespeletia spicata</i>         | Terrestrial | 1  | 1  | 227     |
| <i>Coespeletia timotensis</i>      | Terrestrial | 1  | 1  | 227     |
| <i>Conradina glabra</i>            | Terrestrial | 4  | 3  | 228     |
| <i>Coprinopsis cinerea</i>         | Terrestrial | 2  | 2  | 141     |
| <i>Corallorhiza trifida</i>        | Terrestrial | 5  | 4  | 141     |
| <i>Cornus florida</i>              | Terrestrial | 1  | 1  |         |
| <i>Cucurbita pepo</i>              | Terrestrial | 3  | 3  | 229     |
| <i>Cynoglossum officinale</i>      | Terrestrial | 1  |    | 230     |
| <i>Cypripedium calceolus</i>       | Terrestrial | 30 |    | 231     |
| <i>Cypripedium fasciculatum</i>    | Terrestrial | 24 | 23 |         |
| <i>Cypripedium lentiginosum</i>    | Terrestrial | 1  |    | 232     |
| <i>Cyrtandra dentata</i>           | Terrestrial | 20 | 20 | 233     |
| <i>Cytisus scoparius</i>           | Terrestrial | 20 | 18 | 234     |
| <i>Dactylorhiza lapponica</i>      | Terrestrial | 4  | 2  | 235,236 |
| <i>Daemonorops poilanei</i>        | Terrestrial | 1  |    | 196     |
| <i>Danthonia sericea</i>           | Terrestrial | 10 | 8  | 237     |
| <i>Daphne rodriguezii</i>          | Terrestrial | 41 |    | 238     |
| <i>Dendropanax trifidus</i>        | Terrestrial | 1  |    | 199     |
| <i>Dicentra canadensis</i>         | Terrestrial | 9  |    | 239     |
| <i>Dicerandra frutescens</i>       | Terrestrial | 59 | 40 | 240     |
| <i>Dicorynia guianensis</i>        | Terrestrial | 1  | 1  | 241     |
| <i>Dicymbe altsonii</i>            | Terrestrial | 1  | 1  |         |
| <i>Digitaria eriantha</i>          | Terrestrial | 4  |    | 190     |
| <i>Dioon caputoi</i>               | Terrestrial | 3  | 3  | 242     |
| <i>Dioon edule</i>                 | Terrestrial | 3  |    | 243     |
| <i>Dioon merolae</i>               | Terrestrial | 8  | 3  | 244     |
| <i>Dioon sonorensis</i>            | Terrestrial | 1  | 1  | 245     |
| <i>Dioon spinulosum</i>            | Terrestrial | 2  | 2  |         |
| <i>Dioscorea chouardii</i>         | Terrestrial | 1  | 1  | 246     |
| <i>Dipsacus fullonum</i>           | Terrestrial | 2  |    | 247     |
| <i>Disporum sessile</i>            | Terrestrial | 2  | 1  | 152     |
| <i>Disporum smilacinum</i>         | Terrestrial | 2  | 1  | 152     |
| <i>Dracocephalum austriacum</i>    | Terrestrial | 36 | 28 | 248     |
| <i>Duguetia neglecta</i>           | Terrestrial | 1  | 1  |         |
| <i>Echeveria longissima</i>        | Terrestrial | 1  |    | 249     |
| <i>Echinacea angustifolia</i>      | Terrestrial | 8  | 8  | 250,251 |
| <i>Echinocactus platyacanthus</i>  | Terrestrial | 12 | 12 | 252     |
| <i>Echinospartum ibericum</i>      | Terrestrial | 5  | 1  | 141     |
| <i>Encephalartos cycadifolius</i>  | Terrestrial | 1  | 1  | 253     |
| <i>Encephalartos villosus</i>      | Terrestrial | 1  | 1  | 253     |
| <i>Entandrophragma cylindricum</i> | Terrestrial | 1  | 1  | 254     |
| <i>Eperua falcata</i>              | Terrestrial | 1  | 1  | 255     |
| <i>Epilobium latifolium</i>        | Terrestrial | 2  |    | 256     |
| <i>Epipactis atrorubens</i>        | Terrestrial | 11 | 3  | 257     |



|                                  |             |    |    |         |
|----------------------------------|-------------|----|----|---------|
| <i>Eremophila forrestii</i>      | Terrestrial | 9  | 9  | 258     |
| <i>Eremophila maitlandii</i>     | Terrestrial | 12 | 10 | 258     |
| <i>Eriogonum longifolium</i>     | Terrestrial | 16 | 16 | 259     |
| <i>Eritrichium caucasicum</i>    | Terrestrial | 4  | 2  | 260     |
| <i>Erodium paularense</i>        | Terrestrial | 10 | 10 | 141     |
| <i>Erophila verna</i>            | Terrestrial | 1  |    | 151     |
| <i>Erycina crista-galli</i>      | Terrestrial | 2  | 2  |         |
| <i>Eryngium alpinum</i>          | Terrestrial | 9  | 8  | 261     |
| <i>Eryngium cuneifolium</i>      | Terrestrial | 48 | 38 | 262     |
| <i>Eryngium maritimum</i>        | Terrestrial | 2  | 2  | 263     |
| <i>Erythranthe cardinalis</i>    | Terrestrial | 12 | 10 | 264     |
| <i>Erythranthe lewisii</i>       | Terrestrial | 12 | 8  | 264     |
| <i>Erythronium japonicum</i>     | Terrestrial | 2  | 2  | 152,265 |
| <i>Escobaria robbinsorum</i>     | Terrestrial | 12 | 9  | 266     |
| <i>Escontria chiotilla</i>       | Terrestrial | 2  | 2  |         |
| <i>Eupatorium perfoliatum</i>    | Terrestrial | 3  |    | 267     |
| <i>Eupatorium resinosum</i>      | Terrestrial | 3  |    | 267     |
| <i>Euphorbia fontqueriana</i>    | Terrestrial | 5  | 4  | 141     |
| <i>Euterpe edulis</i>            | Terrestrial | 3  | 3  | 268     |
| <i>Euterpe precatoria</i>        | Terrestrial | 4  | 4  | 269     |
| <i>Fagus crenata</i>             | Terrestrial | 1  |    | 130     |
| <i>Fagus grandifolia</i>         | Terrestrial | 3  | 3  | 270     |
| <i>Festuca eskia</i>             | Terrestrial | 2  |    | 271     |
| <i>Frasera speciosa</i>          | Terrestrial | 34 |    | 272     |
| <i>Fritillaria biflora</i>       | Terrestrial | 2  |    | 273     |
| <i>Fuscospora fusca</i>          | terrestrial | 6  | 6  | 274     |
| <i>Gardenia actinocarpa</i>      | Terrestrial | 4  | 2  | 275     |
| <i>Gentiana pneumonanthe</i>     | Terrestrial | 4  | 2  | 276     |
| <i>Gentianella campestris</i>    | Terrestrial | 1  |    | 277     |
| <i>Geonoma deversa</i>           | Terrestrial | 4  |    | 278     |
| <i>Geonoma macrostachys</i>      | Terrestrial | 1  | 1  | 279     |
| <i>Geonoma pohliana</i>          | Terrestrial | 2  | 2  | 280     |
| <i>Geonoma schottiana</i>        | Terrestrial | 4  | 2  | 281     |
| <i>Geranium sylvaticum</i>       | Terrestrial | 3  | 3  | 282     |
| <i>Geum reptans</i>              | Terrestrial | 4  |    | 283     |
| <i>Geum rivale</i>               | Terrestrial | 6  | 3  | 146     |
| <i>Goeppertia ovandensis</i>     | Terrestrial | 16 | 3  | 284     |
| <i>Grias peruviana</i>           | Terrestrial | 1  | 1  | 193     |
| <i>Guaiacum sanctum</i>          | Terrestrial | 4  | 2  |         |
| <i>Guarianthe aurantiaca</i>     | Terrestrial | 3  | 3  | 285     |
| <i>Guettarda viburnoides</i>     | Terrestrial | 3  | 3  | 286     |
| <i>Helenium virginicum</i>       | Terrestrial | 1  | 1  | 287     |
| <i>Helianthemum juliae</i>       | Terrestrial | 9  | 7  | 288     |
| <i>Helianthemum polygonoides</i> | Terrestrial | 5  | 5  | 141     |
| <i>Helianthemum teneriffae</i>   | Terrestrial | 5  | 3  | 141     |
| <i>Helianthus divaricatus</i>    | Terrestrial | 8  |    | 289     |



|                                  |             |    |    |         |
|----------------------------------|-------------|----|----|---------|
| <i>Heliconia acuminata</i>       | Terrestrial | 9  | 9  | 290     |
| <i>Heteropogon contortus</i>     | Terrestrial | 4  | 3  | 190     |
| <i>Heteropsis flexuosa</i>       | Terrestrial | 2  |    | 291     |
| <i>Heteropsis macrophylla</i>    | Terrestrial | 2  |    | 291     |
| <i>Heteropsis oblongifolia</i>   | Terrestrial | 2  |    | 291     |
| <i>Hilaria mutica</i>            | Terrestrial | 4  | 4  | 292     |
| <i>Himantoglossum hircinum</i>   | Terrestrial | 1  | 1  | 293     |
| <i>Himatanthus drasticus</i>     | Terrestrial | 8  | 8  | 294     |
| <i>Horkelia congesta</i>         | Terrestrial | 6  |    |         |
| <i>Hudsonia montana</i>          | Terrestrial | 1  |    | 295     |
| <i>Hydrastis canadensis</i>      | Terrestrial | 29 |    | 296,297 |
| <i>Hylocomium splendens</i>      | Terrestrial | 12 |    | 298,299 |
| <i>Hypericum cumulicola</i>      | Terrestrial | 66 | 35 | 300     |
| <i>Hypochaeris radicata</i>      | Terrestrial | 2  |    | 301     |
| <i>Iriartea deltoidea</i>        | Terrestrial | 5  | 5  | 302     |
| <i>Isatis tinctoria</i>          | Terrestrial | 1  |    | 303     |
| <i>Jacobaea vulgaris</i>         | Terrestrial | 3  |    | 304     |
| <i>Jacquiiniella leucomelana</i> | Terrestrial | 3  |    | 305     |
| <i>Jacquiiniella teretifolia</i> | Terrestrial | 3  |    | 305     |
| <i>Juniperus procera</i>         | Terrestrial | 1  | 1  | 306     |
| <i>Jurinea fontqueri</i>         | Terrestrial | 5  | 3  | 141     |
| <i>Khaya senegalensis</i>        | Terrestrial | 12 | 11 | 307     |
| <i>Knautia arvensis</i>          | Terrestrial | 1  |    | 308     |
| <i>Kosteletzkya pentacarpos</i>  | Terrestrial | 8  | 7  | 309     |
| <i>Lantana camara</i>            | Terrestrial | 10 |    | 310     |
| <i>Laserpitium longiradium</i>   | Terrestrial | 5  | 3  | 141     |
| <i>Lathyrus vernus</i>           | Terrestrial | 32 | 17 | 311     |
| <i>Lechea cernua</i>             | Terrestrial | 8  | 8  | 312     |
| <i>Lechea deckertii</i>          | Terrestrial | 8  | 7  | 312     |
| <i>Leontodon saxatilis</i>       | Terrestrial | 4  | 4  |         |
| <i>Lepidium davisii</i>          | Terrestrial | 22 | 4  |         |
| <i>Leptocoryphium lanatum</i>    | Terrestrial | 1  |    | 313     |
| <i>Lespedeza juncea sericea</i>  | Terrestrial | 3  |    | 151,314 |
| <i>Lespedeza virginica</i>       | Terrestrial | 1  |    | 315     |
| <i>Liatrix scariosa</i>          | Terrestrial | 15 | 7  | 316     |
| <i>Ligularia sibirica</i>        | Terrestrial | 33 | 6  | 317     |
| <i>Limonium carolinianum</i>     | Terrestrial | 1  | 1  | 318     |
| <i>Limonium erectum</i>          | Terrestrial | 5  | 5  | 141     |
| <i>Limonium malacitanum</i>      | Terrestrial | 5  | 2  | 141     |
| <i>Linum catharticum</i>         | Terrestrial | 1  |    | 319     |
| <i>Lomatium bradshawii</i>       | Terrestrial | 9  | 9  | 138     |
| <i>Lomatium cookii</i>           | Terrestrial | 10 | 9  | 138     |
| <i>Lonicera maackii</i>          | Terrestrial | 2  | 2  | 149     |
| <i>Lophophora diffusa</i>        | Terrestrial | 2  | 2  |         |
| <i>Lotus arinagensis</i>         | Terrestrial | 6  |    | 141     |
| <i>Lupinus tidestromii</i>       | Terrestrial | 9  | 9  | 320     |

|                                      |             |    |    |             |
|--------------------------------------|-------------|----|----|-------------|
| <i>Lycaste aromatica</i>             | Terrestrial | 3  |    | 305         |
| <i>Machaerium cuspidatum</i>         | Terrestrial | 3  |    | 321         |
| <i>Magnolia macrophylla</i>          | Terrestrial | 3  | 3  | 322         |
| <i>Mammillaria crucigera</i>         | Terrestrial | 2  | 2  | 323         |
| <i>Mammillaria dixanthocentron</i>   | Terrestrial | 1  | 1  |             |
| <i>Mammillaria gaumeri</i>           | Terrestrial | 24 |    |             |
| <i>Mammillaria hernandezii</i>       | Terrestrial | 6  | 5  |             |
| <i>Mammillaria huitzilopochtli</i>   | Terrestrial | 5  | 5  | 324         |
| <i>Mammillaria magnimamma</i>        | Terrestrial | 4  | 4  | 325         |
| <i>Mammillaria napina</i>            | Terrestrial | 3  | 2  |             |
| <i>Mammillaria pectinifera</i>       | Terrestrial | 1  | 1  | 326         |
| <i>Mammillaria solisioides</i>       | Terrestrial | 3  | 3  |             |
| <i>Mammillaria supertexta</i>        | Terrestrial | 1  | 1  |             |
| <i>Manilkara zapota</i>              | Terrestrial | 2  | 2  | 327         |
| <i>Mauritia flexuosa</i>             | Terrestrial | 1  | 1  | 328         |
| <i>Melaleuca viridiflora</i>         | Terrestrial | 3  |    | 329         |
| <i>Melocactus bahiensis</i>          | Terrestrial | 2  | 2  | 330         |
| <i>Melocactus ernestii</i>           | Terrestrial | 4  | 4  |             |
| <i>Miconia albicans</i>              | Terrestrial | 1  | 1  | 331         |
| <i>Miconia prasina</i>               | Terrestrial | 8  |    | 332         |
| <i>Microberlinia bisulcata</i>       | Terrestrial | 1  | 1  | 333         |
| <i>Mimulus guttatus</i>              | Terrestrial | 22 |    | 334,335     |
| <i>Molinia caerulea</i>              | Terrestrial | 12 | 6  | 336         |
| <i>Myrsine guianensis</i>            | Terrestrial | 1  |    | 331         |
| <i>Nardostachys jatamansi</i>        | Terrestrial | 1  | 1  | 337         |
| <i>Neobuxbaumia macrocephala</i>     | Terrestrial | 7  | 7  | 338,339     |
| <i>Neobuxbaumia mezcalaensis</i>     | Terrestrial | 6  | 6  | 338         |
| <i>Neobuxbaumia polylopha</i>        | Terrestrial | 2  | 2  | 340         |
| <i>Neobuxbaumia tetetzo</i>          | Terrestrial | 6  | 6  | 338,339,341 |
| <i>Neotinea ustulata</i>             | Terrestrial | 5  | 5  | 342         |
| <i>Oenothera deltoides</i>           | Terrestrial | 16 | 16 | 343         |
| <i>Olearia flocktoniae</i>           | Terrestrial | 8  |    | 344         |
| <i>Oncidium poikilostalix</i>        | Terrestrial | 2  | 2  | 345,346     |
| <i>Opuntia macrocentra</i>           | Terrestrial | 2  |    | 347         |
| <i>Opuntia macrorhiza</i>            | Terrestrial | 27 | 6  | 348         |
| <i>Opuntia microdasys</i>            | Terrestrial | 4  |    |             |
| <i>Opuntia rastrera</i>              | Terrestrial | 14 | 9  | 349         |
| <i>Orchis purpurea</i>               | Terrestrial | 36 | 28 | 350         |
| <i>Oreocarya flava</i>               | Terrestrial | 3  | 3  | 351         |
| <i>Oxalis acetosella</i>             | Terrestrial | 6  |    | 352         |
| <i>Oxandra asbeckii</i>              | Terrestrial | 1  | 1  | 255         |
| <i>Oxytropis jabalambrensis</i>      | Terrestrial | 4  | 2  | 141         |
| <i>Pachycereus pecten-aboriginum</i> | Terrestrial | 3  | 3  | 353         |
| <i>Paeonia officinalis</i>           | Terrestrial | 15 |    | 354         |
| <i>Paliurus ramosissimus</i>         | Terrestrial | 2  |    | 355         |
| <i>Panax quinquefolius</i>           | Terrestrial | 2  | 1  |             |

|                                    |             |    |    |         |
|------------------------------------|-------------|----|----|---------|
| <i>Parkinsonia aculeata</i>        | Terrestrial | 1  | 1  | 356     |
| <i>Parolinia glabriuscula</i>      | Terrestrial | 5  | 4  | 141     |
| <i>Paronychia pulvinata</i>        | Terrestrial | 1  | 1  | 213     |
| <i>Pediomelum esculentum</i>       | Terrestrial | 8  | 6  |         |
| <i>Pentaclethra macroleoba</i>     | Terrestrial | 1  | 1  |         |
| <i>Periandra mediterranea</i>      | Terrestrial | 1  | 1  | 357     |
| <i>Persoonia bargoensis</i>        | Terrestrial | 4  | 3  |         |
| <i>Persoonia glaucescens</i>       | Terrestrial | 3  | 3  |         |
| <i>Petrophile pulchella</i>        | Terrestrial | 1  | 1  | 185     |
| <i>Phyllanthus emblica</i>         | Terrestrial | 8  | 6  | 316,358 |
| <i>Phyllanthus indofischeri</i>    | Terrestrial | 3  | 3  | 358     |
| <i>Picea glehnii</i>               | Terrestrial | 1  |    | 132     |
| <i>Picea jezoensis</i>             | Terrestrial | 1  |    | 132     |
| <i>Pilosella floribunda</i>        | Terrestrial | 1  |    | 359     |
| <i>Pinguicula alpina</i>           | Terrestrial | 1  | 1  | 360     |
| <i>Pinguicula villosa</i>          | Terrestrial | 1  | 1  | 360     |
| <i>Pinguicula vulgaris</i>         | Terrestrial | 1  |    | 360     |
| <i>Pinus jeffreyi</i>              | Terrestrial | 1  |    | 129     |
| <i>Pinus lambertiana</i>           | Terrestrial | 6  | 6  | 129     |
| <i>Pinus maximartinezii</i>        | Terrestrial | 1  | 1  | 361     |
| <i>Pinus nigra</i>                 | Terrestrial | 3  | 1  | 362     |
| <i>Pinus ponderosa</i>             | Terrestrial | 1  | 1  | 129     |
| <i>Pinus strobus</i>               | Terrestrial | 9  | 9  | 363     |
| <i>Pityopsis aspera</i>            | Terrestrial | 2  | 1  | 364     |
| <i>Plantago coronopus</i>          | Terrestrial | 35 | 29 | 365     |
| <i>Plantago lanceolata</i>         | Terrestrial | 3  |    |         |
| <i>Platanthera hookeri</i>         | Terrestrial | 4  |    | 366     |
| <i>Poa alpina</i>                  | Terrestrial | 6  |    | 157     |
| <i>Polemonium van-bruntiae</i>     | Terrestrial | 9  |    | 367     |
| <i>Polygonum basiramium</i>        | Terrestrial | 8  | 2  | 312     |
| <i>Potentilla anserina</i>         | Terrestrial | 3  |    | 368     |
| <i>Potentilla recta</i>            | Terrestrial | 1  |    | 369     |
| <i>Primula elatior</i>             | Terrestrial | 21 | 13 | 370     |
| <i>Primula farinosa</i>            | Terrestrial | 16 | 7  | 371     |
| <i>Primula veris</i>               | Terrestrial | 4  | 1  | 372,373 |
| <i>Primula vulgaris</i>            | Terrestrial | 44 | 37 | 374     |
| <i>Prioria copaifera</i>           | Terrestrial | 2  | 2  | 375     |
| <i>Prosartes lanuginosa</i>        | Terrestrial | 4  | 4  | 376     |
| <i>Prosopis glandulosa</i>         | Terrestrial | 4  | 4  | 377     |
| <i>Prosopis laevigata</i>          | Terrestrial | 2  | 2  | 378     |
| <i>Prunus africana</i>             | Terrestrial | 2  | 2  | 379     |
| <i>Prunus serotina</i>             | Terrestrial | 3  | 2  | 380     |
| <i>Pseudomitrocereus fulviceps</i> | Terrestrial | 1  | 1  | 326     |
| <i>Pseudophoenix sargentii</i>     | Terrestrial | 7  | 7  | 381     |
| <i>Pterocarpus angolensis</i>      | Terrestrial | 1  | 1  |         |
| <i>Pterocereus gaumeri</i>         | Terrestrial | 4  | 4  | 382     |

|                                 |             |    |    |         |
|---------------------------------|-------------|----|----|---------|
| <i>Ptychosperma macarthurii</i> | Terrestrial | 1  | 1  | 383     |
| <i>Purshia subintegra</i>       | Terrestrial | 14 | 8  | 384     |
| <i>Pyrrocoma radiata</i>        | Terrestrial | 85 | 65 | 138     |
| <i>Quercus mongolica</i>        | Terrestrial | 1  | 1  | 131     |
| <i>Quercus rugosa</i>           | Terrestrial | 1  | 1  |         |
| <i>Ramonda myconi</i>           | Terrestrial | 15 | 13 | 385     |
| <i>Ranunculus acris</i>         | Terrestrial | 2  |    | 386     |
| <i>Ranunculus peltatus</i>      | Terrestrial | 5  | 3  |         |
| <i>Rhizophora mangle</i>        | Terrestrial | 1  | 1  | 183     |
| <i>Rhododendron maximum</i>     | Terrestrial | 3  | 1  | 387     |
| <i>Rhododendron ponticum</i>    | Terrestrial | 20 | 4  | 388     |
| <i>Rhopalostylis sapida</i>     | Terrestrial | 2  | 2  | 389     |
| <i>Rhus aromatica</i>           | Terrestrial | 8  |    | 289     |
| <i>Rhus copallinum</i>          | Terrestrial | 3  |    | 390     |
| <i>Rosa multiflora</i>          | Terrestrial | 1  |    | 149     |
| <i>Rosmarinus tomentosus</i>    | Terrestrial | 12 |    | 141     |
| <i>Roupala montana</i>          | Terrestrial | 1  |    | 331     |
| <i>Rourea induta</i>            | Terrestrial | 2  |    | 331     |
| <i>Rubus praecox</i>            | Terrestrial | 3  |    | 391     |
| <i>Rubus saxatilis</i>          | Terrestrial | 6  |    | 392     |
| <i>Rubus ursinus</i>            | Terrestrial | 3  |    | 391     |
| <i>Rumex rupestris</i>          | Terrestrial | 5  | 4  | 141     |
| <i>Ruppia maritima</i>          | Terrestrial | 3  |    | 393     |
| <i>Sabal minor</i>              | Terrestrial | 3  | 2  |         |
| <i>Salix arctica</i>            | Terrestrial | 7  |    | 394     |
| <i>Santolina melidensis</i>     | Terrestrial | 5  | 3  | 141     |
| <i>Saponaria bellidifolia</i>   | Terrestrial | 14 | 5  | 395     |
| <i>Sarcocapnos baetica</i>      | Terrestrial | 2  | 1  | 396     |
| <i>Sarcocapnos pulcherrima</i>  | Terrestrial | 4  | 2  | 396     |
| <i>Sarracenia purpurea</i>      | Terrestrial | 3  | 3  | 397,398 |
| <i>Saussurea medusa</i>         | Terrestrial | 4  |    | 399     |
| <i>Saxifraga aizoides</i>       | Terrestrial | 4  | 3  | 157     |
| <i>Saxifraga cotyledon</i>      | Terrestrial | 8  |    | 400     |
| <i>Scaphium macropodium</i>     | Terrestrial | 6  | 6  | 401     |
| <i>Scorzonera hispanica</i>     | Terrestrial | 1  | 1  | 402     |
| <i>Serapias cordigera</i>       | Terrestrial | 39 | 24 | 403     |
| <i>Shorea leprosula</i>         | Terrestrial | 3  | 3  | 404     |
| <i>Silene acaulis</i>           | Terrestrial | 25 | 13 | 405     |
| <i>Silene ciliata</i>           | Terrestrial | 7  | 5  | 406     |
| <i>Silene douglasii</i>         | Terrestrial | 3  | 3  | 407     |
| <i>Silene spaldingii</i>        | Terrestrial | 12 |    | 408     |
| <i>Solidago fistulosa</i>       | Terrestrial | 3  | 1  |         |
| <i>Sonchus pustulatus</i>       | Terrestrial | 1  | 1  | 409     |
| <i>Spartina alterniflora</i>    | Terrestrial | 1  |    | 410     |
| <i>Spathoglottis plicata</i>    | Terrestrial | 3  | 3  | 411     |
| <i>Stenocereus eruca</i>        | Terrestrial | 15 | 3  |         |

|                                      |             |             |             |         |
|--------------------------------------|-------------|-------------|-------------|---------|
| <i>Stryphnodendron microstachyum</i> | Terrestrial | 1           | 1           |         |
| <i>Succisa pratensis</i>             | Terrestrial | 12          | 9           | 412,413 |
| <i>Swallenia alexandrae</i>          | Terrestrial | 1           | 1           | 414     |
| <i>Swietenia macrophylla</i>         | Terrestrial | 1           | 1           | 415     |
| <i>Syngonanthus nitens</i>           | Terrestrial | 15          |             | 416     |
| <i>Syzygium jambos</i>               | Terrestrial | 1           | 1           | 417     |
| <i>Taraxacum campylodes</i>          | Terrestrial | 1           |             | 149     |
| <i>Taraxacum erythrospermum</i>      | Terrestrial | 2           |             | 149     |
| <i>Tetraberlinia bifoliolata</i>     | Terrestrial | 1           | 1           | 333     |
| <i>Tetraneuris herbacea</i>          | Terrestrial | 3           |             | 418     |
| <i>Thrinax radiata</i>               | Terrestrial | 3           | 3           | 226     |
| <i>Thymus vulgaris</i>               | Terrestrial | 4           | 1           | 141     |
| <i>Tillandsia brachycaulos</i>       | Terrestrial | 3           |             | 419     |
| <i>Tillandsia deppeana</i>           | Terrestrial | 2           | 2           | 305     |
| <i>Tillandsia juncea</i>             | Terrestrial | 2           | 1           | 305     |
| <i>Tillandsia macdougallii</i>       | Terrestrial | 5           | 5           | 420     |
| <i>Tillandsia multicaulis</i>        | Terrestrial | 2           | 2           | 305,421 |
| <i>Tillandsia punctulata</i>         | Terrestrial | 2           | 2           | 305,421 |
| <i>Tillandsia violacea</i>           | Terrestrial | 3           | 3           | 420     |
| <i>Tolumnia variegata</i>            | Terrestrial | 1           |             | 422     |
| <i>Tragopogon pratensis</i>          | Terrestrial | 1           |             | 423     |
| <i>Triadica sebifera</i>             | terrestrial | 12          | 12          |         |
| <i>Trillium camschatcense</i>        | Terrestrial | 1           | 1           | 424     |
| <i>Trillium grandiflorum</i>         | Terrestrial | 46          | 41          | 425     |
| <i>Trillium ovatum</i>               | Terrestrial | 23          | 2           |         |
| <i>Trillium persistens</i>           | Terrestrial | 12          | 12          |         |
| <i>Trollius laxus</i>                | Terrestrial | 11          | 10          | 426     |
| <i>Tsuga canadensis</i>              | Terrestrial | 4           | 4           | 427     |
| <i>Vella pseudocytisus</i>           | Terrestrial | 29          | 24          | 141     |
| <i>Verbascum fontqueri</i>           | Terrestrial | 6           | 4           | 141     |
| <i>Verbascum thapsus</i>             | Terrestrial | 1           |             | 151     |
| <i>Verticordia staminosa</i>         | Terrestrial | 4           |             | 428     |
| <i>Vincetoxicum rossicum</i>         | Terrestrial | 20          |             | 429     |
| <i>Viola elatior</i>                 | Terrestrial | 2           | 2           | 430     |
| <i>Viola pumila</i>                  | Terrestrial | 2           | 2           | 430     |
| <i>Viola sagittata</i>               | Terrestrial | 1           | 1           | 431     |
| <i>Vriesea sanguinolenta</i>         | Terrestrial | 4           | 4           | 432     |
| <i>Vulpicida pinastri</i>            | Terrestrial | 6           | 6           | 433     |
| <i>Zamia amblyphyllidia</i>          | Terrestrial | 2           |             | 434     |
| <i>Zamia inermis</i>                 | Terrestrial | 1           | 1           | 435     |
| <i>Zea diploperennis</i>             | Terrestrial | 4           | 3           | 436     |
| <b>Total</b>                         |             | <b>3890</b> | <b>2242</b> |         |

19 **S2. Data cleaning**

20 **Table S2. The relative effect of data cleaning on our demographic and environmental**  
 21 **variables.** Descriptive summary showing the number of outlying values omitted, the  
 22 transformation format used to achieve normality, and the total number of populations missing  
 23 estimates for each our demographic and environmental variables. Total number of  
 24 populations is 2242 across all variables.

| Variable                           | Omissions | Transformation        | Missing* |
|------------------------------------|-----------|-----------------------|----------|
| DAMPING RATIO ( $\rho$ )           | 29        | $1/y^{1.1}$           | 29       |
| Survival                           | 112       | NA                    | 112      |
| Progression                        | 112       | NA                    | 112      |
| Retgression                        | 114       | NA                    | 114      |
| Reproduction                       | 112       | NA                    | 112      |
| PERIOD OF OSCILLATION ( $\psi$ )   | 33        | $1/y^{0.4}$           | 799      |
| Survival                           | 71        | NA                    | 837      |
| Progression                        | 71        | NA                    | 837      |
| Retgression                        | 71        | NA                    | 837      |
| Reproduction                       | 68        | NA                    | 834      |
| REACTIVITY ( $\bar{\rho}$ )        | 55        | $1/y^{0.6}$           | 55       |
| Survival                           | 112       | $\log( y_{max}  - y)$ | 113      |
| Progression                        | 60        | $\log( y_{max}  - y)$ | 60       |
| Retgression                        | 69        | $\log(y +  y_{min} )$ | 69       |
| Reproduction                       | 81        | $\log( y_{max}  - y)$ | 81       |
| ATTENUATION ( $\underline{\rho}$ ) | 0         | $y^{0.7}$             | 0        |
| Survival                           | 44        | NA                    | 45       |
| Progression                        | 60        | $\log( y_{max}  - y)$ | 60       |
| Retgression                        | 41        | NA                    | 41       |
| Reproduction                       | 54        | $\log( y_{max}  - y)$ | 54       |

|                                                   |     |                       |     |
|---------------------------------------------------|-----|-----------------------|-----|
| MAXIMAL AMPLIFICATION ( $\bar{\rho}_{max}$ )      | 55  | $1/y^{0.5}$           | 55  |
| Survival                                          | 112 | NA                    | 113 |
| Progression                                       | 68  | $\log( y_{max}  - y)$ | 68  |
| Retgression                                       | 112 | NA                    | 112 |
| Reproduction                                      | 103 | $\log( y_{max}  - y)$ | 103 |
| MAXIMAL ATTENUATION ( $\underline{\rho}_{max}$ )  | 0   | $y^{0.4}$             | 0   |
| Survival                                          | 62  | NA                    | 63  |
| Progression                                       | 87  | $\log( y_{max}  - y)$ | 87  |
| Retgression                                       | 63  | $\log(y +  y_{min} )$ | 63  |
| Reproduction                                      | 89  | NA                    | 89  |
| FREQUENCY SPECTRUM<br>(Temperature, $\beta_T$ )   | 7   | NA                    | 70  |
| AUTOCORRELATION<br>(Temperature, $a_T$ )          | 37  | NA                    | 100 |
| THERMAL RANGE ( $m$ )                             | 1   | NA                    | 307 |
| FREQUENCY SPECTRUM<br>(Precipitation, $\beta_P$ ) | 0   | NA                    | 63  |
| AUTOCORRELATION<br>(Precipitation, $a_P$ )        | 0   | NA                    | 84  |

\*includes omitted values

25

26

27

28

29



### 30 S3. Constructing population-level phylogenetic trees

31 A phylogenetic tree was constructed to ensure all our analyses accounted for covariance  
32 between closely related species. The scientific names of all unique species within our subset  
33 of Matrix Population Models (MPMs) extracted from the COMPADRE<sup>1</sup> and COMADRE  
34 databases<sup>2</sup>, were cross-checked and taxonomically updated using the R package ‘*taxize*’<sup>437,438</sup>.  
35 We used the R package ‘*rotl*’<sup>439</sup>, to extract phylogenetic data for each species from the Open  
36 tree of Life (OTL)<sup>440</sup>. With this phylogenetic data, we constructed separate subtrees for  
37 brown/red algae, plants, and animal entities at the species level. We fused the three subtrees  
38 using the *bind.tree* tool from the ‘*phytools*’ package<sup>441</sup>. Whilst binding our subtrees, we  
39 combined the algae and plant subtrees first before then adding the animal subtree with marine  
40 sponges (*Demospongiae*) set as the outgroup.

41 We refined the structure of our species-level phylogenetic tree, specifically ensuring  
42 the tree was rooted and free of polytomies using the *is.rooted* and *multi2di* tools from the ‘*ape*’  
43 package<sup>442</sup>. Branch lengths were calculated using the Grafen method<sup>443</sup> assuming a Brownian  
44 motion mode of trait evolution, whereby the variance between species’ characteristics is  
45 directly proportional to time since divergence<sup>444</sup>. The phylogenetic tree was then time-  
46 calibrated using the *chronos* function and checked to confirm ultrametricity, with any  
47 duplicated node labels renamed. Lastly, to accommodate intra-specific spatial variation in vital  
48 rates, we expanded this phylogenetic tree to include population-level information for the 257  
49 species where data was available for more than one population (Fig. S1). For these repeated  
50 species, a number of artificial branches equal to the number of replicates, were bound to the  
51 corresponding species’ tip of the original phylogenetic tree. This process was carried out using  
52 the *bind.tip* function, with each of these artificial branches assigned an equal length of  
53 infinitesimally small value (*i.e.*, 0.0000001). The branch lengths for our taxonomic tree were  
54 then used in all further analyses to ensure our findings accounted for ancestral relationships<sup>445</sup>.

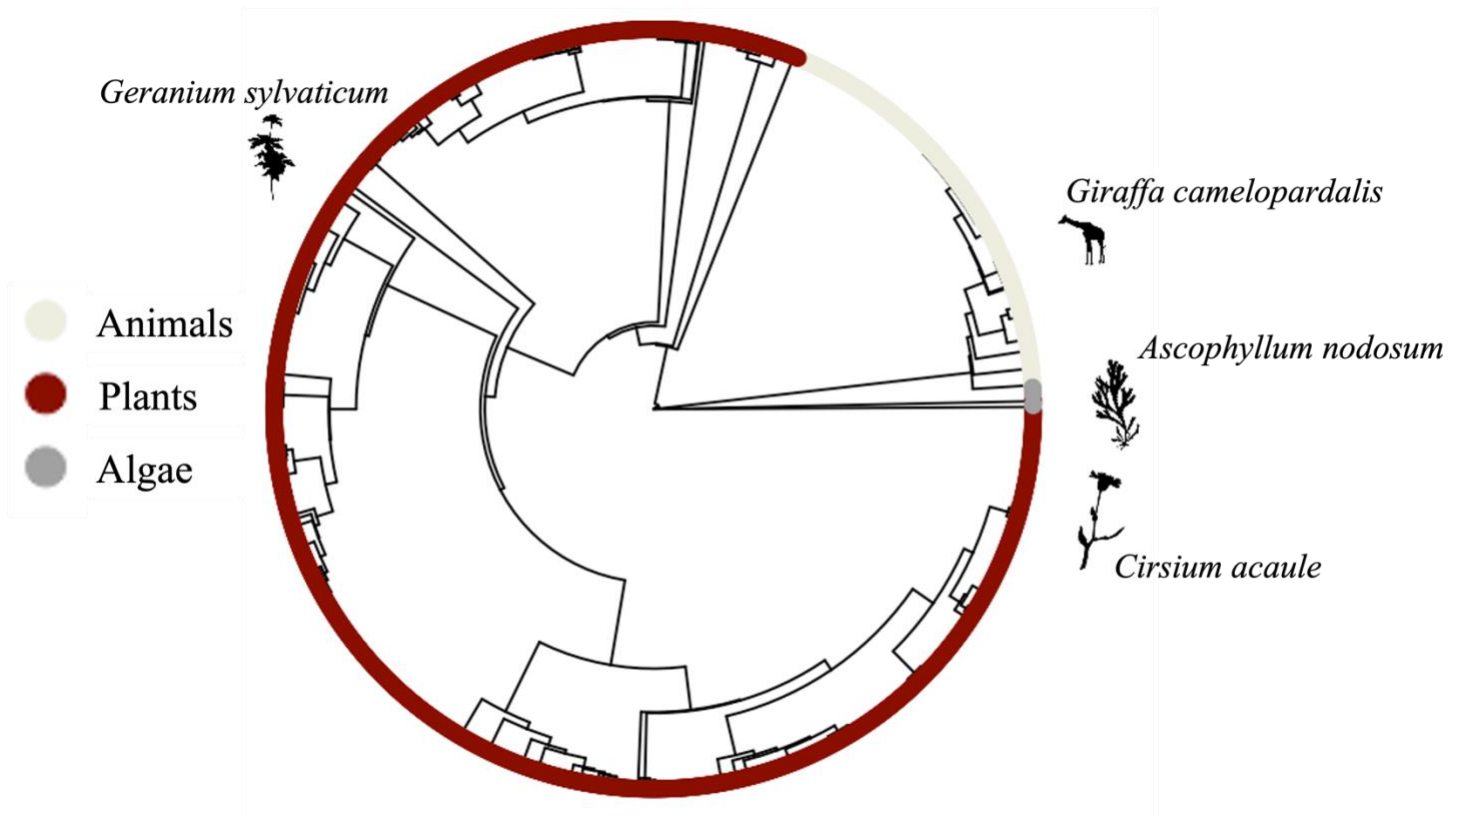

55

56 **Figure S1. Population-level phylogenetic tree displaying the relatedness of the 61 [37]**

57 **animals, 305 [219] plants, and 3 [1] red/brown algae species used in this comparative**

58 **assessment.** All our analyses have accounted for the phylogenetic signal between species.

59 However, we have also allowed for the existence of multiple population entries for a number

60 of species (shown above in square brackets), whilst assuming no within species trait

61 variation.

62

63

64

65

66

#### 67 **S4. Quantifying exposure to environmental stochasticity**

68 We quantified abiotic stochasticity to which each population has been exposed to examine the  
69 role of environmental stochasticity in shaping the resilience characteristics of *resistance*,  
70 *compensation*, and *recovery* across our 369 species. Using the GPS location information  
71 supplied with each extracted MPM from the COMPADRE<sup>1</sup> & COMADRE<sup>2</sup> databases, we  
72 linked each natural population to their corresponding abiotic environments.

73 To determine environmental stochasticity, we focused on maximum, and minimum  
74 monthly temperature (°C), and mean monthly precipitation records (kg m<sup>-2</sup>). These abiotic  
75 variables were selected as they are universally important across all ecoregions, except for in  
76 marine environments that are not directly affected by precipitation. Accordingly, we excluded  
77 MPMs associated with marine populations for this portion of our analysis (29 populations from  
78 6 animal species, and 10 populations from 3 algal species). For our remaining 2184 terrestrial  
79 and 19 freshwater populations, we sourced high resolution (1 km<sup>2</sup>) monthly temperature and  
80 precipitation records from the CHELSA climate database<sup>446</sup>. For each population, we extracted  
81 maximum, and minimum temperature readings, and mean precipitation records for a timeframe  
82 equal to the period during which the population was surveyed plus an additional 50 years prior  
83 to survey onset, to account for the effects of environmental legacy<sup>447</sup>. Within our sample there  
84 was a total of 2 freshwater and 277 terrestrial populations for which no environmental data  
85 could be sourced. Subsequently, these 279 populations (12.7%) were excluded from our  
86 analyses into the role of environmental variance in shaping resilience attributes.

87 We used five metrics to quantify the extent of environmental variance imposed on each  
88 population: thermal autocorrelation ( $a_T$ ), thermal range ( $m$ ), thermal frequency spectrum ( $\beta_T$ ),  
89 precipitation autocorrelation ( $a_P$ ), and precipitation frequency spectrum ( $\beta_P$ ). Extracted abiotic  
90 variables were arranged into time series depicting the 50+ year abiotic regimes to which each

91 population was exposed. We then estimated the temporal autocorrelation of each temperature  
92 ( $a_T$ ) and precipitation ( $a_P$ ) time series, using the ‘*colorednoise*’ package<sup>448</sup>. Next, we calculated  
93 the frequency spectrum of each time series. This metric is often referred to as the colour of  
94 environmental variation, and represented by a red to blue colour scale, with blue describing  
95 higher frequency variation and red variation dominated by low frequencies<sup>449</sup>. The frequency  
96 spectrum of a time series is expressed by its spectral exponent ( $\beta$ ), which is calculated as the  
97 negative slope coefficient of the linear regression between the log spectral density and log  
98 frequency of the time series<sup>450</sup>. The spectral exponent of the temperature ( $\beta_T$ ) and precipitation  
99 ( $\beta_P$ ) regimes to which each population was exposed were calculated using the *spectrum*  
100 command from the ‘*stats*’ package<sup>451</sup>. Finally, thermal range ( $m$ ) was estimated as the mean  
101 difference between maximum and minimum monthly temperatures throughout a time series,  
102 providing a measure of the magnitude of any abiotic variation. Finally, prior to further analyses,  
103 outliers outside of the 95% confidence intervals were discarded for each of the aforementioned  
104 metrics of environmental stochasticity (Table S2), and each variable was checked for  
105 normality.

106 A Principal Components analysis (PCA) was used to explore the interrelationships  
107 between our five abiotic variables (Fig. S2), whilst we also evaluated their collinearity using  
108 variance-inflation factors (VIF). VIF reflects the degree to which, in a regression model,  
109 estimates of coefficients for any given variable are inflated by collinearity, with values of  
110 between 1 and 10 representing low collinearity<sup>452,453</sup>. VIF values were estimated using the  
111 *multicol* function from the ‘*fuzzySim*’ package<sup>454</sup>. In our PCA the majority of the variation  
112 across our abiotic variables could be explained using the just the first two principal components  
113 (Proportional variance: PC1 0.43; PC2 0.28; PC3 0.16, PC4 0.08, PC5 0.05; Fig. S2). Here the  
114 first two principal components describe a gradient between the autocorrelation ( $a_T$  &  $a_P$ ) and  
115 frequency spectrum ( $\beta_T$  &  $\beta_P$ ) characteristics of abiotic environments (Table S3), reflecting a

116 transition from red coloured environments characterised by positive autocorrelation (future  
 117 abiotic conditions are conditional and similar to current conditions) and low frequency  
 118 oscillations (seasonality), towards blue coloured environments with higher frequency  
 119 oscillations, and negative temporal autocorrelation (i.e. future conditions contrast with current  
 120 conditions). This trend corresponds with conditions expected of natural environments, as  
 121 terrestrial environments are typically characterised by red coloured variation with marine  
 122 environments considered even less variable<sup>450,455</sup>; hence the lack of blue coloured environments  
 123 within our PCA (Fig. S2). However, with VIF confirming there was no collinearity among our  
 124 five abiotic variables (VIF:  $\beta_T = 1.85$ ;  $a_T = 2.12$ ;  $m = 1.17$ ;  $\beta_P = 1.83$ ;  $a_P = 1.93$ ), all variables

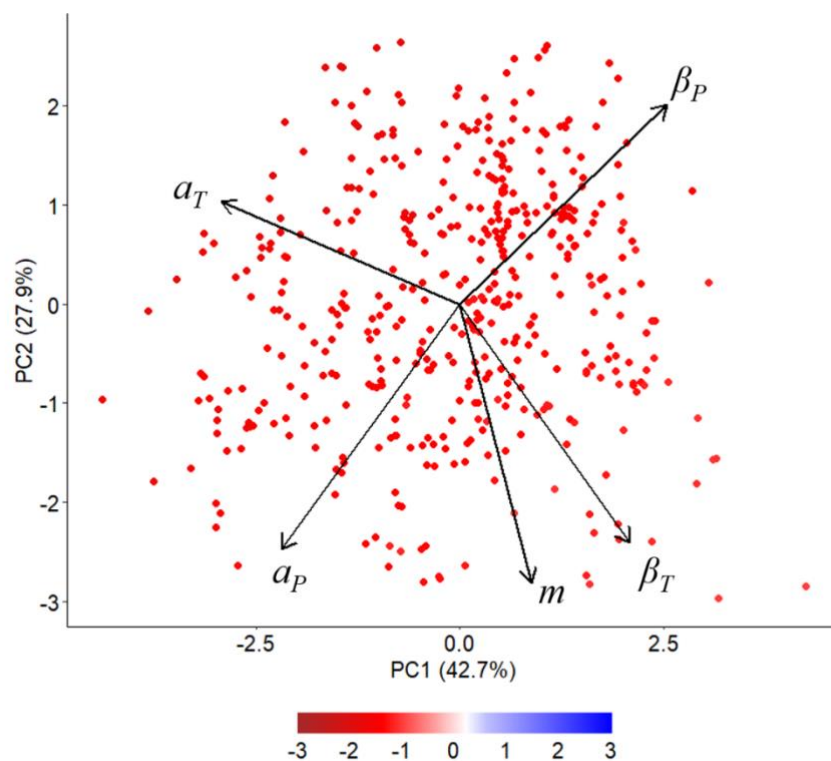

125 were retained in further analyses.

126 **Figure S2. Variation in the exposure of populations to environmental stochasticity**  
 127 **corresponded with gradients in the autocorrelation and frequency spectrum**  
 128 **characteristics of local abiotic regimes.** Principal component analysis (PCA) of the five

129 metrics used to quantify exposure to environmental stochasticity: thermal autocorrelation  
 130 ( $a_T$ ), thermal range ( $m$ ), thermal frequency spectrum ( $\beta_T$ ), precipitation autocorrelation ( $a_P$ ),  
 131 and precipitation frequency spectrum ( $\beta_P$ ) illustrating the degree of collinearity between the  
 132 different variables. Colour scale depicts the gradient of environmental noise corresponding  
 133 with transitions from red coloured environments characterised by positive autocorrelation and  
 134 low frequency oscillations, towards blue coloured environments with higher frequency  
 135 oscillations, and negative temporal autocorrelation. The colour of each environment was  
 136 defined based on its associated thermal frequency exponent ( $\beta_T$ ) to demonstrate how abiotic  
 137 variance regimes align with our five selected metrics.

138

139 **Table S3. Patterns within temperature and precipitation regimes characterised the**  
 140 **relative exposure of populations to environmental stochasticity.** Principal component  
 141 loadings of the five measures of environmental stochasticity, thermal autocorrelation ( $a_T$ ),  
 142 thermal range ( $m$ ), thermal frequency spectrum ( $\beta_T$ ), precipitation autocorrelation ( $a_P$ ), and  
 143 precipitation frequency spectrum ( $\beta_P$ ) showing the relative influence of each abiotic variable  
 144 across each principal component.

| <b>Abiotic variable</b>                                                    | <b>PC1</b> | <b>PC2</b> | <b>PC3</b> | <b>PC4</b> | <b>PC5</b> |
|----------------------------------------------------------------------------|------------|------------|------------|------------|------------|
| <i>Frequency spectrum<br/>(Temperature, <math>\beta_{temp}</math>)</i>     | 0.418      | -0.482     | 0.513      | -0.158     | -0.551     |
| <i>Temporal autocorrelation<br/>(Temperature, <math>a_{temp}</math>)</i>   | -0.586     | 0.207      | -0.065     | -0.583     | -0.519     |
| <i>Thermal range (<math>m</math>)</i>                                      | 0.176      | -0.563     | -0.744     | -0.315     | 0.024      |
| <i>Frequency spectrum<br/>(Precipitation, <math>\beta_{prec}</math>)</i>   | 0.509      | 0.403      | 0.112      | -0.675     | 0.332      |
| <i>Temporal autocorrelation<br/>(Precipitation, <math>a_{prec}</math>)</i> | -0.438     | -0.495     | 0.408      | -0.282     | 0.562      |

145

146

## 147 S5. Phylogenetically imputed Partial Least Squares Regression analyses

148 We initially carried out all pPLS analyses using only complete entries, omitting all populations  
149 missing estimates for any one variable, scaling and mean centring all predictor and response  
150 variables in each case. Across our dataset, no variable was missing from more than 6% of  
151 populations, except for the five variables describing the period of oscillation and its vital rate  
152 sensitivities, which were missing in 35-38% of populations (Table S2). To maximise our  
153 sample size ( $n$ ) across each regression analysis, we omitted populations with incomplete entries  
154 separately across subsets of our data relating to each transient metric ( $n_{\rho} = 1969$ ;  $n_{\psi} = 1263$ ;  
155  $n_{\bar{\rho}} = 2055$ ;  $n_{\bar{\rho}_{max}} = 2017$ ;  $n_{\underline{\rho}} = 2044$ ;  $n_{\underline{\rho}_{max}} = 1988$ ). However, we also repeated each analysis,  
156 with missing entries across the demographic variables estimated using phylogenetic  
157 imputation. To impute missing values, we first calculated the phylogenetic signal (Pagel's  $\lambda$ <sup>456</sup>)  
158 of each transient and sensitivity variable using the *phylosig* function from the '*phytools*'  
159 package<sup>441</sup>. Pagel's  $\lambda$  exists on the scale  $0 < \lambda < 1$ , with 0 indicating traits have evolved  
160 independently of phylogeny, and 1 representing a high phylogenetic signal. Next, for all  
161 variables exhibiting a strong phylogenetic signal (Pagel's  $\lambda \geq 0.65$ ) that differed significantly  
162 from 0 ( $p < 0.05$ ), missing entries were imputed assuming a Brownian motion evolutionary  
163 model using the *phylopars* function of the '*Rphylopars*' package<sup>457</sup>.

164 Here we present the outputs of our regression analyses involving this imputed data as  
165 further evidence for any emerging patterns in the relationships between the transient dynamics  
166 of populations, their exposure to gradients in environmental stochasticity (Fig. S3), and their  
167 vital-rate sensitivities (Fig. S4). Our analysis using this imputed data displays congruent  
168 patterns to those reported using only complete entries. Indeed, our observations of limited  
169 association between gradients in environmental stochasticity and patterns in the transient  
170 dynamics of populations are maintained within the imputed data (Fig. S3;  $r^2 < 0.006$ ), whereas



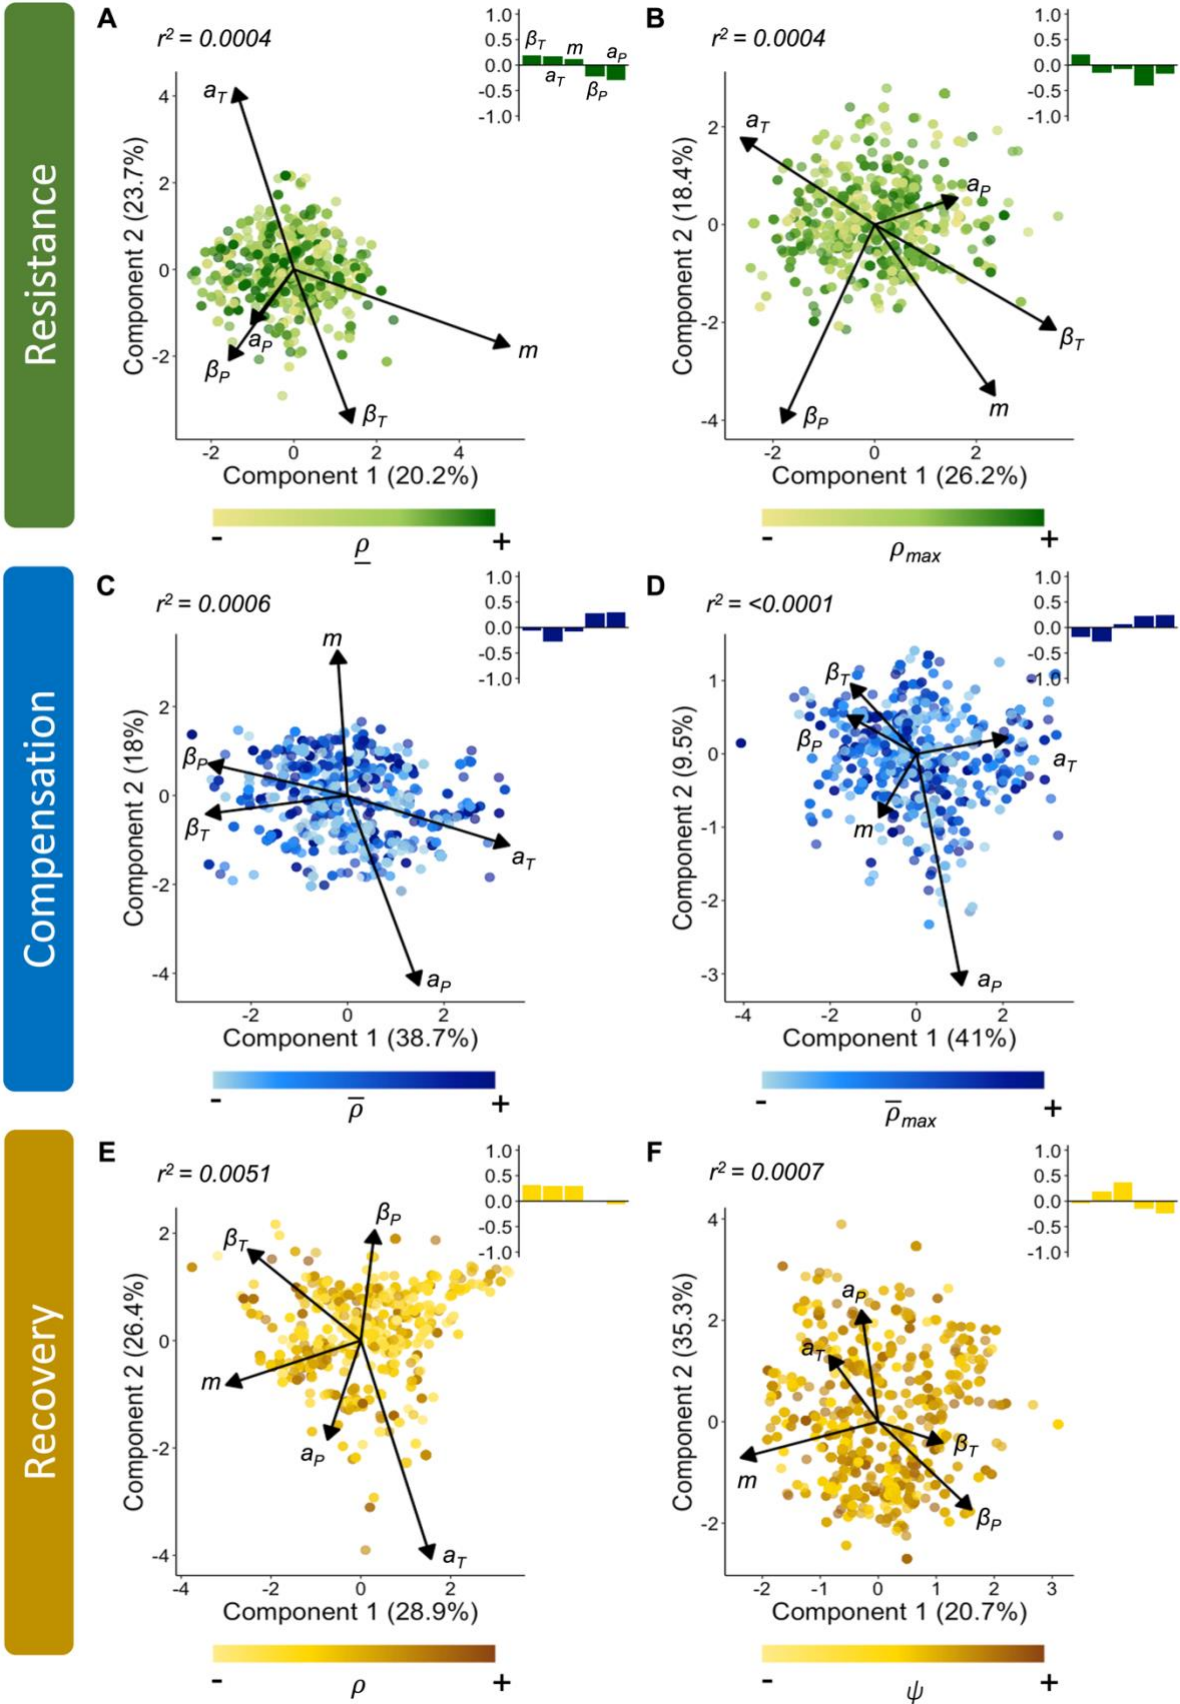

172 **Figure S3. The limited association between patterns across the demographic resilience**  
 173 **attributes of resistance (green), compensation (blue), and recovery (orange) and the**  
 174 **relative exposure of populations to environmental stochasticity is insensitive to**  
 175 **phylogenetic imputation.** Scores and loadings from a phylogenetically-weighted Partial  
 176 Least Squares regression analysis exploring the correlation between patterns in the variation  
 177 of the six transient metrics of **(A)** first-step attenuation ( $\underline{\rho}$ ), **(B)** maximal attenuation ( $\underline{\rho}_{max}$ ),  
 178 **(C)** reactivity ( $\bar{\rho}$ ), **(D)** maximal amplification ( $\bar{\rho}_{max}$ ), **(E)** damping ratio ( $\rho$ ), and **(F)** period of  
 179 oscillation ( $\psi$ ), and our five measures of environmental stochasticity, temperature frequency  
 180 spectrum ( $\beta_T$ ), temperature autocorrelation ( $a_T$ ), thermal range/magnitude ( $m$ ), precipitation  
 181 frequency spectrum ( $\beta_P$ ), and precipitation autocorrelation ( $a_P$ ) using a dataset with missing  
 182 entries estimated through phylogenetic imputation. Colour gradation reflects the relative  
 183 magnitude of each transient metric estimated for each population, with darker shades  
 184 indicating higher estimates. Insert barplots are the standardised regression coefficients ( $b$ )  
 185 highlighting the relative weighting of each abiotic variable in the overall capacity of each  
 186 model to explain variation within each transient metric ( $r^2$ ).

187

188 the predictive capacity of our imputed vital rate sensitivity variables remains almost identical  
 189 to those originally reported ( $r^2$ ; Fig S4). We note here that whilst each transient metric relating  
 190 to the resilience attributes of resistance and compensation, and their vital rate sensitivities all  
 191 displayed a strong phylogenetic signal (Pagel's  $\lambda > 0.94$ ,  $p < 0.001$ ; *see results*), this was not  
 192 the case for our measures of demographic recovery. Both the transient metrics of damping ratio  
 193 and period of oscillation displayed strong phylogenetic signal (Pagel's  $\lambda$ :  $\rho = 0.996$ ;  $\psi = 0.992$ ;  
 194  $p < 0.001$  in both cases), but their vital rate sensitivities did not (*see results*). Subsequently, we

195 were only able to examine patterns in the demographic selection pressures of recovery using  
 196 complete entries.

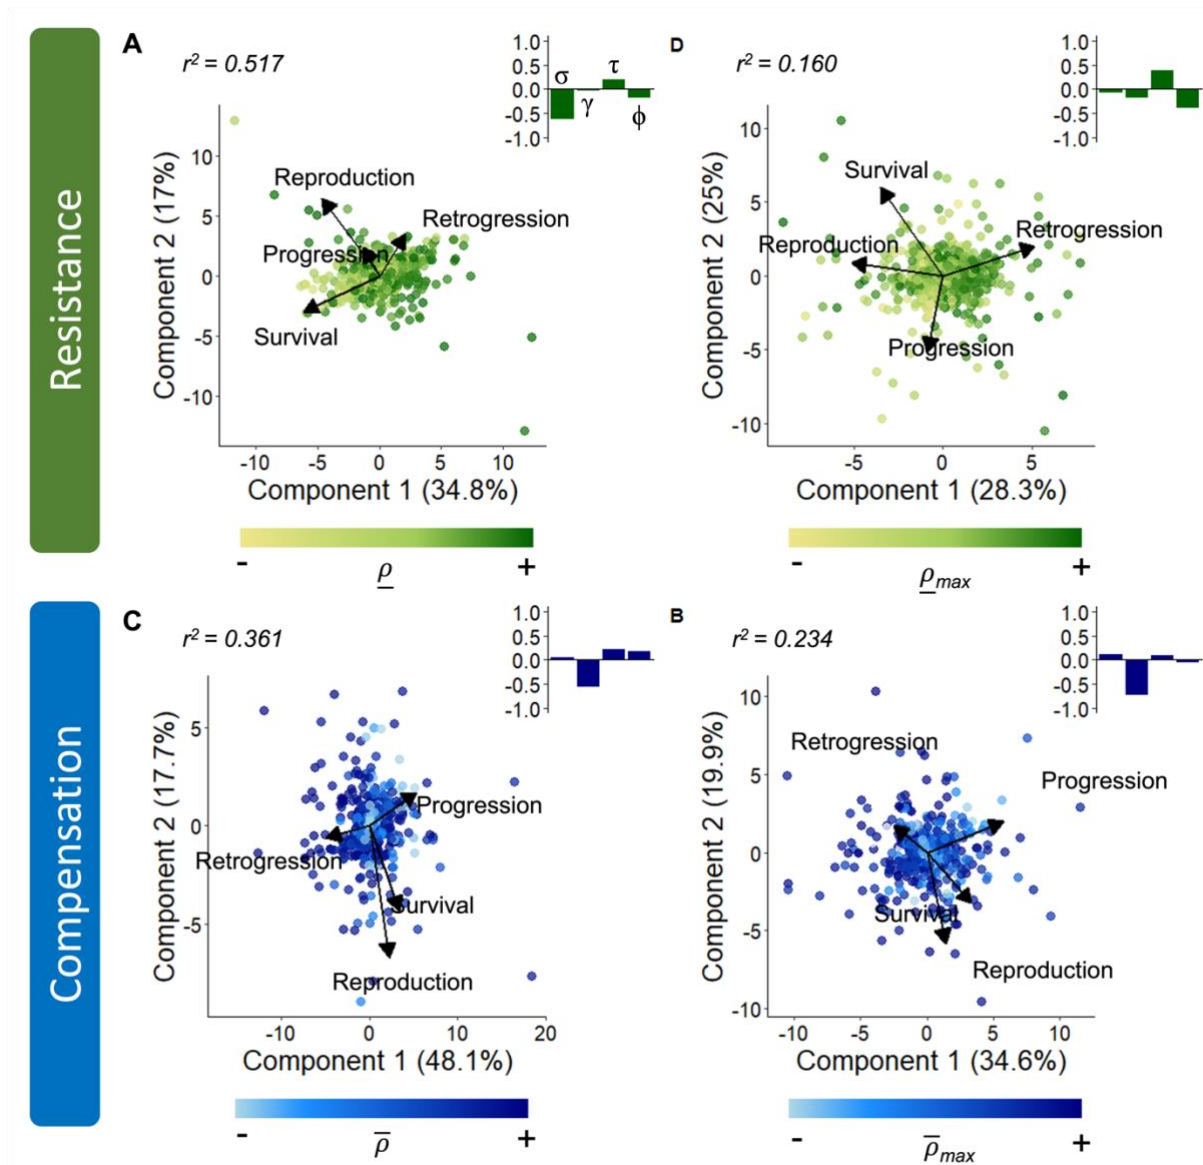

197

198 **Figure S4. Patterns within the vital rate sensitivities of the resilience attributes of**  
 199 **resistance (green) and compensation (blue) are insensitive to phylogenetic imputation.**

200 Scores and loadings from Partial Least Squares regression analysis of the sensitivity patterns

201 of the four metrics of transient dynamics (A) first-step attenuation ( $\rho$ ), (B) maximal

202 attenuation ( $\rho_{max}$ ), (C) reactivity ( $\bar{\rho}$ ), and (D) maximal amplification ( $\bar{\rho}_{max}$ ) with regards to

203 the vital rates of survival ( $\sigma$ ), progression ( $\gamma$ ), retrogression ( $\tau$ ), and reproduction ( $\phi$ ) using a  
204 dataset with missing demographic entries phylogenetically imputed. Note that the transient  
205 metrics of damping ratio and period of oscillation have been excluded from this analysis due  
206 to a limited phylogenetic signal within the vital rate sensitivity variables of these two metrics.

207 Colour gradation represents the magnitude of each transient metric recorded across each  
208 population, with darker shades indicating higher estimates. Insert barplots are the  
209 standardised regression coefficients ( $b$ ) highlighting the relative weighting of each vital rate  
210 in the overall capacity of each model to explain variation within each transient metric ( $r^2$ ).

211

212

213

214

215

216

217

218

219

220

221

222

223

## 224 S6. Accounting for population longevity

225 We quantified the exposure of each population, within our sample, to environmental  
226 stochasticity using local temperature and precipitation records collected during the 50 years  
227 prior to the collection of any demographic data. However, the significance of any abiotic  
228 patterns experienced by each population during this 50-year window is likely contingent on  
229 their longevity. Across a 50-year period long-lived species, with generations spanning multiple  
230 decades, will experience fewer generations than shorter-lived species thereby diminishing the  
231 observable impact of any selection pressures on their trait characteristics<sup>458</sup>. Thus, it was  
232 necessary we ensured that our capacity for exploring the selection pressures exerted by  
233 environmental stochasticity on the resilience attributes of natural populations was not inhibited  
234 by the inclusion of long-lived species.

235 To evaluate the influence of population longevity on our observations we repeated our  
236 phylogenetically weighted Partial Least Squares analyses evaluating the relationship between  
237 environmental stochasticity and the transient dynamics of populations using only short-lived  
238 species (Fig. S5). Each population was categorised as long- or short-lived according to its mean  
239 life expectancy ( $\eta_e$ ), which we estimated from its associated MPM using the R package  
240 ‘*IPMpack*’<sup>459</sup>. We then repeated our pPLS analyses using only populations for which  $\eta_e \leq 10$   
241 years ( $n = 1606$  populations). This threshold was selected to maximise the number of  
242 generations experienced by populations during our 50-year abiotic time series, whilst  
243 maintaining a suitable sample size for our analyses. Overall, whilst omitting longer-lived  
244 species did improve the predictive capacity our abiotic variables by an order of magnitude, the  
245 association between gradients in environmental variation and the resilience attributes of  
246 populations still remained negligible ( $r^2 < 0.001$ ; Fig. S5). Indeed, the absolute magnitude of  
247 the Pearson’s coefficients ( $|r|$ ) obtained when exploring the correlation between our measures

248 of environmental stochasticity and transient dynamics all reflected a limited correlation  
 249 between our abiotic and demographic variables ( $|r| < 0.03$ ; Table S4).

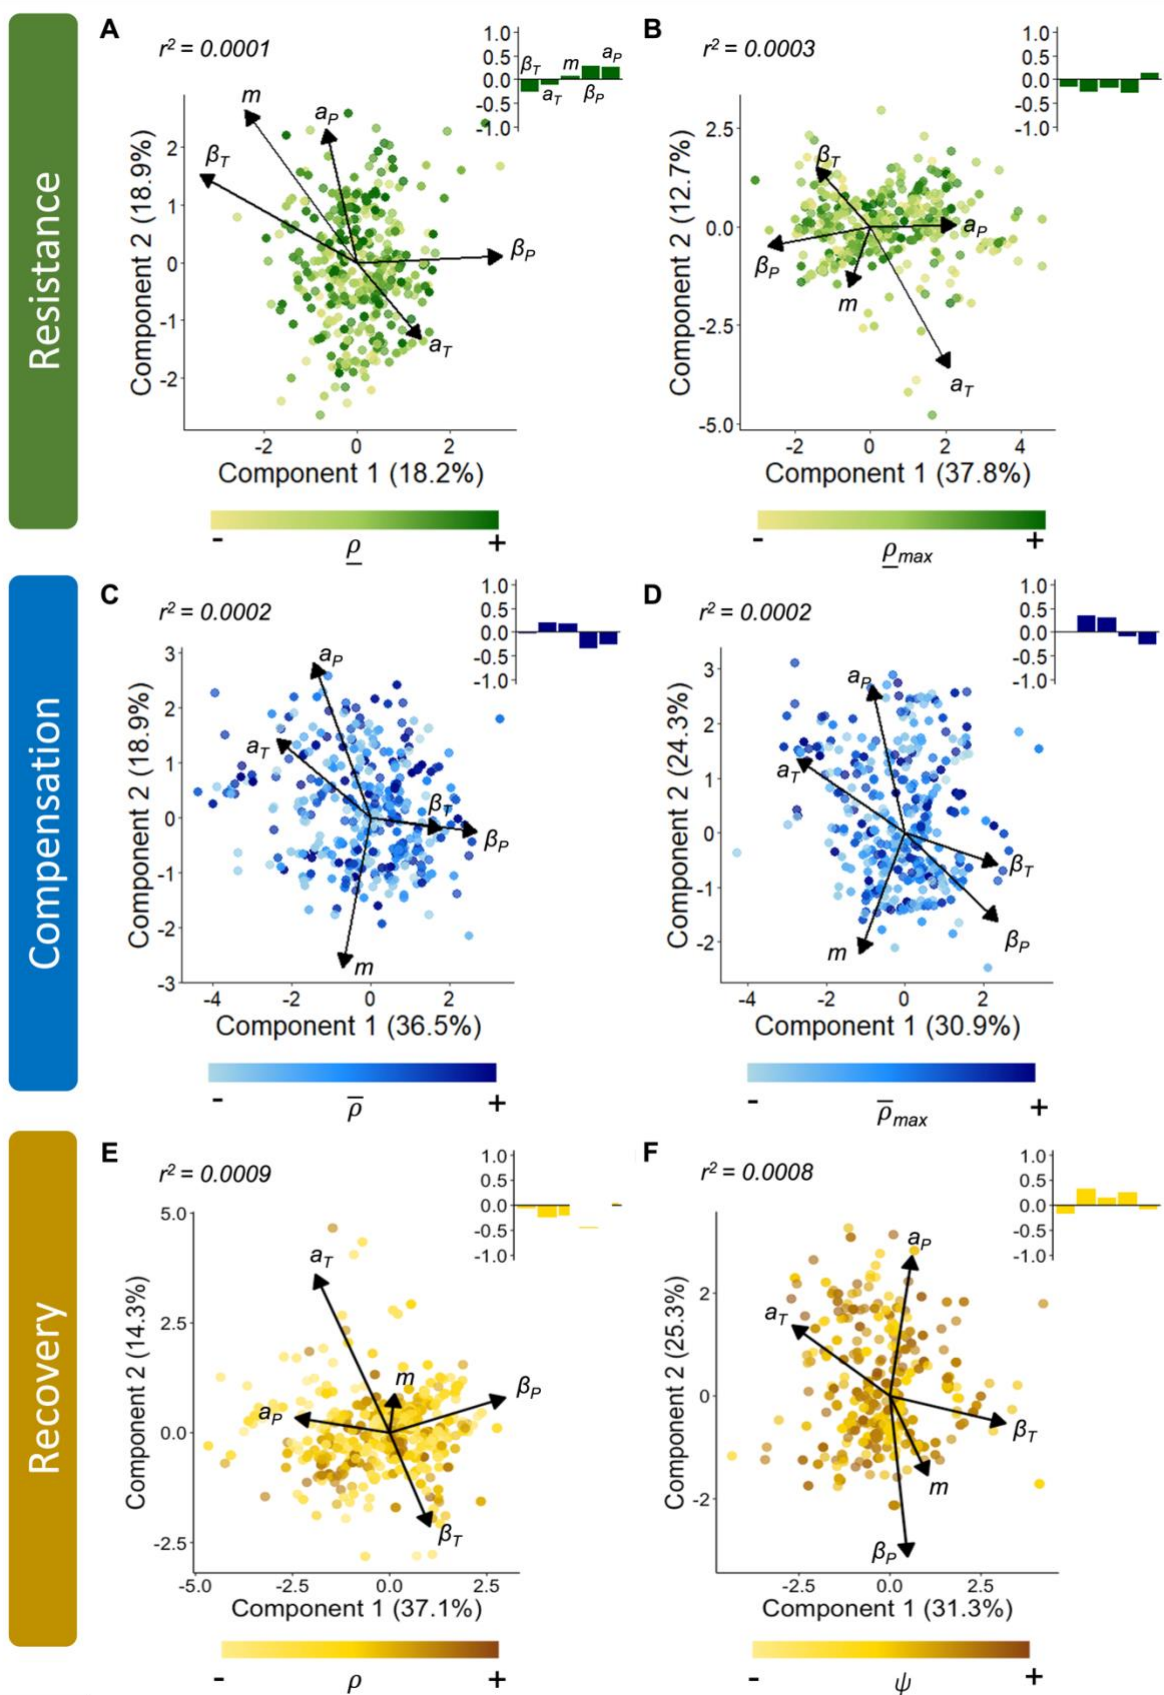

250 **Figure S5. The limited correlation between patterns across the demographic resilience**  
 251 **attributes of resistance (green), compensation (blue), and recovery (orange) and the**  
 252 **relative exposure of populations to environmental stochasticity is evident across short-**  
 253 **lived populations.** Scores and loadings from a phylogenetically-weighted Partial Least  
 254 Squares regression analysis exploring the correlation between patterns in the variation of the  
 255 six transient metrics of **(A)** first-step attenuation ( $\underline{\rho}$ ), **(B)** maximal attenuation ( $\underline{\rho}_{max}$ ), **(C)**  
 256 reactivity ( $\bar{\rho}$ ), **(D)** maximal amplification ( $\bar{\rho}_{max}$ ), **(E)** damping ratio ( $\rho$ ), and **(F)** period of  
 257 oscillation ( $\psi$ ), and our five measures of environmental stochasticity: temperature frequency  
 258 spectrum ( $\beta_T$ ), temperature autocorrelation ( $a_T$ ), thermal range/magnitude ( $m$ ), precipitation  
 259 frequency spectrum ( $\beta_P$ ), and precipitation autocorrelation ( $a_P$ ). Populations were selected for  
 260 the analysis on the basis that they possess life expectancies of  $\leq 10$  years. Colour gradation  
 261 reflects the relative magnitude of each transient metric estimated for each population, with  
 262 darker shades indicating higher estimates. Insert barplots are the standardised regression  
 263 coefficients ( $b$ ) highlighting the relative weighting of each abiotic variable in the overall  
 264 capacity of each model to explain variation within each transient metric ( $r^2$ ).

265

266 **Table S4. Patterns across the resilience attributes of resistance (green), compensation**  
 267 **(blue), and recovery (orange) of short-lived populations do not correlate with their**  
 268 **relative exposure to environmental stochasticity.** Using a phylogenetically-corrected  
 269 Pearson's test of correlation, we explored the correlation between the transient metrics of  
 270 first-step attenuation ( $\underline{\rho}$ ), maximal attenuation ( $\underline{\rho}_{max}$ ), reactivity ( $\bar{\rho}$ ), maximal amplification  
 271 ( $\bar{\rho}_{max}$ ), damping ratio ( $\rho$ ), and period of oscillation ( $\psi$ ), and each of our five measures of  
 272 environmental stochasticity: temperature frequency spectrum ( $\beta_T$ ), temperature  
 273 autocorrelation ( $a_T$ ), thermal range ( $m$ ), precipitation frequency spectrum ( $\beta_P$ ), and



274 precipitation autocorrelation ( $a_P$ ). Populations were selected for the analysis on the basis that  
 275 they possessed life expectancies of  $\leq 10$  years.

| <b>Transient metric</b>  | $\beta_T$ | $a_T$   | $m$     | $\beta_P$ | $a_P$   |
|--------------------------|-----------|---------|---------|-----------|---------|
| $\bar{\rho}$             | -0.0061   | 0.0078  | 0.0058  | -0.0108   | 0.0003  |
| $\bar{\rho}_{max}$       | -0.0054   | -0.0077 | 0.0070  | -0.0047   | -0.0022 |
| $\underline{\rho}$       | -0.0040   | -0.0001 | -0.0002 | 0.0047    | 0.0025  |
| $\underline{\rho}_{max}$ | -0.0055   | 0.0017  | -0.0051 | -0.0125   | 0.0086  |
| $\rho$                   | -0.0048   | 0.0029  | -0.0059 | -0.0252   | 0.0136  |
| $\psi$                   | -0.0196   | 0.0189  | <0.0001 | 0.0051    | -0.0075 |

276

277

278

279

280

281

282

283

284

285

286

287

288

## 289 S7. Accounting for legacy period length

290 Evaluating how climate drivers influence demographic processes requires the identification of  
291 appropriate intervals of time during which climatic characteristics can be expected to impact  
292 upon vital rate properties<sup>460</sup>. Accordingly, it was appropriate that we demonstrated that our  
293 observation, that the recent-past exposure of populations to environmental stochasticity does  
294 not predict their demographic resilience, is not sensitive to the breadth of time window  
295 (henceforth exposure legacy) used to quantify exposure to environmental stochasticity (Fig. S6  
296 – Fig. S9). Originally, using the CHELSA climate database<sup>446</sup>, we quantified exposure legacy  
297 across our population sample using high-resolution temperature and precipitation records  
298 covering the 50-years prior to demographic census (Supplementary S4). To illustrate the  
299 limited sensitivity of our observations to exposure legacy period length, we repeated our  
300 phylogenetically weighted Partial Least Squares analyses exploring the relationship between  
301 environmental stochasticity and the transient dynamics of populations using both 100-year  
302 (Fig. S6) and 5-year environmental legacy periods (Fig. S7). However, with the earliest  
303 CHELSA records dated from January 1901<sup>461</sup>, it was not possible for us to consistently estimate  
304 environmental legacy periods of 100-years across our entire population sample (which  
305 consisted of census start dates ranging from 1906 to 2016). Instead, to evaluate the relationship  
306 between environmental stochasticity and the transient dynamics of populations using 100-year  
307 environmental legacies we retained only studies for which it was possible to obtain 100-years  
308 of historical abiotic readings (915 populations). In both cases we demonstrate a negligible  
309 association between environmental stochasticity and the resilience attributes of populations ( $r^2$   
310  $< 0.003$ ;  $|r| < 0.04$ , Table S5 & Table S6). Moreover, this limited sensitivity continues to persist  
311 when considering only short-lived populations ( $\eta_e \leq 10$ ; Supplementary S6) across both 100-  
312 year (Fig. S8 & Table S7) and 5-year environmental legacy periods (Fig. S9 & Table S8).

Resistance

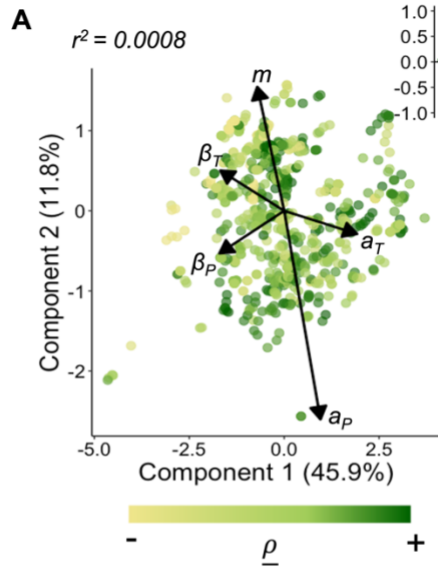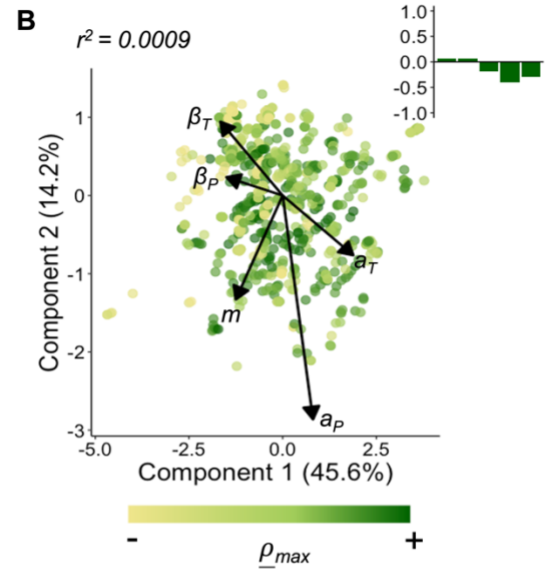

Compensation

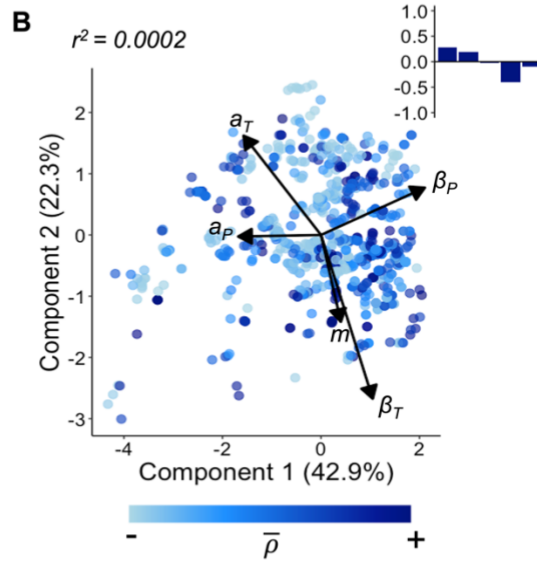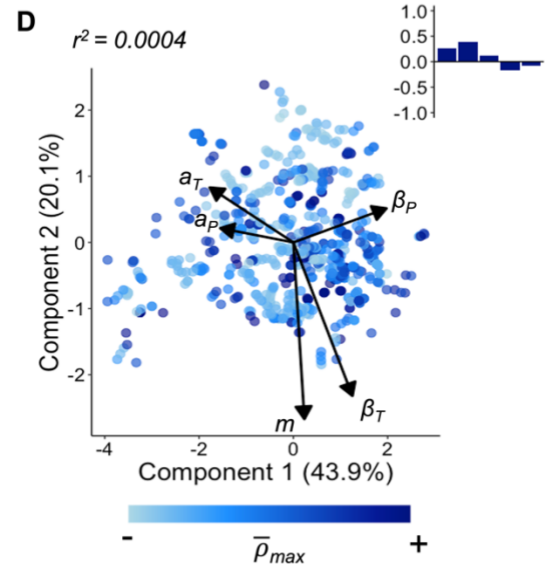

Recovery

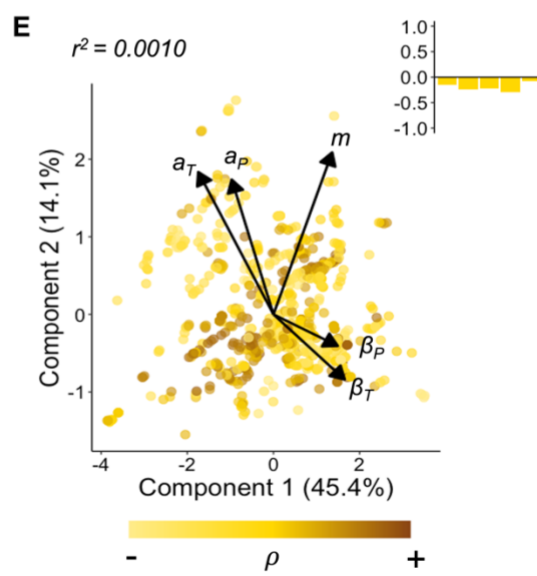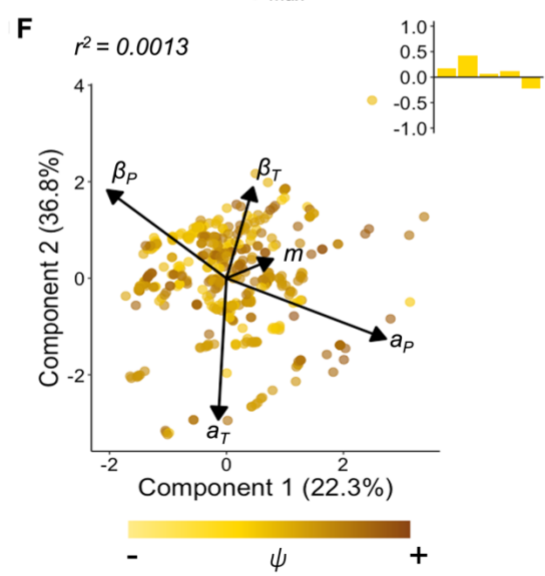

314 **Figure S6. The limited correlation between patterns across the demographic resilience**  
 315 **attributes of resistance (green), compensation (blue), and recovery (orange) and the**  
 316 **relative exposure of populations to environmental stochasticity persists when the**  
 317 **exposure of populations is calculated using 100-year legacy periods.** Scores and loadings  
 318 from a phylogenetically-weighted Partial Least Squares regression analysis exploring the  
 319 correlation between patterns in the variation of the six transient metrics of (A) first-step  
 320 attenuation ( $\underline{\rho}$ ), (B) maximal attenuation ( $\underline{\rho}_{max}$ ), (C) reactivity ( $\bar{\rho}$ ), (D) maximal  
 321 amplification ( $\bar{\rho}_{max}$ ), (E) damping ratio ( $\rho$ ), and (F) period of oscillation ( $\psi$ ), and our five  
 322 measures of environmental stochasticity: temperature frequency spectrum ( $\beta_T$ ), temperature  
 323 autocorrelation ( $a_T$ ), thermal range/magnitude ( $m$ ), precipitation frequency spectrum ( $\beta_P$ ), and  
 324 precipitation autocorrelation ( $a_P$ ). Colour gradation reflects the relative magnitude of each  
 325 transient metric estimated for each population, with darker shades indicating higher  
 326 estimates. Insert barplots are the standardised regression coefficients ( $b$ ) highlighting the  
 327 relative weighting of each abiotic variable in the overall capacity of each model to explain  
 328 variation within each transient metric ( $r^2$ ).

329

330 **Table S5. Patterns across the resilience attributes of resistance (green), compensation**  
 331 **(blue), and recovery (orange) do not correlate with the exposure of populations to**  
 332 **environmental stochasticity regimes over a 100-year period.** Using a phylogenetically-  
 333 corrected Pearson's test of correlation, we explored the correlation between the transient  
 334 metrics of first-step attenuation ( $\underline{\rho}$ ), maximal attenuation ( $\underline{\rho}_{max}$ ), reactivity ( $\bar{\rho}$ ), maximal  
 335 amplification ( $\bar{\rho}_{max}$ ), damping ratio ( $\rho$ ), and period of oscillation ( $\psi$ ), and each of our five  
 336 measures of environmental stochasticity: temperature frequency spectrum ( $\beta_T$ ), temperature

337 autocorrelation ( $a_T$ ), thermal range ( $m$ ), precipitation frequency spectrum ( $\beta_P$ ), and  
 338 precipitation autocorrelation ( $a_P$ ).

| <b>Transient metric</b>  | $\beta_T$ | $a_T$   | $m$     | $\beta_P$ | $a_P$   |
|--------------------------|-----------|---------|---------|-----------|---------|
| $\bar{\rho}$             | 0.0005    | 0.0055  | -0.0009 | -0.0112   | 0.0049  |
| $\bar{\rho}_{max}$       | -0.0010   | 0.0129  | 0.0029  | -0.0128   | 0.0062  |
| $\underline{\rho}$       | 0.0114    | -0.0173 | 0.0025  | 0.0201    | 0.0015  |
| $\underline{\rho}_{max}$ | 0.0109    | -0.0152 | 0.0151  | 0.0196    | 0.0022  |
| $\rho$                   | -0.0147   | 0.0072  | -0.0191 | -0.0183   | 0.0039  |
| $\psi$                   | -0.0014   | 0.0133  | -0.0017 | 0.0110    | -0.0177 |

339

340

341

342

343

344

345

346

347

348

349

350

351

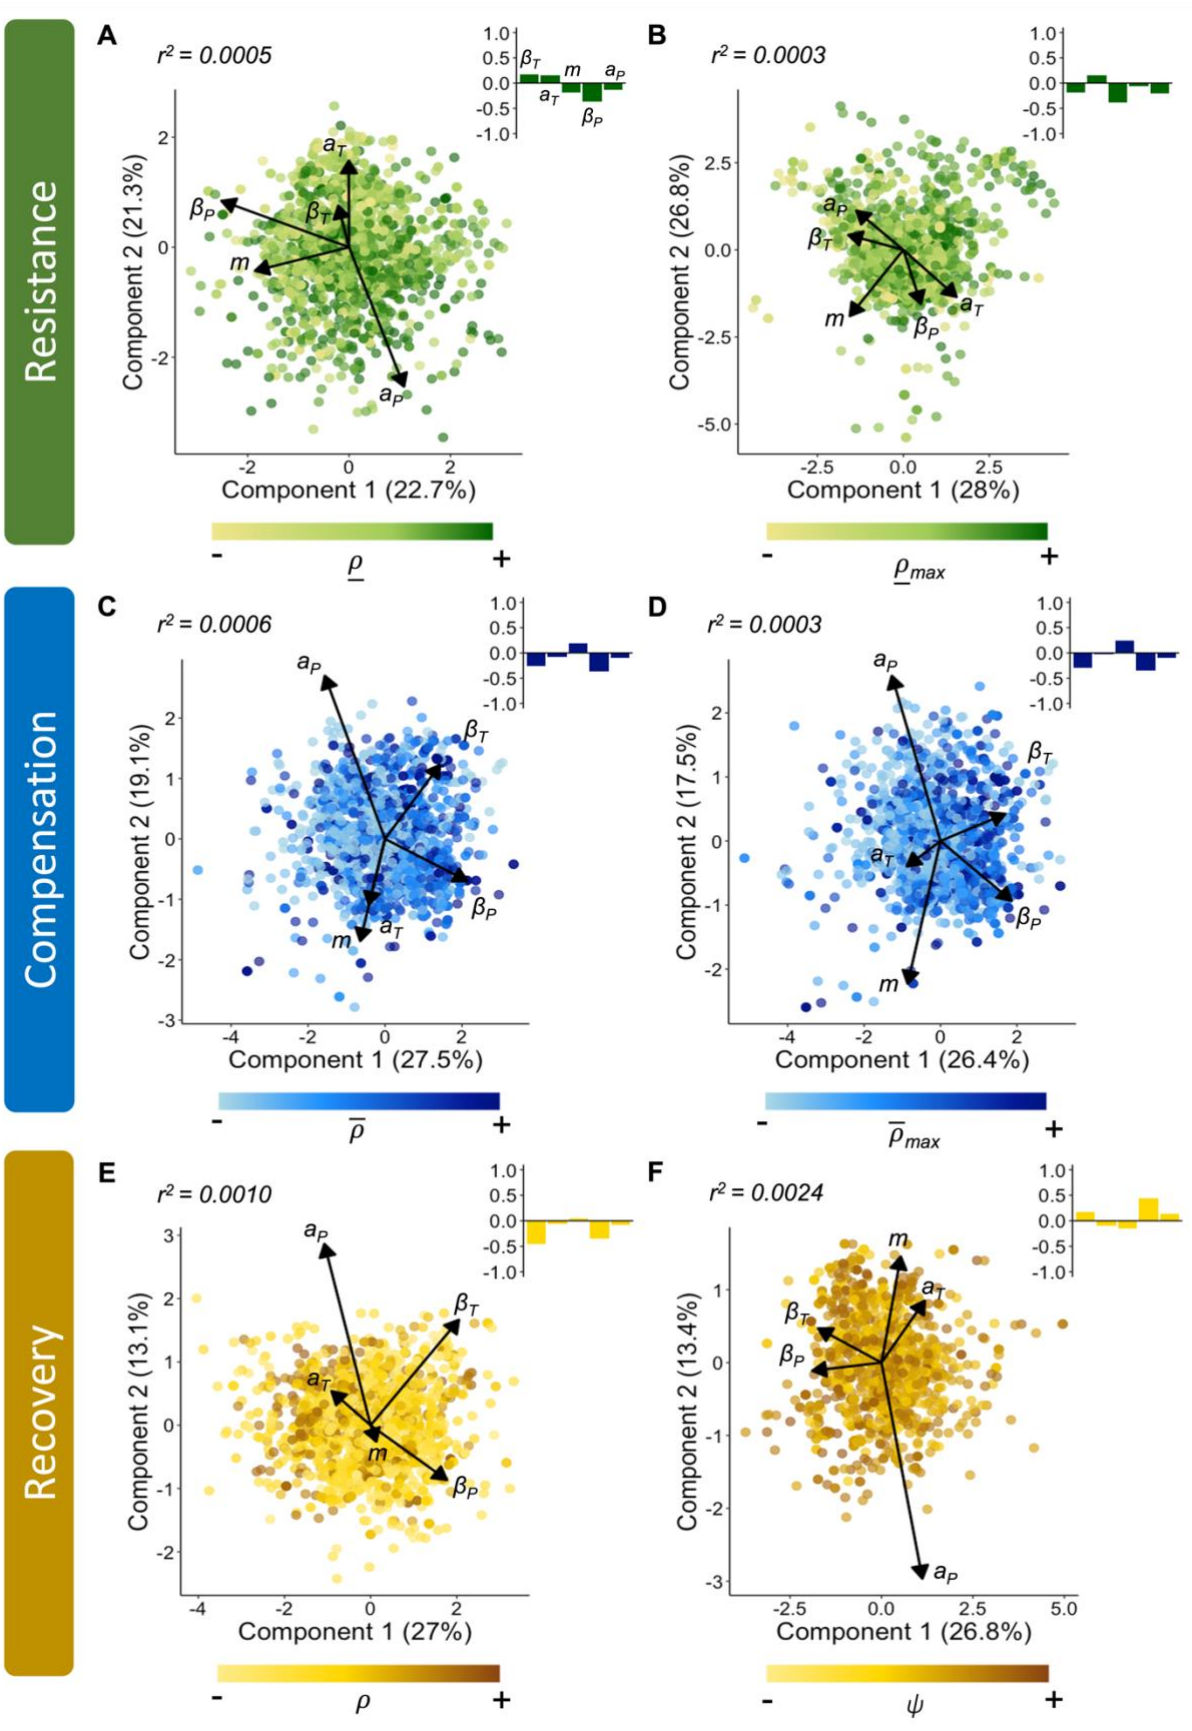

353 **Figure S7. The limited correlation between patterns across the demographic resilience**  
 354 **attributes of resistance (green), compensation (blue), and recovery (orange) and the**  
 355 **relative exposure of populations to environmental stochasticity persists when the**  
 356 **exposure of populations is calculated using a 5-year legacy period.** Scores and loadings  
 357 from a phylogenetically-weighted Partial Least Squares regression analysis exploring the  
 358 correlation between patterns in the variation of the six transient metrics of **(A)** first-step  
 359 attenuation ( $\underline{\rho}$ ), **(B)** maximal attenuation ( $\underline{\rho}_{max}$ ), **(C)** reactivity ( $\bar{\rho}$ ), **(D)** maximal  
 360 amplification ( $\bar{\rho}_{max}$ ), **(E)** damping ratio ( $\rho$ ), and **(F)** period of oscillation ( $\psi$ ), and our five  
 361 measures of environmental stochasticity: temperature frequency spectrum ( $\beta_T$ ), temperature  
 362 autocorrelation ( $a_T$ ), thermal range/magnitude ( $m$ ), precipitation frequency spectrum ( $\beta_P$ ), and  
 363 precipitation autocorrelation ( $a_P$ ). Colour gradation reflects the relative magnitude of each  
 364 transient metric estimated for each population, with darker shades indicating higher  
 365 estimates. Insert barplots are the standardised regression coefficients ( $b$ ) highlighting the  
 366 relative weighting of each abiotic variable in the overall capacity of each model to explain  
 367 variation within each transient metric ( $r^2$ ).

368

369 **Table S6. Patterns across the resilience attributes of resistance (green), compensation**  
 370 **(blue), and recovery (orange) do not correlate with the exposure of populations to**  
 371 **environmental stochasticity regimes over a 5-year period.** Using a phylogenetically-  
 372 corrected Pearson's test of correlation, we explored the correlation between the transient  
 373 metrics of first-step attenuation ( $\underline{\rho}$ ), maximal attenuation ( $\underline{\rho}_{max}$ ), reactivity ( $\bar{\rho}$ ), maximal  
 374 amplification ( $\bar{\rho}_{max}$ ), damping ratio ( $\rho$ ), and period of oscillation ( $\psi$ ), and each of our five  
 375 measures of environmental stochasticity: temperature frequency spectrum ( $\beta_T$ ), temperature



376 autocorrelation ( $a_T$ ), thermal range ( $m$ ), precipitation frequency spectrum ( $\beta_P$ ), and  
 377 precipitation autocorrelation ( $a_P$ ).

| <b>Transient metric</b>  | $\beta_T$ | $a_T$   | $m$     | $\beta_P$ | $a_P$   |
|--------------------------|-----------|---------|---------|-----------|---------|
| $\bar{\rho}$             | -0.0137   | 0.0023  | 0.0083  | -0.0191   | 0.0075  |
| $\bar{\rho}_{max}$       | -0.0110   | 0.0042  | 0.0075  | -0.0120   | 0.0046  |
| $\underline{\rho}$       | -0.0027   | -0.0038 | 0.0108  | 0.0151    | <0.0001 |
| $\underline{\rho}_{max}$ | 0.0099    | -0.0085 | 0.0139  | -0.0008   | 0.0083  |
| $\rho$                   | -0.0261   | 0.0069  | -0.0003 | -0.0210   | 0.0076  |
| $\psi$                   | 0.0266    | -0.0189 | -0.0122 | 0.0365    | -0.0086 |

378

379

380

381

382

383

384

385

386

387

388

389

390

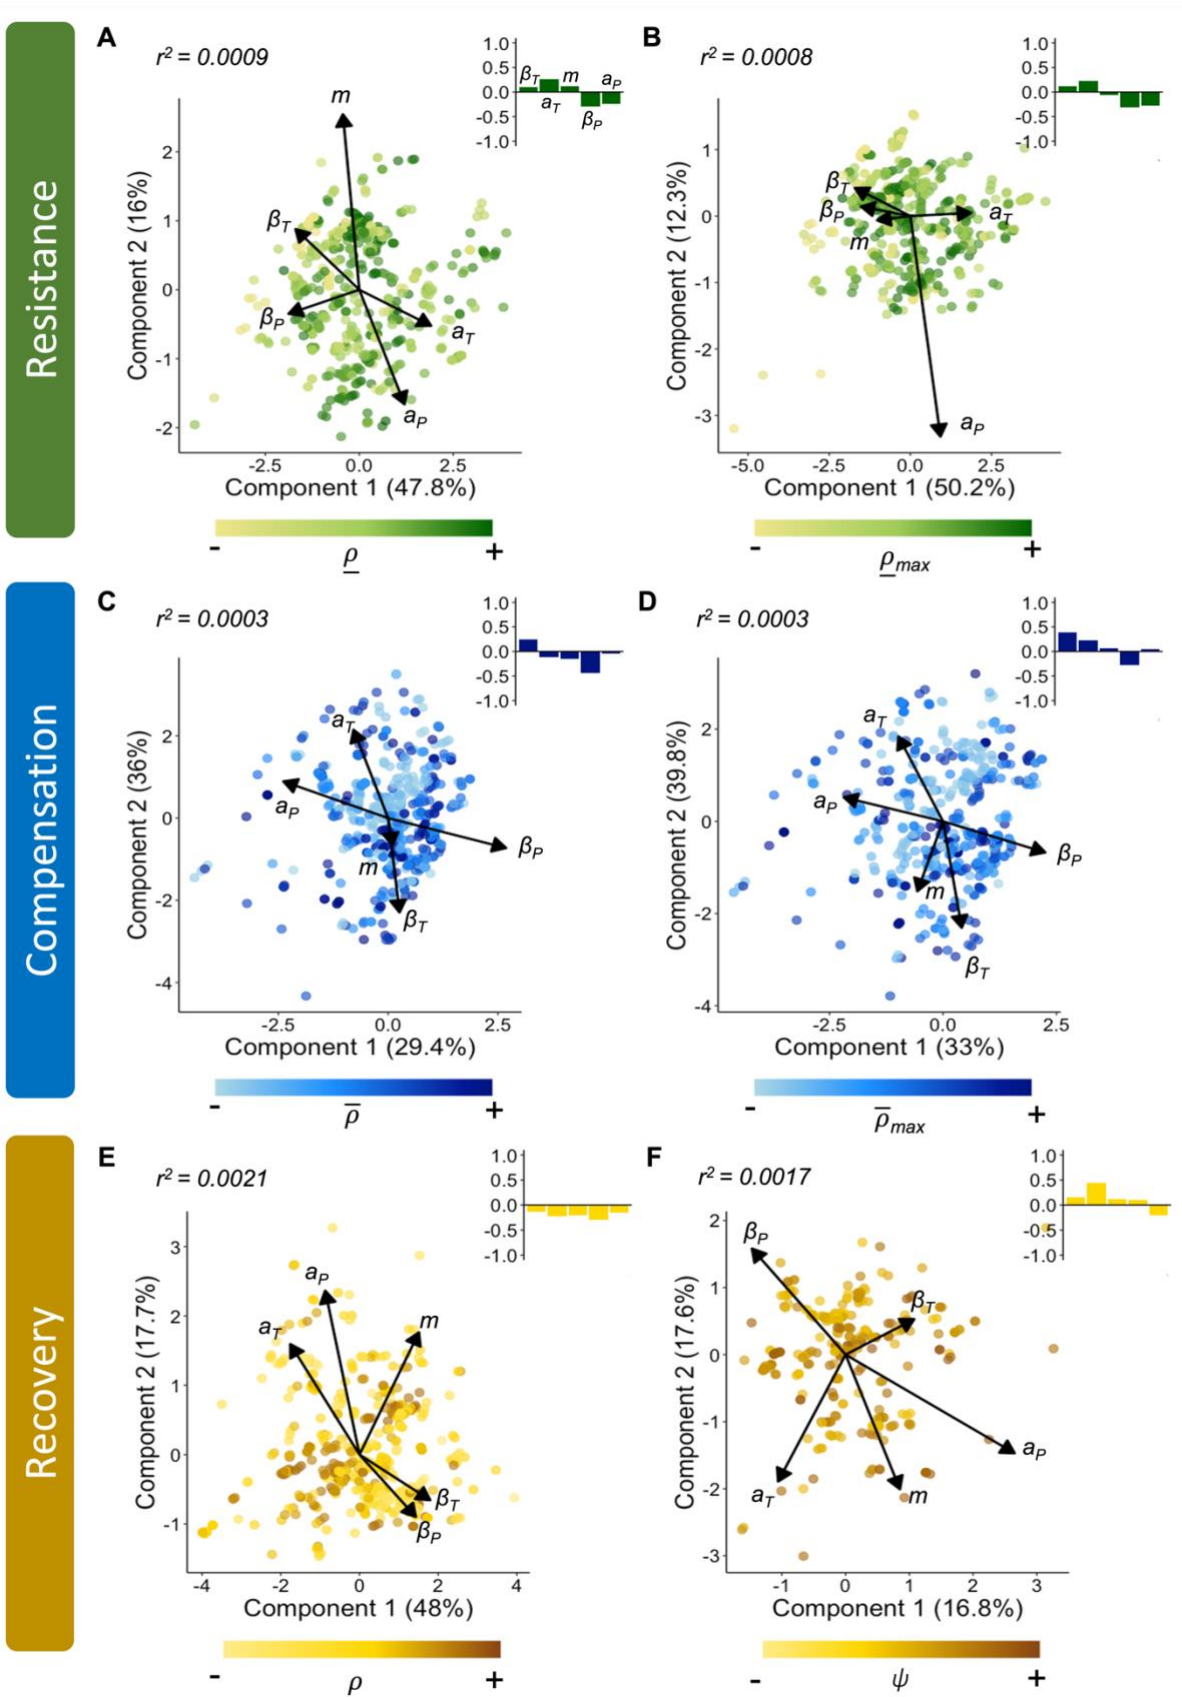

392 **Figure S8. The limited correlation between patterns across the demographic resilience**  
 393 **attributes of resistance (green), compensation (blue), and recovery (orange) and the**  
 394 **relative exposure of short-lived populations to environmental stochasticity remains**  
 395 **when the exposure of populations is calculated using 100-year legacy periods.** Scores  
 396 and loadings from a phylogenetically-weighted Partial Least Squares regression analysis  
 397 exploring the correlation between patterns in the variation of the six transient metrics of (A)  
 398 first-step attenuation ( $\underline{\rho}$ ), (B) maximal attenuation ( $\underline{\rho}_{max}$ ), (C) reactivity ( $\bar{\rho}$ ), (D) maximal  
 399 amplification ( $\bar{\rho}_{max}$ ), (E) damping ratio ( $\rho$ ), and (F) period of oscillation ( $\psi$ ), and our five  
 400 measures of environmental stochasticity: temperature frequency spectrum ( $\beta_T$ ), temperature  
 401 autocorrelation ( $a_T$ ), thermal range/magnitude ( $m$ ), precipitation frequency spectrum ( $\beta_P$ ), and  
 402 precipitation autocorrelation ( $a_P$ ). Colour gradation reflects the relative magnitude of each  
 403 transient metric estimated for each population, with darker shades indicating higher  
 404 estimates. Insert barplots are the standardised regression coefficients ( $b$ ) highlighting the  
 405 relative weighting of each abiotic variable in the overall capacity of each model to explain  
 406 variation within each transient metric ( $r^2$ ).

407

408 **Table S7. Patterns across the resilience attributes of resistance (green), compensation**  
 409 **(blue), and recovery (orange) in short-lived populations do not correlate with their**  
 410 **exposure to environmental stochasticity regimes over a 100-year period.** Using a  
 411 phylogenetically-corrected Pearson's test of correlation, we explored the correlation between  
 412 the transient metrics of first-step attenuation ( $\underline{\rho}$ ), maximal attenuation ( $\underline{\rho}_{max}$ ), reactivity ( $\bar{\rho}$ ),  
 413 maximal amplification ( $\bar{\rho}_{max}$ ), damping ratio ( $\rho$ ), and period of oscillation ( $\psi$ ), and each of  
 414 our five measures of environmental stochasticity: temperature frequency spectrum ( $\beta_T$ ),

415 temperature autocorrelation ( $a_T$ ), thermal range ( $m$ ), precipitation frequency spectrum ( $\beta_P$ ),  
 416 and precipitation autocorrelation ( $a_P$ ).

| Transient metric         | $\beta_T$ | $a_T$   | $m$     | $\beta_P$ | $a_P$   |
|--------------------------|-----------|---------|---------|-----------|---------|
| $\bar{\rho}$             | 0.0050    | -0.0018 | -0.0021 | -0.0122   | 0.0057  |
| $\bar{\rho}_{max}$       | 0.0047    | 0.0032  | 0.0044  | -0.0107   | 0.0084  |
| $\underline{\rho}$       | 0.0100    | -0.0177 | -0.0044 | 0.0203    | <0.0001 |
| $\underline{\rho}_{max}$ | 0.0114    | -0.0186 | 0.0087  | 0.0181    | 0.0018  |
| $\rho$                   | -0.0214   | 0.0092  | -0.0282 | -0.0243   | -0.0003 |
| $\psi$                   | -0.0038   | 0.0173  | 0.0025  | 0.0089    | -0.0175 |

417

418

419

420

421

422

423

424

425

426

427

428

429

Resistance

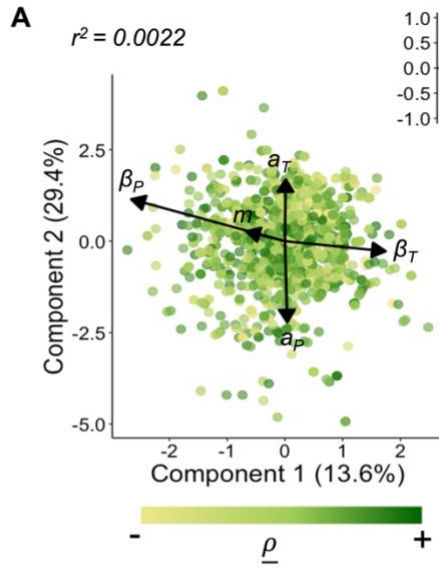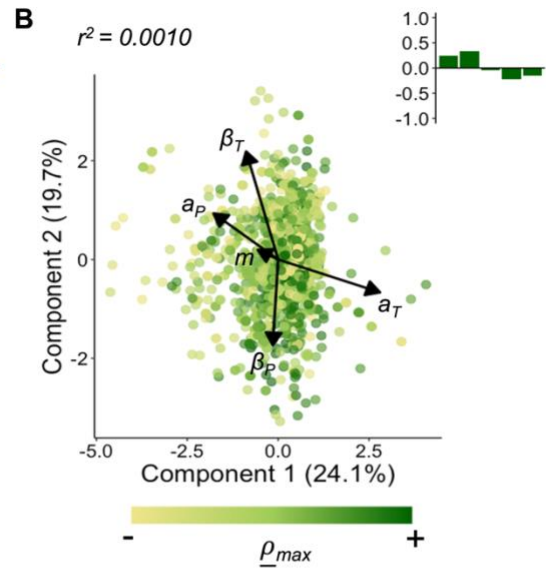

Compensation

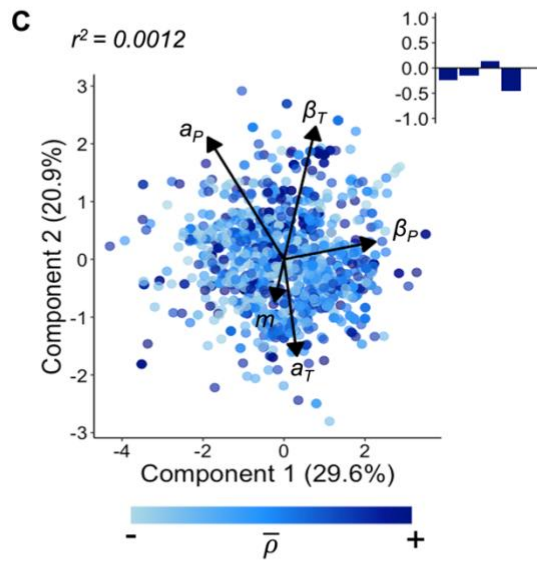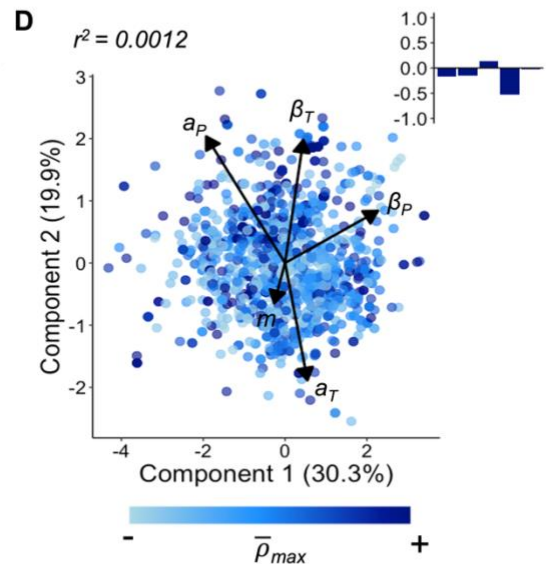

Recovery

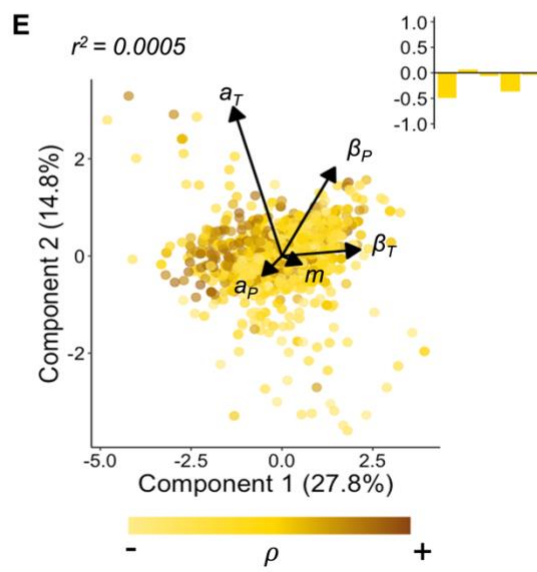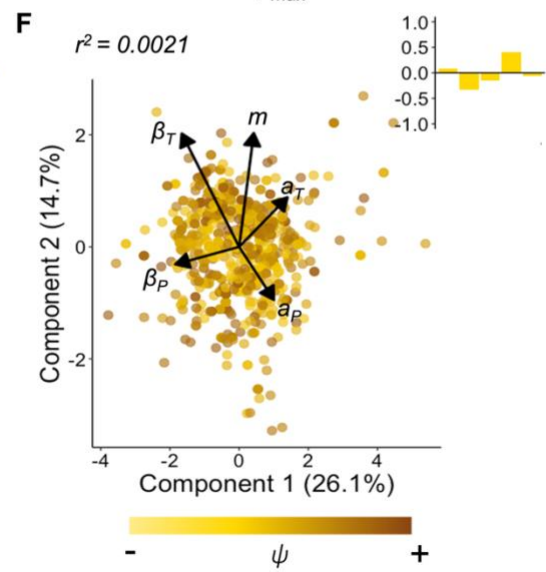

431 **Figure S9. The limited correlation between patterns across the demographic resilience**  
 432 **attributes of resistance (green), compensation (blue), and recovery (orange) and the**  
 433 **relative exposure of short-lived populations to environmental stochasticity remains**  
 434 **when the exposure of populations is calculated using 5-year legacy periods.** Scores and  
 435 loadings from a phylogenetically-weighted Partial Least Squares regression analysis  
 436 exploring the correlation between patterns in the variation of the six transient metrics of (A)  
 437 first-step attenuation ( $\underline{\rho}$ ), (B) maximal attenuation ( $\underline{\rho}_{max}$ ), (C) reactivity ( $\bar{\rho}$ ), (D) maximal  
 438 amplification ( $\bar{\rho}_{max}$ ), (E) damping ratio ( $\rho$ ), and (F) period of oscillation ( $\psi$ ), and our five  
 439 measures of environmental stochasticity: temperature frequency spectrum ( $\beta_T$ ), temperature  
 440 autocorrelation ( $a_T$ ), thermal range/magnitude ( $m$ ), precipitation frequency spectrum ( $\beta_P$ ), and  
 441 precipitation autocorrelation ( $a_P$ ). Colour gradation reflects the relative magnitude of each  
 442 transient metric estimated for each population, with darker shades indicating higher  
 443 estimates. Insert barplots are the standardised regression coefficients ( $b$ ) highlighting the  
 444 relative weighting of each abiotic variable in the overall capacity of each model to explain  
 445 variation within each transient metric ( $r^2$ ).

446

447 **Table S8. Patterns across the resilience attributes of resistance (green), compensation**  
 448 **(blue), and recovery (orange) in short-lived populations do not correlate with their**  
 449 **exposure to environmental stochasticity regimes over a 5-year period.** Using a  
 450 phylogenetically-corrected Pearson's test of correlation, we explored the correlation between  
 451 the transient metrics of first-step attenuation ( $\underline{\rho}$ ), maximal attenuation ( $\underline{\rho}_{max}$ ), reactivity ( $\bar{\rho}$ ),  
 452 maximal amplification ( $\bar{\rho}_{max}$ ), damping ratio ( $\rho$ ), and period of oscillation ( $\psi$ ), and each of  
 453 our five measures of environmental stochasticity: temperature frequency spectrum ( $\beta_T$ ),

454 temperature autocorrelation ( $a_T$ ), thermal range ( $m$ ), precipitation frequency spectrum ( $\beta_P$ ),  
 455 and precipitation autocorrelation ( $a_P$ ).

| 456 | <b>Transient metric</b>  | $\beta_T$ | $a_T$   | $m$     | $\beta_P$ | $a_P$   |
|-----|--------------------------|-----------|---------|---------|-----------|---------|
| 457 | $\bar{\rho}$             | -0.0140   | -0.0044 | 0.0054  | -0.0315   | 0.0182  |
| 458 | $\bar{\rho}_{max}$       | -0.0085   | -0.0061 | 0.0056  | -0.0324   | 0.0177  |
| 459 | $\underline{\rho}$       | -0.0188   | -0.0074 | 0.0043  | 0.0254    | 0.0103  |
| 460 | $\underline{\rho}_{max}$ | -0.0047   | -0.0213 | 0.0037  | 0.0088    | 0.0115  |
| 461 | $\rho$                   | -0.0189   | 0.0090  | -0.0041 | -0.0134   | 0.0033  |
| 462 | $\psi$                   | 0.0209    | -0.0261 | -0.0106 | 0.0329    | -0.0132 |

461

462

463

464

465

466

467

468

469

470

471

472

473

474 **References**

- 475 1. Salguero-Gómez, R. *et al.* The COMPADRE Plant Matrix Database: An open online  
476 repository for plant demography. *Journal of Ecology* **103**, 202–218 (2015).
- 477 2. Salguero-Gómez, R. *et al.* COMADRE: A global data base of animal demography.  
478 *Journal of Animal Ecology* **85**, 371–384 (2016).
- 479 3. Åberg, P. Measuring size and choosing category size for a transition matrix study of  
480 the seaweed *Ascophyllum nodosum*. *Marine Ecology Progress Series* **63**, 281–287  
481 (1990).
- 482 4. Araújo, R. M., Serrão, E. A., Sousa-Pinto, I. & Åberg, P. Spatial and temporal  
483 dynamics of furoid populations (*Ascophyllum nodosum* and *Fucus serratus*): A  
484 comparison between central and range edge populations. *PLoS ONE* **9**, 1–10 (2014).
- 485 5. Capdevila, P., Hereu, B., Riera, J. L. & Linares, C. Unravelling the natural dynamics  
486 and resilience patterns of underwater Mediterranean forests: insights from the  
487 demography of the brown alga *Cystoseira zosteroides*. *Journal of Ecology* **104**, 1799–  
488 1808 (2016).
- 489 6. Engel, C., Gaggiotti, O. E., Destombe, C. & Valero, M. Population dynamics and stage  
490 structure in a haploid-diploid red seaweed, *Gracilaria gracilis*. *Journal of Ecology* **89**,  
491 436–450 (2001).
- 492 7. Chapman, A. R. O. “Hard” data for matrix modelling of *Laminaria digitata*  
493 (*Laminariales*, *Phaeophyta*) populations. *Hydrobiologia* **260**, 263–267 (1993).
- 494 8. Nyman, M. A., Brown, M. T., Neushul, M. & Keogh, J. A. *Macrocystis pyrifera* in  
495 New Zealand: Testing two mathematical models for whole plant growth. *Journal of*  
496 *Applied Phycology* **2**, 249–257 (1990).



- 497 9. de Wreede, R. E. Demographic characteristics of *Pterygophora californica*  
498 (Laminariales, Phaeophyta). *Phycologia* **25**, 11–17 (1986).
- 499 10. Carroll, C. J. Modelling winter severity and harvest of moose: Impacts of nutrition and  
500 predation. (University of Alaska, 2013).
- 501 11. Kvalnes, T. *et al.* Harvest-induced phenotypic selection in an island population of  
502 moose, *Alces alces*. *Evolution (N Y)* **70**, 1486–1500 (2016).
- 503 12. Ericsson, G. & Wallin, K. Age-specific moose (*Alces alces*) mortality in a predator-free  
504 environment: Evidence for senescence in females. *Ecoscience* **8**, 157–163 (2001).
- 505 13. Wiederholt, R., Fernandez-Duque, E., Diefenbach, D. R. & Rudran, R. Modeling the  
506 impacts of hunting on the population dynamics of red howler monkeys (*Alouatta*  
507 *seniculus*). *Ecological Modelling* **221**, 2482–2490 (2010).
- 508 14. Beissinger, S. R., Wunderle, J. M., Meyers, J. M., Sæther, B. E. & Engen, S. Anatomy  
509 of a bottleneck: Diagnosing factors limiting population growth in the Puerto Rican  
510 Parrot. *Ecological Monographs* **78**, 185–203 (2008).
- 511 15. Finch, M., Vélez- Espino, L. A., Doka, S. E., Power, M. & Koops, M. A. *Recovery*  
512 *potential modelling of eastern sand darter (Ammocrypta pellucida) in Canada.* (2011).
- 513 16. Mercado-Molina, A. E., Sabat, A. M. & Yoshioka, P. M. Demography of the  
514 demosponge *Amphimedon compressa*: Evaluation of the importance of sexual versus  
515 asexual recruitment to its population dynamics. *Journal of Experimental Marine*  
516 *Biology and Ecology* **407**, 355–362 (2011).
- 517 17. Klok, C. *et al.* Analysis of population development and effectiveness of management  
518 in resident greylag geese *Anser anser* in the Netherlands. *Animal Biology* **60**, 373–393  
519 (2010).

- 520 18. Altwegg, R. & Anderson, M. D. Rainfall in arid zones: possible effects of climate  
521 change on the population ecology of blue cranes. *Functional Ecology* **23**, 1014–1021  
522 (2009).
- 523 19. Vélez-Espino, L. A. Population viability and perturbation analyses in remnant  
524 populations of the andean catfish *Astroblepus ubidiai*. *Ecology of Freshwater Fish* **14**,  
525 125–138 (2005).
- 526 20. Duckworth, G. D., Altwegg, R. & Harebottle, D. M. Demography and population  
527 ecology of the hadeda ibis (*Bostrychia hagedash*) at its expanding range edge in south  
528 africa. *Journal of Ornithology* **153**, 421–430 (2012).
- 529 21. Morris, W. F. *et al.* Low demographic variability in wild primate populations: Fitness  
530 impacts of variation, covariation, and serial correlation in vital rates. *American*  
531 *Naturalist* **177**, 14–28 (2011).
- 532 22. Morris, W. F. *et al.* Longevity can buffer plant and animal populations against  
533 changing climatic variability. *Ecology* **89**, 19–25 (2008).
- 534 23. Klavitter, J. L., Marzluff, J. M. & Vekasy, M. S. Abundance and demography of the  
535 hawaiian hawk: Is delisting warranted? *Journal of Wildlife Management* **67**, 165–176  
536 (2003).
- 537 24. Koivula, K., Pakanen, V. M., Rönkä, A. & Belda, E. J. Steep past and future  
538 population decline in an arctic wader: dynamics and viability of Baltic Temminck's  
539 stints *Calidris temminckii*. *Journal of Avian Biology* **39**, 329–340 (2008).
- 540 25. Barlow, J. & Boveng, P. Modelling age-specific mortality for marine mammal  
541 populations. *Mar Mamm Sci* **7**, 50–65 (1991).

- 542 26. Hostetler, J. A., Kneip, E., van Vuren, D. H. & Oli, M. K. Stochastic population  
543 dynamics of a montane ground-dwelling squirrel. *PLoS ONE* **7**, 1–10 (2012).
- 544 27. Harris, J. B. C. *et al.* Managing the long-term persistence of a rare cockatoo under  
545 climate change. *Journal of Applied Ecology* **49**, 785–794 (2012).
- 546 28. Cubaynes, S. *et al.* Density-dependent intraspecific aggression regulates survival in  
547 northern Yellowstone wolves (*Canis lupus*). *Journal of Animal Ecology* **83**, 1344–1356  
548 (2014).
- 549 29. Gaillard, J. & Yoccoz, N. G. Temporal variation in survival of mammals: A case of  
550 environmental canalization? *Ecology* **84**, 3294–3306 (2003).
- 551 30. Wintle, B. A., Bekessy, S. A., Venier, L. A., Pearce, J. L. & Chisholm, R. A. Utility of  
552 dynamic-landscape metapopulation models for sustainable forest management.  
553 *Conservation Biology* **19**, 1930–1943 (2005).
- 554 31. Hebblewhite, M. & Merrill, E. H. Demographic balancing of migrant and resident elk  
555 in a partially migratory population through forage-predation tradeoffs. *Oikos* **120**,  
556 1860–1870 (2011).
- 557 32. Raithel, J. D., Kauffman, M. J. & Pletscher, D. H. Impact of Spatial and Temporal  
558 Variation in Calf Survival on the Growth of Elk Populations. *Journal of Wildlife*  
559 *Management* **71**, 795–803 (2007).
- 560 33. Benton, T. G., Grant, A. & Clutton-Brock, T. H. Does environmental stochasticity  
561 matter? Analysis of red deer life-histories on Rum. *Evolutionary Ecology* **9**, 559–574  
562 (1995).
- 563 34. Spencer, R. J. & Thompson, M. B. Experimental Analysis of the Impact of Foxes on  
564 Freshwater Turtle Populations. *Conservation Biology* **19**, 845–854 (2005).

- 565 35. Zimmer-Shaffer, S. A., Briggler, J. T. & Millspaugh, J. J. Modeling the Effects of  
566 Commercial Harvest on Population Growth of River Turtles. *Chelonian Conservation*  
567 *and Biology* **13**, 227–236 (2014).
- 568 36. Congdon, J. D., Dunham, A. E. & van Loben Sels, R. C. Demographics of common  
569 Snapping Turtles (*Chelydra serpentina*): Implications for conservation and  
570 management of long-lived organisms. *American Zoologist* **34**, 397–408 (1994).
- 571 37. Cooch, E., Rockwell, R. F. & Brault, S. Retrospective analysis of demographic  
572 responses to environmental change: A lesser snow goose example. *Ecological*  
573 *Monographs* **71**, 377–400 (2001).
- 574 38. Wilbur, H. M. The Evolutionary and Mathematical Demography of the Turtle  
575 *Chrysemys picta*. *Ecology* **56**, 64–77 (1975).
- 576 39. Tinkle, D. W., Congdon, J. D. & Rosen, P. C. Nesting Frequency and Success:  
577 Implications for the Demography of Painted Turtles. *Ecology* **62**, 1426–1432 (1981).
- 578 40. Mitchell, J. C. Population Ecology and Life Histories of the Freshwater Turtles  
579 *Chrysemys picta* and *Sternotherus odoratus* in an Urban Lake. *Herpetological*  
580 *Monographs* **2**, 40 (1988).
- 581 41. Cornelisse, T. M., Bennett, M. K. & Letourneau, D. K. The Implications of Habitat  
582 Management on the Population Viability of the Endangered Ohlone Tiger Beetle  
583 (*Cicindela ohlone*) Metapopulation. *PLoS ONE* **8**, e71005 (2013).
- 584 42. Hayes, J. L. The population ecology of a natural population of the pierid butterfly  
585 *Colias alexandra*. *Oecologia* **49**, 188–200 (1981).
- 586 43. Attwell, C. A. M. Population ecology of the blue wildebeest *Connochaetes taurinus*  
587 *taurinus* in Zululand, South Africa. *African Journal of Ecology* **20**, 147–168 (1982).

- 588 44. Tucker, A. Ecology and demography of freshwater crocodiles (*Crocodylus johnstoni*)  
589 in the Lynd River of north Queensland. (University of Queensland, 1997).
- 590 45. Hutton, J. M. Population ecology of the Nile crocodile, *Crocodylus niloticus*, Laurenti  
591 1768, at Ngezi, Zimbabwe. (University of Harare, Harare, Zimbabwe., 1984).
- 592 46. Webb, J. K., Brook, B. W. & Shine, R. What makes a species vulnerable to extinction?  
593 Comparative life-history traits of two sympatric snakes. *Ecological Research* **17**, 59–  
594 67 (2002).
- 595 47. Oli, M. K. *et al.* Dynamics of leprosy in nine-banded armadillos: Net reproductive  
596 number and effects on host population dynamics. *Ecological Modelling* **350**, 100–108  
597 (2017).
- 598 48. Rodríguez-Barreras, R., Pérez, M. E., Mercado-Molina, A. E. & Sabat, A. M. Arrested  
599 recovery of *Diadema antillarum* population: Survival or recruitment limitation?  
600 *Estuarine, Coastal and Shelf Science* **163**, 167–174 (2015).
- 601 49. Waser, P. M. & Jones, W. T. Survival and Reproductive Effort in Banner-Tailed  
602 Kangaroo Rats. *Ecology* **72**, 771–777 (1991).
- 603 50. Hayman, D. T. S. *et al.* Endemic Lagos bat virus infection in *Eidolon helvum*.  
604 *Epidemiology and Infection* **140**, 2163–2171 (2012).
- 605 51. Goswami, V. R., Vasudev, D. & Oli, M. K. The importance of conflict-induced  
606 mortality for conservation planning in areas of human-elephant co-occurrence.  
607 *Biological Conservation* **176**, 191–198 (2014).
- 608 52. di Minin, E. & Griffiths, R. A. Viability analysis of a threatened amphibian population:  
609 Modelling the past, present and future. *Ecography* **34**, 162–169 (2011).

- 610 53. Fujiwara, M. & Zhou, C. Population dynamics of stage-structured sequential  
611 hermaphrodites. *Canadian Journal of Fisheries and Aquatic Sciences* **70**, 1296–1305  
612 (2013).
- 613 54. Holmes, E. E., York, A. E. & York, H. Using age structure to detect impacts on  
614 threatened populations: A case study with steller sea lions. *Conservation Biology* **17**,  
615 1794–1806 (2003).
- 616 55. Altwegg, R., Jenkins, A. & Abadi, F. Nestboxes and immigration drive the growth of  
617 an urban peregrine falcon *Falco peregrinus* population. *IBIS* **156**, 107–115 (2013).
- 618 56. Kerbiriou, C., le Viol, I., Bonnet, X. & Robert, A. Dynamics of a northern fulmar  
619 (*Fulmarus glacialis*) population at the southern limit of its range in Europe. *Population*  
620 *Ecology* **54**, 295–304 (2012).
- 621 57. Lee, D. E., Bond, M. L., Kissui, B. M., Kiwango, Y. A. & Bolger, D. T. Spatial  
622 variation in giraffe demography: A test of 2 paradigms. *Journal of Mammalogy* **97**,  
623 1015–1025 (2016).
- 624 58. Strauss, M. K. L., Kilewo, M., Rentsch, D. & Packer, C. Food supply and poaching  
625 limit giraffe abundance in the Serengeti. *Population Ecology* **57**, 505–516 (2015).
- 626 59. Krüger, O., Grünkorn, T. & Struwe-Juhl, B. The return of the white-tailed eagle  
627 (*Haliaeetus albicilla*) to northern Germany: Modelling the past to predict the future.  
628 *Biological Conservation* **143**, 710–721 (2010).
- 629 60. Monchot, H., Fernandez, P. & Gaillard, J. M. Paleodemographic analysis of a fossil  
630 porcupine (*Hystrix refoffa* Gervais, 1852) population from the Upper Pleistocene site  
631 of Geula Cave (Mount Carmel, Israel). *Journal of Archaeological Science* **39**, 3027–  
632 3038 (2012).

- 633 61. Frazer, N. B., Whitfield Gibbons, J. & Greene, J. L. Life history and demography of  
634 the common mud turtle *Kinosternon subrubrum* in south carolina, USA. *Ecology* **72**,  
635 2218–2231 (1991).
- 636 62. Spinage, C. A. African Ungulate Life Tables. *Ecology* **53**, 645–652 (1972).
- 637 63. Suzuki, A., Kobayashi, A., Nakamura, H. & Takasu, F. Population viability analysis of  
638 the japanese rock ptarmigan *Lagopus muta japonica* in japan. *Wildlife Biology* **19**,  
639 339–346 (2013).
- 640 64. Hadley, G. L., Rotella, J. J., Garrott, R. A. & Nichols, J. D. Variation in probability of  
641 first reproduction of weddell seals. *Journal of Animal Ecology* **75**, 1058–1070 (2006).
- 642 65. Blomquist, G. E., Sade, D. S. & Berard, J. D. Rank-related fitness differences and their  
643 demographic pathways in semi-free-ranging rhesus macaques (*Macaca mulatta*).  
644 *International Journal of Primatology* **32**, 193–208 (2011).
- 645 66. Kessler, M. J. *et al.* Long-term effects of tetanus toxoid inoculation on the demography  
646 and life expectancy of the Cayo Santiago rhesus macaques. *American Journal of*  
647 *Primatology* **77**, 211–221 (2015).
- 648 67. Hernández-Pacheco, R. *et al.* Demographic variability and density-dependent  
649 dynamics of a free-ranging rhesus macaque population. *American Journal of*  
650 *Primatology* **75**, 1152–1164 (2013).
- 651 68. Crawford, B. A., Maerz, J. C., Nibbelink, N. P., Buhlmann, K. A. & Norton, T. M.  
652 Estimating the consequences of multiple threats and management strategies for semi-  
653 aquatic turtles. *Journal of Applied Ecology* **51**, 359–366 (2014).

- 654 69. Ozgul, A., Oli, M. K., Armitage, K. B., Blumstein, D. T. & van Vuren, D. H. Influence  
655 of local demography on asymptotic and transient dynamics of a yellow-bellied marmot  
656 metapopulation. *American Naturalist* **173**, 517–530 (2009).
- 657 70. Edmunds, P. J. A quarter-century demographic analysis of the Caribbean coral,  
658 *Orbicella annularis*, and projections of population size over the next century.  
659 *Limnology and Oceanography* **60**, 840–855 (2015).
- 660 71. Hernandez-Pacheco, R., Hernandez-Delgado, E. A. & Sabat, A. M. Demographics of  
661 bleaching in a major Caribbean reef-building coral: *Montastraea annularis*. *Ecosphere*  
662 **2**, 1–13 (2011).
- 663 72. Hughes, T. P. & Tanner, J. E. Recruitment Failure, Life Histories, and Long-Term  
664 Decline of Caribbean Corals. *Ecology* **81**, 2250–2263 (2000).
- 665 73. Wang, M. *et al.* On the sustainability of a reintroduced crested ibis population in  
666 qinling mountains, shaanxi, central china. *Restoration Ecology* **25**, 261–268 (2017).
- 667 74. Dudas, S. E., Dower, J. F. & Anholt, B. R. Invasion dynamics of the varnish clam  
668 (*Nuttallia obscurata*): A matrix demographic modelling approach. *Ecology* **88**, 2084–  
669 2093 (2007).
- 670 75. Chitwood, M. C., Lashley, M. A., Kilgo, J. C., Moorman, C. E. & Deperno, C. S.  
671 White-tailed deer population dynamics and adult female survival in the presence of a  
672 novel predator. *Journal of Wildlife Management* **79**, 211–219 (2015).
- 673 76. Fujiwara, M., Mohr, M. S. & Greenberg, A. The Effects of Disease-Induced Juvenile  
674 Mortality on the Transient and Asymptotic Population Dynamics of Chinook Salmon  
675 (*Oncorhynchus tshawytscha*). *PLoS ONE* **9**, e85464 (2014).



- 676 77. Wilson, P. H. Using Population Projection Matrices to Evaluate Recovery Strategies  
677 for Snake River Spring and Summer Chinook Salmon. *Conservation Biology* **17**, 782–  
678 794 (2003).
- 679 78. Fisher, D. O., Hoyle, S. D. & Blomberg, S. P. Population dynamics and survival of an  
680 endangered wallaby: A comparison of four methods. *Ecological Applications* **10**, 901–  
681 910 (2000).
- 682 79. Clutton-Brock, T. H., Price, O. F., Albon, S. D. & Jewell, P. A. Early development and  
683 population fluctuations in soay sheep. *Journal of Animal Ecology* **61**, 381–396 (1992).
- 684 80. Coulson, T., Gaillard, J. M. & Festa-Bianchet, M. Decomposing the variation in  
685 population growth into contributions from multiple demographic rates. *Journal of*  
686 *Animal Ecology* **74**, 789–801 (2005).
- 687 81. Johnson, H. E., Mills, L. S. & Stephenson, T. R. Population-specific vital rate  
688 contributions influence management of an endangered ungulate. *Ecological*  
689 *Applications* **20**, 1753–1765 (2010).
- 690 82. Rubin, E. S., Boyce, W. M. & Caswell-Chen, E. P. Modeling demographic processes  
691 in an endangered population of bighorn sheep. *Journal of Wildlife Management* **66**,  
692 796–810 (2002).
- 693 83. Balme, G. A., Slotow, R. & Hunter, L. T. B. Impact of conservation interventions on  
694 the dynamics and persistence of a persecuted leopard (*Panthera pardus*) population.  
695 *Biological Conservation* **142**, 2681–2690 (2009).
- 696 84. Linares, C. & Doak, D. F. Forecasting the combined effects of disparate disturbances  
697 on the persistence of long-lived gorgonians: A case study of *Paramuricea clavata*.  
698 *Marine Ecology Progress Series* **402**, 59–68 (2010).

- 699 85. Linares, C., Doak, D. F., Coma, R., Diaz, D. & Zabala, M. Life history and viability of  
700 a long-lived marine invertebrate: The octocoral *Paramuricea clavata*. *Ecology* **88**, 918–  
701 928 (2007).
- 702 86. Boveng, P. L., Hoef, J. M. v., Withrow, D. E. & London, J. M. A Bayesian Analysis of  
703 Abundance, Trend, and Population Viability for Harbor Seals in Iliamna Lake, Alaska.  
704 *Risk Analysis* **38**, 1988–2009 (2018).
- 705 87. Finkelstein, M. E., Doak, D. F., Nakagawa, M., Sievert, P. R. & Klavitter, J.  
706 Assessment of demographic risk factors and management priorities: impacts on  
707 juveniles substantially affect population viability of a long-lived seabird. *Animal*  
708 *Conservation* **13**, 148–156 (2010).
- 709 88. Wolf, A. J. *et al.* Variation in vital-rate sensitivity between populations of Texas  
710 horned lizards. *Population Ecology* **56**, 619–631 (2014).
- 711 89. Lasker, H. R. Population growth of a gorgonian coral: equilibrium and non-  
712 equilibrium sensitivity to changes in life history variables. *Oecologia* **86**, 503–509  
713 (1991).
- 714 90. Bramanti, L., Iannelli, M., Fan, T. Y. & Edmunds, P. J. Using demographic models to  
715 project the effects of climate change on scleractinian corals: *Pocillopora damicornis* as  
716 a case study. *Coral Reefs* **34**, 505–515 (2015).
- 717 91. Tanner, J. E. Interspecific competition reduces fitness in scleractinian corals. *Journal*  
718 *of Experimental Marine Biology and Ecology* (1997) doi:10.1016/S0022-  
719 0981(97)00024-5.

- 720 92. Mogollones, S. C., Rodríguez, D. J., Hernández, O. & Barreto, G. R. A demographic  
721 study of the Arrau Turtle (*Podocnemis expansa*) in the middle Orinoco River,  
722 Venezuela. *Chelonian Conservation and Biology* **9**, 79–89 (2010).
- 723 93. Wich, S. A. *et al.* Demography and life history of Thomas langurs (*Presbytis thomasi*).  
724 *American Journal of Primatology* **69**, 641–651 (2007).
- 725 94. Dunham, A. E., Erhart, E. M., Overdorff, D. J. & Wright, P. C. Evaluating effects of  
726 deforestation, hunting, and El Niño events on a threatened lemur. *Biological*  
727 *Conservation* **141**, 287–297 (2008).
- 728 95. Lawler, R. R. *et al.* Demography of Verreaux’s sifaka in a stochastic rainfall  
729 environment. *Oecologia* **161**, 491–504 (2009).
- 730 96. Bjørkvoll, E. *et al.* Demographic buffering of life histories? Implications of the choice  
731 of measurement scale. *Ecology* **97**, 40–47 (2016).
- 732 97. Otjacques, W., de Laender, F. & Kestemont, P. Discerning the causes of a decline in a  
733 common European fish, the roach (*Rutilus rutilus* L.): A modelling approach.  
734 *Ecological Modelling* **322**, 92–100 (2016).
- 735 98. Watsa, M. Growing up tamarin: Morphology, reproduction, and population  
736 demography of sympatric free-ranging *Saguinus fuscicollis* and *S. imperator*.  
737 (Washington University, 2013).
- 738 99. Pérez-Mendoza, H. A. *et al.* Demographic importance of the life-cycle components in  
739 *Sceloporus grammicus*. *Herpetologica* **69**, 411–435 (2013).
- 740 100. Zúñiga-Vega, J. J., Méndez-de La Cruz, F. R. & Cuellar, O. Demography of the lizard  
741 *Sceloporus grammicus*: Exploring temporal variation in population dynamics.  
742 *Canadian Journal of Zoology* **86**, 1397–1409 (2008).

- 743 101. Zúñiga-Vega, J. J. *et al.* Relative importance of reproductive life-history paths in one  
744 population of the lizard *Sceloporus grammicus*. *Amphibia-Reptilia* **33**, 401–413  
745 (2012).
- 746 102. Ortega-León, A. M., Smith, E. R., Zúñiga-Vega, J. J. & Méndez-de La Cruz, F. R.  
747 Growth and demography of one population of the lizard *Sceloporus mucronatus*  
748 *mucronatus*. *Western North American Naturalist* **67**, 492–502 (2007).
- 749 103. Berryman, A. A. Population dynamics of the fir engraver, *Scolytus ventralis*,  
750 (Coleoptera: Scolytidae): I. analysis of population behaviour and survival from 1964 to  
751 1971. *The Canadian Entomologist* **105**, 1465–1488 (1973).
- 752 104. Luo, J. & Fox, B. J. Life-Table Comparisons between Two Ground Squirrels. *Journal*  
753 *of Mammalogy* **71**, 364–370 (1990).
- 754 105. Szostek, K. L. & Becker, P. H. Terns in trouble: demographic consequences of low  
755 breeding success and recruitment on a common tern population in the German Wadden  
756 Sea. *Journal of Ornithology* **153**, 313–326 (2012).
- 757 106. LaHaye, W. S., Zimmerman, G. S. & Gutiérrez, R. J. Temporal variation in the vital  
758 rates of an insular population of Spotted Owls (*Strix occidentalis occidentalis*):  
759 Contrasting effects of weather. *Auk* **121**, 1056–1069 (2004).
- 760 107. Gamelon, M. *et al.* Making use of harvest information to examine alternative  
761 management scenarios: a body weight-structured model for wild boar. *Journal of*  
762 *Applied Ecology* **49**, 833–841 (2012).
- 763 108. Tryon, C. A. & Snyder, D. P. Biology of the eastern chipmunk, *Tamias striatus*: Life  
764 tables, age distributions, and trends in population numbers. *Journal of Mammalogy* **54**,  
765 145–168 (1973).

- 766 109. McAdam, A. G., Boutin, S., Sykes, A. K. & Humphries, M. M. Life histories of female  
767 red squirrels and their contributions to population growth and lifetime fitness .  
768 *Ecoscience* **14**, 362–369 (2007).
- 769 110. Arnold, J. M., Brault, S. & Croxall, J. P. Albatross populations in peril: A population  
770 trajectory for Black-Browed Albatrosses at South Georgia. *Ecological Applications* **16**,  
771 419–432 (2006).
- 772 111. Rolland, V., Nevoux, M., Barbraud, C. & Weimerskirch, H. Respective impact of  
773 climate and fisheries on the growth of an albatross population. *Ecological Applications*  
774 **19**, 1336–1346 (2009).
- 775 112. Noda, T. & Nakao, S. Dynamics of an entire population of the subtidal snail  
776 *Umbonium costatum*: The importance of annual recruitment fluctuation. *Journal of*  
777 *Animal Ecology* **65**, 196 (1996).
- 778 113. Oli, M. K., Slade, N. A. & Dobson, F. S. Effect of density reduction on unita ground  
779 squirrels: Analysis of life table response experiments. *Ecology* **82**, 1921–1929 (2001).
- 780 114. Sherman, P. W. & Morton, M. L. Demography of Belding’s Ground Squirrels.  
781 *Ecology* **65**, 1617–1628 (1984).
- 782 115. Hudgens, B. R. & Garcelon, D. K. Induced changes in island fox (*Urocyon littoralis*)  
783 activity do not mitigate the extinction threat posed by a novel predator. *Oecologia* **165**,  
784 699–705 (2011).
- 785 116. Hebblewhite, M., Percy, M. & Serrouya, R. Black bear (*Ursus americanus*) survival  
786 and demography in the Bow Valley of Banff National Park, Alberta. *Biological*  
787 *Conservation* **112**, 415–425 (2003).

- 788 117. Lewis, D. L., Breck, S. W., Wilson, K. R. & Webb, C. T. Modeling black bear  
789 population dynamics in a human-dominated stochastic environment. *Ecological*  
790 *Modelling* **294**, 51–58 (2014).
- 791 118. Mitchell, M. S., Pacifici, L. B., Grand, J. B. & Powell, R. A. Contributions of vital  
792 rates to growth of a protected population of American black bears. *Ursus* **20**, 77–84  
793 (2009).
- 794 119. Wielgus, R. B. Minimum viable population and reserve sizes for naturally regulated  
795 grizzly bears in British Columbia. *Biological Conservation* **106**, 381–388 (2002).
- 796 120. Hunter, C. M. *et al.* Climate change threatens polar bear populations: a stochastic  
797 demographic analysis. *Ecology* **91**, 2883–2897 (2010).
- 798 121. Altwegg, R., Dummermuth, S., Anholt, B. R., Flatt, T. & Benton, T. Winter weather  
799 affects Asp Viper *Vipera aspis* population dynamics through susceptible juveniles.  
800 *Oikos* **110**, 55–66 (2005).
- 801 122. Zúñiga-Vega, J., Valverde, T., Rojas-González, I. & Lemos-Espinal, J. A. Analysis of  
802 the population dynamics of an endangered lizard (*Xenosaurus grandis*) through the use  
803 of projection matrices. *Copeia* **2007**, 324–335 (2007).
- 804 123. Jones, C., Rojas-González, I., Lemos-Espinal, J. & Zúñiga-Vega, J. Demography of  
805 *Xenosaurus platyceps* (Squamata: Xenosauridae): a comparison between tropical and  
806 temperate populations. *Amphibia-Reptilia* **29**, 245–256 (2008).
- 807 124. McMurray, S. E., Henkel, T. P. & Pawlik, J. R. Demographics of increasing  
808 populations of the giant barrel sponge *Xestospongia muta* in the Florida Keys. *Ecology*  
809 **91**, 560–570 (2010).

- 810 125. Wielgus, J., Gonzalez-Suarez, M., Aurioles-Gamboa, D. & Gerber, L. R. A  
811 noninvasive demographic assessment of sea lions based on stage-specific abundances.  
812 *Ecological Applications* **18**, 1287–1296 (2008).
- 813 126. Bergek, S., Ma, Q., Vetemaa, M., Franzén, F. & Appelberg, M. From individuals to  
814 populations: Impacts of environmental pollution on natural eelpout populations.  
815 *Ecotoxicology and Environmental Safety* **79**, 1–12 (2012).
- 816 127. Mugabo, M., Perret, S., Legendre, S. & le Galliard, J. F. Density-dependent life history  
817 and the dynamics of small populations. *Journal of Animal Ecology* **82**, 1227–1239  
818 (2013).
- 819 128. Silvertown, J. & Dodd, M. The demographic cost of reproduction and its consequences  
820 in Balsam Fir (*Abies balsamea*). *The American Naturalist* **154**, 321–332 (1999).
- 821 129. van Mantgem, P. J. & Stephenson, N. L. The accuracy of matrix population model  
822 projections for coniferous trees in the Sierra Nevada, California. *Journal of Ecology*  
823 **93**, 737–747 (2005).
- 824 130. Nakashizuka, T. Population dynamics of coniferous and broad-leaved trees in a  
825 Japanese temperate mixed forest. *Journal of Vegetation Science* **2**, 413–418 (1991).
- 826 131. Hiura, T. & Fujiwara, K. Density-dependence and co-existence of conifer and broad-  
827 leaved trees in a Japanese northern mixed forest. *Journal of Vegetation Science* **10**,  
828 843–850 (1999).
- 829 132. Kubota, Y. Demographic traits of understory trees and population dynamics of a Picea-  
830 *Abies* forest in Taisetsuzan National Park, northern Japan. *Ecological Research* **12**, 1–  
831 9 (1997).

- 832 133. Grice, A. C., Westoby, M. & Torpy, C. Dynamics and population structure of *Acacia*  
833 *victoriae* Benth. *Australian Journal of Ecology* **19**, 10–16 (1994).
- 834 134. Tanaka, H. *et al.* Comparative demography of three coexisting *Acer* species in gaps  
835 and under closed canopy. *Journal of Vegetation Science* **19**, 127–138 (2008).
- 836 135. Lin, Y. & Augspurger, C. K. Impact of spatial heterogeneity of neighborhoods on  
837 long-term population dynamics of sugar maple (*Acer saccharum*). *Forest Ecology and*  
838 *Management* **255**, 3589–3596 (2008).
- 839 136. Guàrdia, R., Raventós, J. & Caswell, H. Spatial growth and population dynamics of a  
840 perennial tussock grass (*Achnatherum calamagrostis*) in a badland area. *Journal of*  
841 *Ecology* **88**, 950–963 (2000).
- 842 137. Cook, R. A. The population biology and demography of *Cimicifuga rubifolia* Kearney  
843 and the genetic relationships among North American *Cimicifuga* Species. (University  
844 of Tennessee, Knoxville, 1993).
- 845 138. Kaye, T. N. & Pyke, D. A. The effect of stochastic technique on estimates of  
846 population viability from transition matrix models. *Ecology* **84**, 1464–1476 (2003).
- 847 139. Mayberry, R. J. & Elle, E. Conservation of a rare plant requires different methods in  
848 different habitats: Demographic lessons from *Actaea elata*. *Oecologia* **164**, 1121–1130  
849 (2010).
- 850 140. Fröborg, H. & Eriksson, O. Predispersal seed predation and population dynamics in the  
851 perennial understorey herb *Actaea spicata*. *Canadian Journal of Botany* **81**, 1058–  
852 1069 (2003).



- 853 141. Iriondo, J. M., Albert, M. J., Giménez Benavides, L., Domínguez Lozano, F. &  
854 Escudero, A. *Populations in peril: Demographic viability of threatened spanish*  
855 *vascular flora*. (Dirección General de Medio Natural y Política Forestal , 2009).
- 856 142. Kaneko, Y., Takada, T. & Kawano, S. Population biology of *Aesculus turbinata*  
857 *Blume*: A demographic analysis using transition matrices on a natural population along  
858 a riparian environmental gradient. *Plant Species Biology* **14**, 47–68 (1999).
- 859 143. Jiménez-Valdés, M., Godínez-Alvarez, H., Caballero, J. & Lira, R. Population  
860 dynamics of *Agave marmorata* Roezl. under two contrasting management systems in  
861 Central Mexico. *Economic Botany* **64**, 149–160 (2010).
- 862 144. Torres, I., Casas, A., Vega, E., Martínez-Ramos, M. & Delgado-Lemus, A. Population  
863 dynamics and sustainable management of Mescal Agaves in Central Mexico: *Agave*  
864 *potatorum* in the Tehuacán-Cuicatlán Valley. *Economic Botany* **69**, 26–41 (2015).
- 865 145. Arias-Medellín, L. A., Bonfil, C. & Valverde, T. Demographic analysis of *Agave*  
866 *angustifolia* (Agavaceae) with an emphasis on ecological restoration. *Botanical*  
867 *Sciences* **94**, 513–530 (2016).
- 868 146. Kiviniemi, K. Population dynamics of *Agrimonia eupatoria* and *Geum rivale*, two  
869 perennial grassland species. *Plant Ecology* **159**, 153–169 (2002).
- 870 147. Hansen, M. J. & Wilson, S. D. Is management of an invasive grass *Agropyron*  
871 *cristatum* contingent on environmental variation? *Journal of Applied Ecology* **43**, 269–  
872 280 (2006).
- 873 148. Bullock, J. M. *et al.* Modelling spread of British wind-dispersed plants under future  
874 wind speeds in a changing climate. *Journal of Ecology* **100**, 104–115 (2012).

- 875 149. Burns, J. H. *et al.* Greater sexual reproduction contributes to differences in  
876 demography of invasive plants and their noninvasive relatives. *Ecology* **94**, 995–1004  
877 (2013).
- 878 150. Evans, J. A. *et al.* The importance of space, time, and stochasticity to the demography  
879 and management of *Alliaria petiolata*. *Ecological Applications* **22**, 1497–1511 (2012).
- 880 151. Levin, S. C., Crandall, R. M. & Knight, T. M. Population projection models for 14  
881 alien plant species in the presence and absence of aboveground competition. *Ecology*  
882 e02681 (2019) doi:10.1002/ecy.2681.
- 883 152. Kawano, S., Takada, T., Nakayama, S. & Hiratsuka, A. Demographic differentiation  
884 and life-history evolution in temperate woodland plants. in *Differentiation Patterns in*  
885 *Higher Plants* (ed. Urbanska, K. M.) 153–181 (Academic Press, Harcourt Brace  
886 Jovanovich Publishers, 1987).
- 887 153. Ott, J. P. & Hartnett, D. C. Vegetative reproduction and bud bank dynamics of the  
888 perennial grass *Andropogon gerardii* in mixedgrass and tallgrass prairie. *The American*  
889 *Midland Naturalist* **174**, 14–32 (2015).
- 890 154. Williams, J. L. & Crone, E. E. The impact of invasive grasses on the population  
891 growth of *Anemone patens*, a long-lived native forb. *Ecology* **87**, 3200–3208 (2006).
- 892 155. Černá, L. & Münzbergová, Z. Comparative population dynamics of two closely related  
893 species differing in ploidy level. *PLoS ONE* **8**, 1–15 (2013).
- 894 156. Davison, R. *et al.* Demographic effects of extreme weather events on a short-lived  
895 calcareous grassland species: Stochastic life table response experiments. *Journal of*  
896 *Ecology* **98**, 255–267 (2010).

- 897 157. Marcante, S., Winkler, E. & Erschbamer, B. Population dynamics along a primary  
898 succession gradient: Do alpine species fit into demographic succession theory? *Annals*  
899 *of Botany* **103**, 1129–1143 (2009).
- 900 158. Zhang, L., Brockelman, W. Y. & Allen, M. A. Matrix analysis to evaluate  
901 sustainability: The tropical tree *Aquilaria crassna*, a heavily poached source of  
902 agarwood. *Biological Conservation* **141**, 1676–1686 (2008).
- 903 159. Stubben, C. J. Projecting the response of yellow columbine populations to climate  
904 change. (New Mexico State University, New Mexico, 2007).
- 905 160. Stubben, C. & Milligan, B. Estimating and analyzing demographic models using the  
906 popbio package in R. *Journal of Statistical Software* **22**, 1–23 (2007).
- 907 161. Enright, N. J. Does *Araucaria hunsteinii* compete with its neighbours? *Australian*  
908 *Journal of Ecology* **7**, 97–99 (1982).
- 909 162. Enright, N. J., Miller, B. P., Perry, G. L. W., Goldblum, D. & Jaffré, T. Stress-tolerator  
910 leaf traits determine population dynamics in the endangered New Caledonian conifer  
911 *Araucaria muelleri*. *Austral Ecology* **39**, 60–71 (2014).
- 912 163. Rautiainen, P. *et al.* Seashore disturbance and management of the clonal *Arctophila*  
913 *fulva*: Modelling patch dynamics. *Applied Vegetation Science* **7**, 221–228 (2004).
- 914 164. Kinoshita, E. Sex change and population dynamics in *Arisaema* (Araceae) I. *Arisaema*  
915 *serratum* (Thunb.) Schott. *Plant Species Biology* **2**, 15–28 (1987).
- 916 165. Bierzychudek, P. The demography of jack-in-the-pulpit, a forest perennial that  
917 “changes sex.” *Ecological Monographs* **52**, 335–351 (1982).

- 918 166. Lefebvre, C. & Chandler-Mortimer, A. Demographic characteristics of the perennial  
919 herb *Armeria maritima* on zinc lead mine wastes. *The Journal of Applied Ecology* **21**,  
920 255 (1984).
- 921 167. Jakalaniemi, A. Narrow climate and habitat envelope affect the survival of relict  
922 populations of a northern *Arnica angustifolia*. *Environmental and Experimental Botany*  
923 **72**, 415–421 (2011).
- 924 168. Bell, T. J., Bowles, M. L. & McEachern, A. K. Projecting the success of plant  
925 population restoration with viability analysis. in *Population Viability in Plants:  
926 Conservation, Management, and Modeling of Rare Plants* (eds. Brigham, C. A. &  
927 Schwartz, M. W.) 313–348 (Springer, 2003).
- 928 169. Zotz, G. & Schmidt, G. Population decline in the epiphytic orchid *Aspasia principissa*.  
929 *Biological Conservation* **129**, 82–90 (2006).
- 930 170. Bucharová, A., Münzbergová, Z. & Tájek, P. Population biology of two rare fern  
931 species: long life and long-lasting stability. *American Journal of Botany* **97**, 1260–  
932 1271 (2010).
- 933 171. Bremer, P. & Jongejans, E. Frost and forest stand effects on the population dynamics  
934 of *Asplenium scolopendrium*. *Population Ecology* **52**, 211–222 (2010).
- 935 172. Münzbergová, Z. No effect of ploidy level in plant response to competition in a  
936 common garden experiment. *Biological Journal of the Linnean Society* **92**, 211–219  
937 (2007).
- 938 173. Bernardo, H. L., Albrecht, M. A. & Knight, T. M. Increased drought frequency alters  
939 the optimal management strategy of an endangered plant. *Biological Conservation*  
940 **203**, 243–251 (2016).

- 941 174. Maschinski, J., Frye, R. & Rutman, S. Demography and population viability of an  
942 endangered plant species before and after protection from trampling. *Conservation*  
943 *Biology* **11**, 990–999 (1997).
- 944 175. Wall, W. A., Hoffmann, W. A., Wentworth, T. R., Gray, J. B. & Hohmann, M. G.  
945 Demographic effects of fire on two endemic plant species in the longleaf pine-  
946 wiregrass ecosystem. *Plant Ecology* **213**, 1093–1104 (2012).
- 947 176. Crone, E. E. & Lesica, P. Causes of synchronous flowering in *Astragalus scaphoides*,  
948 an iteroparous perennial plant. *Ecology* **85**, 1944–1954 (2004).
- 949 177. Tenhumberg, B., Crone, E. E., Ramula, S. & Tyre, A. J. Time-lagged effects of  
950 weather on plant demography: Drought and *Astragalus scaphoides*. *Ecology* **99**, 915–  
951 925 (2018).
- 952 178. Pinero, D., Martinez-Ramos, M. & Sarukhan, J. A population model of *Astrocaryum*  
953 *mexicanum* and a sensitivity analysis of its finite rate of increase. *The Journal of*  
954 *Ecology* **72**, 977 (1984).
- 955 179. Martínez-Ávalos, J. G., Golubov, J., Mandujano, m. c. & Jurado, E. Causes of  
956 individual mortality in the endangered star cactus *Astrophytum asterias* (Cactaceae):  
957 The effect of herbivores and disease in Mexican populations. *Journal of Arid*  
958 *Environments* **71**, 250–258 (2007).
- 959 180. Mandujano, M. C., Bravo, Y., Verhulst, J., Carrillo-Angeles, I. & Golubov, J. The  
960 population dynamics of an endemic collectible cactus. *Acta Oecologica* **63**, 1–7  
961 (2015).

- 962 181. Zepeda-Martínez, V., Mandujano, M. C., Mandujano, F. J. & Golubov, J. K. What can  
963 the demography of *Astrophytum ornatum* tell us of its endangered status? *Journal of*  
964 *Arid Environments* **88**, 244–249 (2013).
- 965 182. Verhulst, J., Montaña, C., Mandujano, M. C. & Franco, M. Demographic mechanisms  
966 in the coexistence of two closely related perennials in a fluctuating environment.  
967 *Oecologia* **156**, 95–105 (2008).
- 968 183. López-Hoffman, L., Ackerly, D. D., Anten, N. P. R., Denoyer, J. L. & Martinez-  
969 Ramos, M. Gap-dependence in mangrove life-history strategies: A consideration of the  
970 entire life cycle and patch dynamics. *Journal of Ecology* **95**, 1222–1233 (2007).
- 971 184. Crone, E. E., Marler, M. & Pearson, D. E. Non-target effects of broadleaf herbicide on  
972 a native perennial forb: A demographic framework for assessing and minimizing  
973 impacts. *Journal of Applied Ecology* **46**, 673–682 (2009).
- 974 185. Bradstock, R. A. & O’Connell, M. A. Demography of woody plants in relation to fire:  
975 *Banksia ericifolia* L.f. and *Petrophile pulchella* (Schrad) R.Br. *Australian Journal of*  
976 *Ecology* **13**, 505–518 (1988).
- 977 186. Zuidema, P. A. & Boot, R. G. A. Demography of the Brazil nut tree (*Bertholletia*  
978 *excelsa*) in the Bolivian Amazon: impact of seed extraction on recruitment and  
979 population dynamics. *Journal of Tropical Ecology* **18**, 1–31 (2002).
- 980 187. Lehtilä, K., Tuomi, J. & Sulkinoja, M. Bud demography of the mountain birch *Betula*  
981 *pubescens* ssp. *tortuosa* near tree line. *Ecology* **75**, 945–955 (1994).
- 982 188. Lesica, P. & Shelly, J. S. Effects of reproductive mode on demography and life history  
983 in *Arabis fecunda* (Brassicaceae). *American Journal of Botany* **82**, 752–762 (1995).

- 984 189. Bastien Barot, S. É., Gignoux, J., Vuattoux, R. & Legendre, S. P. Demography of a  
985 savanna palm tree in Ivory Coast (Lamto): population persistence and life-history.  
986 *Journal of Tropical Ecology* **16**, 637–655 (2000).
- 987 190. O’connor, T. G. The influence of rainfall and grazing on the demography of some  
988 African savanna grasses: A matrix modelling approach. *Journal of Applied Ecology*  
989 **30**, 119–132 (1993).
- 990 191. Fowler, N. L., Overath, R. D. & Pease, C. M. Detection of density dependence requires  
991 density manipulations and calculation of  $\lambda$ . *Ecology* **87**, 655–664 (2006).
- 992 192. Noël, F. *et al.* Interaction of climate, demography and genetics: A ten-year study of  
993 *Brassica insularis*, a narrow endemic Mediterranean species. *Conservation Genetics*  
994 **11**, 509–526 (2010).
- 995 193. Peters, C. M. Plant demography and the management of tropical forest resources: a  
996 case study of *Brosimum alicastrum* in Mexico. in *Rainforest Regeneration and*  
997 *Management* (eds. Gomez-Pompa, A., Whitmore, T. C. & Hadley, M.) 265–272  
998 (UNESCO, 1991).
- 999 194. Hernández-Apolinar, M., Valverde, T. & Purata, S. Demography of *Bursera*  
1000 *glabrifolia*, a tropical tree used for folk woodcrafting in Southern Mexico: An  
1001 evaluation of its management plan. *Forest Ecology and Management* **223**, 139–151  
1002 (2006).
- 1003 195. Logofet, D. O., Ulanova, N. G., Klochkova, I. N. & Demidova, A. N. Structure and  
1004 dynamics of a clonal plant population: Classical model results in a non-classic  
1005 formulation. *Ecological Modelling* **192**, 95–106 (2006).

- 1006 196. Binh, B. M. Rattans of Vietnam: Ecology, demography and harvesting. (Utrecht  
1007 University, 2009).
- 1008 197. Fiedler, P. L. Life history and population dynamics of rare and common Mariposa  
1009 Lilies (*Calochortus purshii*: Liliaceae). *Journal of Ecology* **75**, 977–995 (1987).
- 1010 198. Miller, M. T., Antos, J. A. & Allen, G. A. Demographic differences between two  
1011 sympatric lilies (*Calochortus*) with contrasting distributions, as revealed by matrix  
1012 analysis. *Plant Ecology* **191**, 265–278 (2007).
- 1013 199. Shimatani, I. K., Kubota, Y., Araki, K., Aikawa, S. I. & Manabe, T. Matrix models  
1014 using fine size classes and their application to the population dynamics of tree species:  
1015 Bayesian non-parametric estimation. *Plant Species Biology* **22**, 175–190 (2007).
- 1016 200. Jongejans, E., Sheppard, A. W. & Shea, K. What controls the population dynamics of  
1017 the invasive thistle *Carduus nutans* in its native range? *Journal of Applied Ecology* **43**,  
1018 877–886 (2006).
- 1019 201. Carlsson, B. Å. & Callaghan, T. v. Simulation of fluctuating populations of *Carex*  
1020 *bigelowii* tillers classified by type, age and size. *Oikos* **60**, 231 (1991).
- 1021 202. Wikberg, S. & Svensson, B. M. Ramet dynamics in a centrifugally expanding clonal  
1022 sedge: A matrix analysis. *Plant Ecology* **183**, 55–63 (2006).
- 1023 203. Steenbergh, W. F. & Lowe, C. H. Critical factors during the first years of life of the  
1024 Saguaro (*Cereus giganteus*) at Saguaro National Monument, Arizona. *Ecology* **50**,  
1025 825–834 (1969).
- 1026 204. Davelos, A. L. & Jarosz, A. M. Demography of American chestnut populations: effects  
1027 of a pathogen and a hyperparasite. *Journal of Ecology* **92**, 675–685 (2004).



- 1028 205. del Castillo, R. F., Trujillo-Argueta, S., Rivera-García, R., Gómez-Ocampo, Z. &  
1029 Mondragón-Chaparro, D. Possible combined effects of climate change, deforestation,  
1030 and harvesting on the epiphyte *Catopsis compacta*: a multidisciplinary approach.  
1031 *Ecology and Evolution* **3**, 3935–3946 (2013).
- 1032 206. Winkler, M., Hülber, K. & Hietz, P. Population dynamics of epiphytic bromeliads:  
1033 Life strategies and the role of host branches. *Basic and Applied Ecology* **8**, 183–196  
1034 (2007).
- 1035 207. Alvarez-Buylla, E. R. Density dependence and patch dynamics in tropical rain forests:  
1036 Matrix models and applications to a tree species. *American Naturalist* **143**, 155–191  
1037 (1994).
- 1038 208. Zuidema, P. A., Brienen, R. J. W., During, H. J. & Güneralp, B. Do persistently fast-  
1039 growing juveniles contribute disproportionately to population growth? A new analysis  
1040 tool for matrix models and Its application to rainforest trees. *The American Naturalist*  
1041 **174**, 709–719 (2009).
- 1042 209. Pisanu, S., Farris, E., Filigheddu, R. & García, M. B. Demographic effects of large,  
1043 introduced herbivores on a long-lived endemic plant. *Plant Ecology* **213**, 1543–1553  
1044 (2012).
- 1045 210. Jongejans, E. & de Kroon, H. Space versus time variation in the population dynamics  
1046 of three co-occurring perennial herbs. *Journal of Ecology* **93**, 681–692 (2005).
- 1047 211. Liu, H., Menges, E. S. & Quintana-Ascencio, P. F. Population viability analyses of  
1048 *Chamaecrista keyensis*: Effects of fire season and frequency. *Ecological Applications*  
1049 **15**, 210–221 (2005).

- 1050 212. Ash, J. D., Gorchov, D. L. & Endress, B. A. Rapid assessment of sustainable  
1051 harvesting of leaves from the understory palm, *Chamaedorea radicalis*. *The*  
1052 *Southwestern Naturalist* **58**, 70–80 (2013).
- 1053 213. Forbis, T. A. & Doak, D. F. Seedling establishment and life history trade-offs in alpine  
1054 plants. *American Journal of Botany* **91**, 1147–1153 (2004).
- 1055 214. Steege, H. ter *et al.* Basic and applied research for sound rain forest management in  
1056 Guyana. *Ecological Applications* **5**, 904–910 (1995).
- 1057 215. Munzbergova, Z. Determinants of species rarity: Population growth rates of species  
1058 sharing the same habitat. *American Journal of Botany* **92**, 1987–1994 (2005).
- 1059 216. Jongejans, E., de Vere, N. & de Kroon, H. Demographic vulnerability of the clonal and  
1060 endangered meadow thistle. *Plant Ecology* **198**, 225–240 (2008).
- 1061 217. Ramula, S. Population dynamics of a monocarpic thistle: simulated effects of  
1062 reproductive timing and grazing of flowering plants. *Acta Oecologica* **33**, 231–239  
1063 (2008).
- 1064 218. Dodge, G. J. Ecological effects of the biocontrol insects, *Larinus planus* and  
1065 *Rhinocyllus conicus*, on native thistles. (University of Maryland, 2005).
- 1066 219. Halsey, S. J., Bell, T. J., McEachern, K. & Pavlovic, N. B. Population-specific life  
1067 histories contribute to metapopulation viability. *Ecosphere* **7**, (2016).
- 1068 220. Jolls, C. L., Marik, J. E., Hamz , S. I. & Havens, K. Population viability analysis and  
1069 the effects of light availability and litter on populations of *Cirsium pitcheri*, a rare,  
1070 monocarpic perennial of Great Lakes shorelines. *Biological Conservation* **187**, 82–90  
1071 (2015).

- 1072 221. Forcella, F. & Wood, H. Demography and control of *Cirsium vulgare* (Savi) Ten. in  
1073 relation to grazing. *Weed Research* **26**, 199–206 (1986).
- 1074 222. Eckberg, J. O., Tenhumberg, B. & Louda, S. M. Native insect herbivory limits  
1075 population growth rate of a non-native thistle. *Oecologia* **175**, 129–138 (2014).
- 1076 223. Bullock, J. M., Hill, B. C. & Silvertown, J. Demography of *cirsium vulgare* in a  
1077 grazing experiment. *Journal of Ecology* **82**, 101 (1994).
- 1078 224. Wells, T. C. E. & Willems, J. H. *Population ecology of terrestrial orchids*. (SPB  
1079 Academic Publishing, 1991).
- 1080 225. DeWalt, S. J. Population dynamics and potential for biological control of an exotic  
1081 invasive shrub in Hawaiian rainforests. *Biological Invasions* **8**, 1145–1158 (2006).
- 1082 226. Olmsted, I. & Alvarez-Buylla, E. R. Sustainable harvesting of tropical trees:  
1083 Demography and matrix models of two palm species in Mexico. *Ecological*  
1084 *Applications* **5**, 484–500 (1995).
- 1085 227. Silva, J. F., Cristina Trevisan, M., Estrada, C. A. & Monasterio, M. Comparative  
1086 demography of two giant caulescent rosettes (*Espeletia timotensis* and *E. spicata*) from  
1087 the high tropical Andes. *Global Ecology & Biogeography* **9**, 403–413 (2000).
- 1088 228. Bladow, J. M., Bohner, T. & Winn, A. A. Comparisons of demography and inbreeding  
1089 depression in introduced and wild populations of an endangered shrub. *Natural Areas*  
1090 *Journal* **37**, 294–308 (2017).
- 1091 229. Prendeville, H. R., Tenhumberg, B. & Pilson, D. Effects of virus on plant fecundity  
1092 and population dynamics. *New Phytologist* **202**, 1346–1356 (2014).

- 1093 230. Boorman, L. A. & Fuller, R. M. The comparative ecology of two sand dune biennials:  
1094 *Lactuca virosa* L. and *Cynoglossum officinale* L. *The New Phytologist* **69**, 609–629  
1095 (1984).
- 1096 231. García, M. B., Goñi, D. & Guzmán, D. Living at the edge: Local versus positional  
1097 factors in the long-term population dynamics of an endangered orchid. *Conservation*  
1098 *Biology* **24**, 1219–1229 (2010).
- 1099 232. Zhongjian, L., Lijun, C., Wenhui, R., Liqiang, L. & Yuting, Z. Correlation between  
1100 numerical dynamics and reproductive behavior in *Cypripedium lentiginosum*. *Acta*  
1101 *Ecologica Sinica* **28**, 111–121 (2008).
- 1102 233. Bialic-Murphy, L., Gaoue, O. G. & Kawelo, K. Microhabitat heterogeneity and a non-  
1103 native avian frugivore drive the population dynamics of an island endemic shrub,  
1104 *Cyrtandra dentata*. *Journal of Applied Ecology* **54**, 1469–1477 (2017).
- 1105 234. Neubert, M. G. & Parker, I. M. Projecting rates of spread for invasive species. *Risk*  
1106 *Analysis* **24**, 817–831 (2004).
- 1107 235. Sletvold, N. & Ågren, J. Nonlinear costs of reproduction in a long-lived plant. *Journal*  
1108 *of Ecology* **103**, 1205–1213 (2015).
- 1109 236. Sletvold, N., Øien, D. I. & Moen, A. Long-term influence of mowing on population  
1110 dynamics in the rare orchid *Dactylorhiza lapponica*: The importance of recruitment  
1111 and seed production. *Biological Conservation* **143**, 747–755 (2010).
- 1112 237. Moloney, K. A. Fine-scale spatial and temporal variation in the demography of a  
1113 perennial bunchgrass. *Ecology* **69**, 1588–1598 (1988).

- 1114 238. Rodríguez-Pérez, J. & Traveset, A. Demographic consequences for a threatened plant  
1115 after the loss of its only disperser. Habitat suitability buffers limited seed dispersal.  
1116 *Oikos* **121**, 835–847 (2012).
- 1117 239. Lin, C. H., Miriti, M. N. & Goodell, K. Demographic consequences of greater clonal  
1118 than sexual reproduction in *Dicentra canadensis*. *Ecology and Evolution* **6**, 3871–3883  
1119 (2016).
- 1120 240. Menges, E. S., Quintana Ascencio, P. F., Weekley, C. W. & Gaoue, O. G. Population  
1121 viability analysis and fire return intervals for an endemic Florida scrub mint.  
1122 *Biological Conservation* **127**, 115–127 (2006).
- 1123 241. Picard, N., Ouédraogo, D. & Bar-Hen, A. Choosing classes for size projection matrix  
1124 models. *Ecological Modelling* **221**, 2270–2279 (2010).
- 1125 242. Cabrera-Toledo, D., González-Astorga, J., Nicolalde-Morejón, F., Vergara-Silva, F. &  
1126 Vovides, A. P. Allozyme diversity levels in two congeneric *Dioon* spp. (Zamiaceae,  
1127 Cycadales) with contrasting rarities. *Plant Systematics and Evolution* **290**, 115–125  
1128 (2010).
- 1129 243. Octavio-Aguilar, P., González-Astorga, J. & Vovides, A. P. Population dynamics of the  
1130 Mexican cycad *Dioon edule* Lindl. (Zamiaceae): Life history stages and management  
1131 impact. *Botanical Journal of the Linnean Society* **157**, 381–391 (2008).
- 1132 244. Lázaro-Zermeño, J. M., González-Espinosa, M., Mendoza, A., Martínez-Ramos, M. &  
1133 Quintana-Ascencio, P. F. Individual growth, reproduction and population dynamics of  
1134 *Dioon merolae* (Zamiaceae) under different leaf harvest histories in Central Chiapas,  
1135 Mexico. *Forest Ecology and Management* **261**, 427–439 (2011).

- 1136 245. Álvarez-Yépiz, J. C., Dovčiak, M. & Búrquez, A. Persistence of a rare ancient cycad:  
1137 Effects of environment and demography. *Biological Conservation* **144**, 122–130  
1138 (2011).
- 1139 246. García, M. B. Demographic viability of a relict population of the critically endangered  
1140 plant *Borderea chouardii*. *Conservation Biology* **17**, 1672–1680 (2003).
- 1141 247. Werner, P. A. & Caswell, H. Population growth rates and age versus stage-distribution  
1142 models for teasel (*Dipsacus sylvestris* Huds.). *Ecology* **58**, 1103–1111 (1977).
- 1143 248. Dostálek, T. & Münzbergová, Z. Comparative population biology of critically  
1144 endangered *Dracocephalum austriacum* (Lamiaceae) in two distant regions. *Folia*  
1145 *Geobotanica* **48**, 75–93 (2013).
- 1146 249. Martorell, C. Detecting and managing an overgrazing-drought synergism in the  
1147 threatened *Echeveria longissima* (Crassulaceae): The role of retrospective  
1148 demographic analysis. *Population Ecology* **49**, 115–125 (2007).
- 1149 250. Hurlburt, D. P. Population ecology and economic botany of *Echinacea angustifolia*, a  
1150 native prairie medicinal plant. (Department of Ecology and Evolutionary Biology,  
1151 University of Kansas, 1999).
- 1152 251. Dykstra, A. B. Seedling recruitment in fragmented populations of *Echinacea*  
1153 *angustifolia*. (University of Minnesota, 2013).
- 1154 252. Jiménez-Sierra, C., Mandujano, M. C. & Eguiarte, L. E. Are populations of the candy  
1155 barrel cactus (*Echinocactus platyacanthus*) in the desert of Tehuacán, Mexico at risk?  
1156 Population projection matrix and life table response analysis. *Biological Conservation*  
1157 **135**, 278–292 (2007).

- 1158 253. Raimondo, D. C. & Donaldson, J. S. Responses of cycads with different life histories  
1159 to the impact of plant collecting: simulation models to determine important life history  
1160 stages and population recovery times. *Biological Conservation* **111**, 345–358 (2003).
- 1161 254. Picard, N., Yalibanda, Y., Namkossereana, S. & Baya, F. Estimating the stock recovery  
1162 rate using matrix models. *Forest Ecology and Management* **255**, 3597–3605 (2008).
- 1163 255. Chagneau, P., Mortier, F. & Picard, N. Designing permanent sample plots by using a  
1164 spatially hierarchical matrix population model. *Journal of the Royal Statistical Society*  
1165 *C: Applied Statistics* **58**, 345–367 (2009).
- 1166 256. Doak, D. F. Lifetime impacts of herbivory for a perennial plant. *Ecology* **73**, 2086–  
1167 2099 (1992).
- 1168 257. Hens, H., Pakanen, V. M., Jäkäläniemi, A., Tuomi, J. & Kvist, L. Low population  
1169 viability in small endangered orchid populations: Genetic variation, seedling  
1170 recruitment and stochasticity. *Biological Conservation* **210**, 174–183 (2017).
- 1171 258. Watson, I. W., Westoby, M. & Holm, A. McR. Continuous and episodic components  
1172 of demographic change in arid zone shrubs: Models of two eremophila species from  
1173 Western Australia compared with published data on other species. *Journal of Ecology*  
1174 **85**, 833 (1997).
- 1175 259. Satterthwaite, W. H., Menges, E. S. & Quintana-Ascencio, P. F. Assessing scrub  
1176 buckwheat population viability in relation to fire using multiple modelling techniques.  
1177 *Ecological Applications* **12**, 1672–1687 (2002).
- 1178 260. Logofet, D. O., Kazantseva, E. S., Belova, I. N. & Onipchenko, V. G. Local population  
1179 of *Eritrichium caucasicum* as an object of mathematical modelling. II. How short does  
1180 the short-lived perennial live? *Biology Bulletin Reviews* **8**, 193–202 (2018).

- 1181 261. Andrello, M. *et al.* Effects of management regimes and extreme climatic events on  
1182 plant population viability in *Eryngium alpinum*. *Biological Conservation* **147**, 99–106  
1183 (2012).
- 1184 262. Menges, E. S. & Quintana, P. F. Population viability with fire in *Eryngium*  
1185 *cunefolium*: Deciphering a decade of demographic data. *Ecological Monographs* **74**,  
1186 79–99 (2004).
- 1187 263. Curle, C. M., Stabbetorp, O. E. & Nordal, I. *Eryngium maritimum*, biology of a plant  
1188 at its northernmost localities. *Nordic Journal of Botany* **24**, 617–628 (2006).
- 1189 264. Angert, A. L. Demography of central and marginal populations of monkeyflowers  
1190 (*Mimulus cardinalis* and *M. lewisii*). *Ecology* **87**, 2014–2025 (2006).
- 1191 265. Takada, T., Nakayama, S. & Kawano, S. A sensitivity analysis of the population  
1192 dynamics of *Erythronium japonicum*, a liliaceous perennial. *Plant Species Biology* **13**,  
1193 117–127 (1998).
- 1194 266. Schmalzel, R. J., Reichenbacher, F. W. & Rutman, S. Demographic study of the rare  
1195 *Coryphantha robbinsorum* (Cactaceae) in southeastern Arizona. *Madroño* **42**, 332–348  
1196 (1995).
- 1197 267. Byers, D. L. & Meagher, T. R. A comparison of demographic characteristics in a rare  
1198 and a common species of eupatorium. *Ecological Applications* **7**, 519–530 (1997).
- 1199 268. Matos, D. M. S., Freckleton, R. P. & Watkinson, A. R. The role of density dependence  
1200 in the population dynamics of a tropical palm. *Ecology* **80**, 2635–2650 (1999).
- 1201 269. Otárola, M. F. & Avalos, G. Demographic variation across successional stages and  
1202 their effects on the population dynamics of the neotropical palm *Euterpe precatoria*.  
1203 *American Journal of Botany* **101**, 1023–1028 (2014).



- 1204 270. Batista, W. B., Platt, W. J. & Macchiavelli, R. E. Demography of a shade-tolerant tree  
1205 (Fagus grandifolia) in a hurricane-disturbed forest. *Ecology* **79**, 38–53 (1998).
- 1206 271. Gibert, A., Magda, D. & Hazard, L. Interplay between endophyte prevalence, effects  
1207 and transmission: Insights from a natural grass population. *PLoS ONE* **10**, 1–17  
1208 (2015).
- 1209 272. Che-Castaldo, J. P. & Inouye, D. W. The effects of dataset length and mast seeding on  
1210 the demography of *Frasera speciosa*, a long-lived monocarpic plant. *Ecosphere* **2**,  
1211 art126 (2011).
- 1212 273. Yonezawa, K., Kinoshita, E., Watano, Y. & Zentoh, H. Formulation and estimation of  
1213 the effective size of stage-structured populations in *Fritillaria camtschaticensis*, a  
1214 perennial herb with a complex life history. *Evolution (N Y)* **54**, 2007–2013 (2000).
- 1215 274. Enright, N. & Ogden, J. Applications of transition matrix models in forest dynamics:  
1216 *Araucaria* in Papua New Guinea and *Nothofagus* in New Zealand. *Austral Ecology* **4**,  
1217 3–23 (1979).
- 1218 275. Osunkoya, O. O. Two-sex population projection of the endemic and dioecious  
1219 rainforest shrub, *Gardenia actinocarpa* (Rubiaceae). *Biological Conservation* **114**, 39–  
1220 51 (2003).
- 1221 276. Gerard, J., Oostermeijer, B., Brugman, M. L., de Boer, E. R. & den Nijs, H. C. M.  
1222 Temporal and spatial variation in the demography of *Gentiana pneumonanthe*, a rare  
1223 perennial herb. *Journal of Ecology* **84**, 153–166 (1996).
- 1224 277. Lennartsson, T., Gerard, J. & Oostermeijer, B. Demographic variation and population  
1225 viability in *Gentianella campestris*: Effects of grassland management and  
1226 environmental stochasticity. *Journal of Ecology* **89**, 451–463 (2001).

- 1227 278. Zuidema, P. A., de Kroon, H., Marinus, A. & Werger, J. A. Testing sustainability by  
1228 prospective and retrospective demographic analyses: Evaluation for palm leaf harvest.  
1229 *Ecological Applications* **17**, 118–128 (2007).
- 1230 279. Svenning, J. C. Crown illumination limits the population growth rate of a neotropical  
1231 understorey palm (*Geonoma macrostachys*, Arecaceae). *Plant Ecology* **159**, 185–199  
1232 (2002).
- 1233 280. Souza, A. F. & Martins, F. R. Demography of the clonal palm *Geonoma brevispatha* in  
1234 a Neotropical swamp forest. *Austral Ecology* **31**, 869–881 (2006).
- 1235 281. Sampaio, M. B. & Scariot, A. Effects of stochastic herbivory events on population  
1236 maintenance of an understorey palm species (*Geonoma schottiana*) in riparian tropical  
1237 forest. *Journal of Tropical Ecology* **26**, 151–161 (2010).
- 1238 282. Ramula, S., Toivonen, E. & Mutikainen, P. Demographic consequences of pollen  
1239 limitation and inbreeding depression in a gynodioecious herb. *International Journal of*  
1240 *Plant Sciences* **168**, 443–453 (2007).
- 1241 283. Wepler, T., Stoll, P. & Stöcklin, J. The relative importance of sexual and clonal  
1242 reproduction for population growth in the long-lived alpine plant *Geum reptans*.  
1243 *Journal of Ecology* **94**, 869–879 (2006).
- 1244 284. Horvitz, C. C. & Schemske, D. W. Spatiotemporal variation in demographic  
1245 transitions of a tropical understory herb: Projection matrix analysis. *Ecological*  
1246 *Monographs* **65**, 1–55 (1995).
- 1247 285. Mondragón, D. Population viability analysis for *Guarianthe aurantiaca*, an ornamental  
1248 epiphytic orchid harvested in Southeast México. *Plant Species Biology* **24**, 35–41  
1249 (2009).

- 1250 286. Loayza, A. P. & Knight, T. Seed dispersal by pulp consumers, not “legitimate” seed  
1251 dispersers, increases *Guettarda viburnoides* population growth. *Ecology* **91**, 2684–  
1252 2695 (2010).
- 1253 287. Adams, V. M., Marsh, D. M. & Knox, J. S. Importance of the seed bank for population  
1254 viability and population monitoring in a threatened wetland herb. *Biological*  
1255 *Conservation* **124**, 425–436 (2005).
- 1256 288. Marrero-Gómez, M. v., Oostermeijer, J. G. B., Carqué-Álamo, E. & Bañares-Baudet,  
1257 Á. Population viability of the narrow endemic *Helianthemum juliae* (Cistaceae) in  
1258 relation to climate variability. *Biological Conservation* **136**, 552–562 (2007).
- 1259 289. Nantel, P. & Gagnon, D. Variability in the dynamics of northern peripheral versus  
1260 southern populations of two clonal plant species, *Helianthus divaricatus* and *Rhus*  
1261 *aromatica*. *Journal of Ecology* **87**, 748–760 (1999).
- 1262 290. Bruna, E. M. Are plant populations in fragmented habitats recruitment limited? Tests  
1263 with an Amazonian herb. *Ecology* **84**, 932–947 (2003).
- 1264 291. Balcázar Vargas, M. P. From forest floor to the canopy: Life history of secondary  
1265 hemiepiphytes (*Heteropsis* species) in the Colombian Amazon. (University of Utrecht,  
1266 2013).
- 1267 292. Vega, E. & Montaña, C. Spatio-temporal variation in the demography of a bunch grass  
1268 in a patchy semiarid environment. *Plant Ecology* **175**, 107–120 (2004).
- 1269 293. Pfeifer, M., Wiegand, K., Heinrich, W. & Jetschke, G. Long-term demographic  
1270 fluctuations in an orchid species driven by weather: Implications for conservation  
1271 planning. *Journal of Applied Ecology* **43**, 313–324 (2006).

- 1272 294. Baldauf, C., Corrêa, C. E., Ferreira, R. C. & dos Santos, F. A. M. Assessing the effects  
1273 of natural and anthropogenic drivers on the demography of *Himatanthus drasticus*  
1274 (*Apocynaceae*): Implications for sustainable management. *Forest Ecology and*  
1275 *Management* **354**, 177–184 (2015).
- 1276 295. Gross, K. *et al.* Modeling controlled burning and trampling reduction for conservation  
1277 of *Hudsonia montana*. *Conservation Biology* **12**, 1291–1301 (1998).
- 1278 296. Sinclair, A. Recovery of a threatened economic plant (*Hydrastis canadensis*).  
1279 (University of Ottawa, 2002).
- 1280 297. Christensen, D. L. & Gorchov, D. L. Population dynamics of goldenseal (*Hydrastis*  
1281 *canadensis*) in the core of its historical range. *Plant Ecology* **210**, 195–211 (2010).
- 1282 298. Økland, R. H. Population biology of the clonal moss *Hylocomium splendens* in  
1283 Norwegian boreal spruce forests. III. Six-year demographic variation in two areas.  
1284 *Oikos* **22**, 49–68 (1997).
- 1285 299. Økland, R. H. Population biology of the clonal moss *Hylocomium splendens* in  
1286 Norwegian boreal spruce forests. 5. Vertical dynamics of individual shoot segments  
1287 Rune Halvorsen Økland. *Oikos* **88**, 449–469 (2000).
- 1288 300. Francisco Quintana-Ascencio, P., Menges, E. S. & Weekley, C. W. A fire-explicit  
1289 population viability analysis of *Hypericum cumulicola* in florida rosemary scrub.  
1290 *Conservation Biology* **17**, 433–449 (2003).
- 1291 301. Jongejans, E. *et al.* Region versus site variation in the population dynamics of three  
1292 short-lived perennials. *Journal of Ecology* **98**, 279–289 (2010).
- 1293 302. Pinard, M. Impacts of stem harvesting on populations of *Iriartea deltoidea* (*Palmae*) in  
1294 an extractive reserve in Acre, Brazil. *Biotropica* **25**, 2 (1993).

- 1295 303. Farah, K. O., Tanaka, A. F. & West, N. E. Autecology and population biology of dyers  
1296 woad (*Isatis tinctoria*). *Weed Sci* **36**, 186–193 (1988).
- 1297 304. Dauer, J. T., McEvoy, P. B. & van Sickle, J. Controlling a plant invader by targeted  
1298 disruption of its life cycle. *Journal of Applied Ecology* **49**, 322–330 (2012).
- 1299 305. Winkler, M., Hülber, K. & Hietz, P. Population dynamics of epiphytic orchids in a  
1300 metapopulation context. *Annals of Botany* **104**, 995–1004 (2009).
- 1301 306. Couralet, C., Sass-Klaassen, U., Sterck, F., Bekele, T. & Zuidema, P. A. Combining  
1302 dendrochronology and matrix modelling in demographic studies: An evaluation for  
1303 *Juniperus procera* in Ethiopia. *Forest Ecology and Management* **216**, 317–330 (2005).
- 1304 307. Gaoue, O. G. & Ticktin, T. Effects of harvest of nontimber forest products and  
1305 ecological differences between sites on the demography of african mahogany.  
1306 *Conservation Biology* **24**, 605–614 (2010).
- 1307 308. Johansen, L., Wehn, S. & Hovstad, K. A. Clonal growth buffers the effect of grazing  
1308 management on the population growth rate of a perennial grassland herb. *Flora* **223**,  
1309 11–18 (2016).
- 1310 309. Pino, J., Xavier Picó, F. & de Roa, E. Population dynamics of the rare plant  
1311 *Kosteletzkya pentacarpos* (Malvaceae): a nine-year study. *Botanical Journal of the*  
1312 *Linnean Society* **153**, 455–462 (2007).
- 1313 310. Osunkoya, O. O., Perrett, C., Fernando, C., Clark, C. & Raghu, S. Modeling  
1314 population growth and site specific control of the invasive *Lantana camara* L.  
1315 (Verbenaceae) under differing fire regimes. *Population Ecology* **55**, 291–303 (2013).
- 1316 311. Ehrlén, J. Demography of the perennial herb *Lathyrus vernus*. I. Herbivory and  
1317 individual performance. *Journal of Ecology* **83**, 287–295 (1995).

- 1318 312. Witt, S. M. Microhabitat distribution and demography of two Florida scrub endemic  
1319 plants with comparisons to their habitat-generalist congeners. (Louisiana State  
1320 University, 2004).
- 1321 313. Raventós, J., Segarra, J. & Acevedo, M. F. Growth dynamics of tropical savanna grass  
1322 species using projection matrices. *Ecological Modelling* **174**, 85–101 (2004).
- 1323 314. Schutzenhofer, M. R. & Knight, T. M. Population-level effects of augmented  
1324 herbivory on *Lespedeza cuneata*: Implications for biological control. *Ecological*  
1325 *Applications* **17**, 965–971 (2007).
- 1326 315. Schutzenhofer, M. R., Valone, T. J. & Knight, T. M. Herbivory and population  
1327 dynamics of invasive and native *Lespedeza*. *Oecologia* **161**, 57–66 (2009).
- 1328 316. Ellis, M. M. *et al.* Matrix population models from 20 studies of perennial plant  
1329 populations. *Ecology* **93**, 951 (2012).
- 1330 317. Heinken-Šmidová, A. & Münzbergová, Z. Population dynamics of the endangered,  
1331 long-lived perennial species, *Ligularia sibirica*. *Folia Geobotanica* **47**, 193–214  
1332 (2012).
- 1333 318. Baltzer, J. L., Reekie, E. G., Hewlin, H. L., Taylor, P. D. & Boates, J. S. Impact of  
1334 flower harvesting on the salt marsh plant *Limonium carolinianum*. *Canadian Journal*  
1335 *of Botany* **80**, 841–851 (2002).
- 1336 319. Verkaar, H. J. & Schenkeveld, A. J. On the ecology of short-lived forbs in chalk  
1337 grasslands: Life-history characteristics. *The New Phytologist* **98**, 659–672 (1984).
- 1338 320. Dangremond, E. M., Pardini, E. A. & Knight, T. M. Apparent competition with an  
1339 invasive plant hastens the extinction of an endangered lupine. *Ecology* **91**, 2261–2271  
1340 (2010).

- 1341 321. Nabe-Nielsen, J. Demography of *Machaerium cuspidatum*, a shade-tolerant  
1342 neotropical liana. *Journal of Tropical Ecology* **20**, 505–516 (2004).
- 1343 322. Sánchez-Velásquez, L. R. & del Rosario Pineda-López, M. Comparative demographic  
1344 analysis in contrasting environments of *Magnolia dealbata*: An endangered species  
1345 from Mexico. *Population Ecology* **52**, 203–210 (2010).
- 1346 323. Contreras, C. & Valverde, T. Evaluation of the conservation status of a rare cactus  
1347 (*Mammillaria crucigera*) through the analysis of its population dynamics. *Journal of*  
1348 *Arid Environments* **51**, 89–102 (2002).
- 1349 324. Flores Martínez, A. *et al.* Demography of an endangered endemic rupicolous cactus.  
1350 *Ecology* **210**, 53–66 (2010).
- 1351 325. Valverde, T., Quijas, S., López-Villavicencio, M. & Castillo, S. Population dynamics  
1352 of *Mammillaria magnimamma* Haworth. (Cactaceae) in a lava-field in central Mexico.  
1353 *Plant Ecology* **170**, 167–184 (2004).
- 1354 326. Vite González, F. & Zavala Hurtado, J. A. *Estatus ecológicos de Mammillaria*  
1355 *pectinifera* Weber y *Pachycereus fulviceps* Weber en el Valle de Zapotitlán, Puebla.  
1356 [www.conabio.gob.mx](http://www.conabio.gob.mx) (1998).
- 1357 327. Cruz-Rodríguez, J. A., López-Mata, L. & Valverde, T. A comparison of traditional  
1358 elasticity and variance-standardized perturbation analyses: A case study with the  
1359 tropical tree species *Manilkara zapota* (Sapotaceae). *Journal of Tropical Ecology* **25**,  
1360 135–146 (2009).
- 1361 328. Holm, J. A., Miller, C. J. & Cropper, W. P. Population dynamics of the dioecious  
1362 amazonian palm *Mauritia flexuosa*: Simulation analysis of sustainable harvesting.  
1363 *Biotropica* **40**, 550–558 (2008).

- 1364 329. Crowley, G., Garnett, S. & Shephard, S. Impact of storm-burning on *Melaleuca*  
1365 *viridiflora* invasion of grasslands and grassy woodlands on Cape York Peninsula,  
1366 Australia. *Austral Ecology* **34**, 196–209 (2009).
- 1367 330. Hughes, F. M., Figueira, J. E. C., Jacobi, C. M. & Borba, E. L. Demographic processes  
1368 and anthropogenic threats of lithophytic cacti in eastern Brazil. *Brazilian Journal of*  
1369 *Botany* **41**, 631–640 (2018).
- 1370 331. Hoffmann, W. A. Fire and population dynamics of woody plants in a neotropical  
1371 savanna: Matrix model projections. *Ecology* **80**, 1354–1369 (1999).
- 1372 332. Pascarella, J. B., Aide, T. M. & Zimmerman, J. K. The demography of *Miconia*  
1373 *prasina* (Melastomataceae) during secondary succession in Puerto Rico. *Biotropica* **39**,  
1374 54–61 (2007).
- 1375 333. Norghauer, J. M. & Newbery, D. M. Seed fate and seedling dynamics after masting in  
1376 two African rain forest trees. *Ecological Monographs* **81**, 443–469 (2011).
- 1377 334. Elderd, B. D. & Doak, D. F. Comparing the direct and community-mediated effects of  
1378 disturbance on plant population dynamics: flooding, herbivory and *Mimulus guttatus*.  
1379 *Journal of Ecology* **94**, 656–669 (2006).
- 1380 335. DeMarche, M. L., Kay, K. M. & Angert, A. L. The scale of local adaptation in  
1381 *Mimulus guttatus*: Comparing life history races, ecotypes, and populations. *New*  
1382 *Phytologist* **211**, 345–356 (2016).
- 1383 336. Jacquemyn, H., Brys, R. & Neubert, M. G. Fire increases invasive spread of *Molina*  
1384 *caerulea* mainly through changes in demographic parameters. *Ecological Applications*  
1385 **15**, 2097–2108 (2005).



- 1386 337. Ghimire, S. K., Gimenez, O., Pradel, R., McKey, D. & Aumeeruddy-Thomas, Y.  
1387 Demographic variation and population viability in a threatened Himalayan medicinal  
1388 and aromatic herb *Nardostachys grandiflora*: Matrix modelling of harvesting effects in  
1389 two contrasting habitats. *Journal of Applied Ecology* **45**, 41–51 (2008).
- 1390 338. Esparza-Olguín, L., Valverde, T. & Mandujano, M. C. Comparative demographic  
1391 analysis of three *Neobuxbaumia* species (Cactaceae) with differing degree of rarity.  
1392 *Population Ecology* **47**, 229–245 (2005).
- 1393 339. Godínez-Alvarez, H. & Valiente-Banuet, A. Demography of the columnar cactus  
1394 *Neobuxbaumia macrocephala*: a comparative approach using population projection  
1395 matrices. *Plant Ecology* **174**, 109–118 (2004).
- 1396 340. Arroyo-Cosultchi, G., Golubov, J. & Mandujano, M. C. Pulse seedling recruitment on  
1397 the population dynamics of a columnar cactus: Effect of an extreme rainfall event.  
1398 *Acta Oecologica* **71**, 52–60 (2016).
- 1399 341. Godínez-Alvarez, H., Valiente-banuet, A. & rojas-Martínez, A. The role of seed  
1400 dispersers in the population dynamics of the columnar cactus *Neobuxbaumia tetetzo*.  
1401 *Ecology* **83**, 2617–2629 (2002).
- 1402 342. Shefferson, R. P. & Tali, K. Dormancy is associated with decreased adult survival in  
1403 the burnt orchid, *Neotinea ustulata*. *Journal of Ecology* **95**, 217–225 (2007).
- 1404 343. Thomson, D. M. Matrix models as a tool for understanding invasive plant and native  
1405 plant interactions. *Conservation Biology* **19**, 917–928 (2005).
- 1406 344. Gross, C. L. & Mackay, D. Two decades of demography reveals that seed and seedling  
1407 transitions limit population persistence in a translocated shrub. *Annals of Botany* **114**,  
1408 85–96 (2014).

- 1409 345. García-González, A. *et al.* Impact of different shade coffee management scenarios, on  
1410 a population of *Oncidium poikilostalix* (Orchidaceae), in Soconusco, Chiapas, Mexico.  
1411 *Plant Ecology & Diversity* **10**, 185–196 (2017).
- 1412 346. Raventós, J., García-González, A., Riverón-Giró, F. B. & Damon, A. Comparison of  
1413 transient and asymptotic perturbation analyses of three epiphytic orchid species  
1414 growing in coffee plantations in Mexico: Effect on conservation decisions. *Plant*  
1415 *Ecology & Diversity* **11**, 133–145 (2018).
- 1416 347. Mandujano, M. C., Golubov, J. & Huenneke, L. F. Effect of reproductive modes and  
1417 environmental heterogeneity in the population dynamics of a geographically  
1418 widespread clonal desert cactus. *Population Ecology* **49**, 141–153 (2007).
- 1419 348. Haridas, C. v., Keeler, K. H. & Tenhumberg, B. Variation in the local population  
1420 dynamics of the short-lived *Opuntia macrorhiza* (Cactaceae). *Ecology* **96**, 800–807  
1421 (2015).
- 1422 349. Mandujano, M. C., Montana, C., Franco, M., Golubov, J. & Flores-Martínez, A.  
1423 Integration of demographic annual variability in a clonal desert cactus. *Ecology* **82**,  
1424 344–359 (2001).
- 1425 350. Jacquemyn, H., Brys, R. & Jongejans, E. Seed limitation restricts population growth in  
1426 shaded populations of a perennial woodland orchid. *Ecology* **91**, 119–129 (2010).
- 1427 351. Lucas, R. W., Forseth, I. N. & Casper, B. B. Using rainout shelters to evaluate climate  
1428 change effects on the demography of *Cryptantha flava*. *Journal of Ecology* **96**, 514–  
1429 522 (2008).
- 1430 352. Berg, H. Population dynamics in *Oxalis acetosella*: The significance of sexual  
1431 reproduction in a clonal, cleistogamous forest herb. *Ecography* **25**, 233–243 (2002).

- 1432 353. Morales-Romero, D., Godínez-Álvarez, H., Campo-Alves, J. & Molina-Freaner, F.  
1433 Effects of land conversion on the regeneration of *Pachycereus pecten-aboriginum* and  
1434 its consequences on the population dynamics in northwestern Mexico. *Journal of Arid*  
1435 *Environments* **77**, 123–129 (2012).
- 1436 354. Andrieu, E. *et al.* Population dynamics of *Paeonia officinalis* in relation to forest  
1437 closure: From model predictions to practical conservation management. *Biological*  
1438 *Conservation* **215**, 51–60 (2017).
- 1439 355. Ishihama, F., Fujii, S., Yamamoto, K. & Takada, T. Estimation of dieback process  
1440 caused by herbivory in an endangered root-sprouting shrub species, *Paliurus*  
1441 *ramosissimus* (Lour.) Poir., using a shoot-dynamics matrix model. *Population Ecology*  
1442 **56**, 275–288 (2014).
- 1443 356. Raghu, S., Wilson, J. R. & Dhileepan, K. Refining the process of agent selection  
1444 through understanding plant demography and plant response to herbivory. *Australian*  
1445 *Journal of Entomology* **45**, 308–316 (2006).
- 1446 357. Hoffmann, W. A. & Solbrig, O. T. The role of topkill in the differential response of  
1447 savanna woody species to fire. *Forest Ecology and Management* **180**, 273–286 (2003).
- 1448 358. Ticktin, T., Ganesan, R., Paramesha, M. & Setty, S. Disentangling the effects of  
1449 multiple anthropogenic drivers on the decline of two tropical dry forest trees. *Journal*  
1450 *of Applied Ecology* **49**, 774–784 (2012).
- 1451 359. Thomas, A. G. & Dale, H. M. The role of seed reproduction in the dynamics of  
1452 established populations of *Hieracium floribundum* and a comparison with that of  
1453 vegetative reproduction. *Canadian Journal of Botany* **53**, 3022–3031 (1975).

- 1454 360. Svensson, B. M., Carlsson, B. A., Karlsson, P. S. & Nordell, K. O. Comparative long-  
1455 term demography of three species of *Pinguicula*. *Journal of Ecology* **81**, 635–645  
1456 (1993).
- 1457 361. López-Mata, L. The impact of seed extraction on the population dynamics of *Pinus*  
1458 *maximartinezii*. *Acta Oecologica* **49**, 39–44 (2013).
- 1459 362. Buckley, Y. M. *et al.* Slowing down a pine invasion despite uncertainty in demography  
1460 and dispersal. *Journal of Applied Ecology* **42**, 1020–1030 (2005).
- 1461 363. Münzbergová, Z., Hadincová, V., Wild, J. & Kindlmannová, J. Variability in the  
1462 contribution of different life stages to population growth as a key factor in the invasion  
1463 success of *Pinus strobus*. *PLoS ONE* **8**, 1–12 (2013).
- 1464 364. Gornish, E. S. Effects of density and fire on the vital rates and population growth of a  
1465 perennial goldenaster. *AoB Plants* **5**, 1–11 (2013).
- 1466 365. Villellas, J., Ehrlén, J., Olesen, J. M., Braza, R. & García, M. B. Plant performance in  
1467 central and northern peripheral populations of the widespread *Plantago coronopus*.  
1468 *Ecography* **36**, 136–145 (2013).
- 1469 366. Reddoch, J. M. & Reddoch, A. H. Population ecology of *Platanthera hookeri*  
1470 (Orchidaceae) in southwestern Quebec, Canada. *Journal of the Torrey Botanical*  
1471 *Society* **134**, 369–378 (2007).
- 1472 367. Hill Bermingham, L. Deer herbivory and habitat type influence long-term population  
1473 dynamics of a rare wetland plant. *Plant Ecology* **210**, 359–378 (2010).
- 1474 368. Eriksson, O. Ramet behaviour and population growth in the clonal herb *Potentilla*  
1475 *anserina*. *Journal of Ecology* **76**, 522–536 (1988).

- 1476 369. Lesica, P. & Ellis, M. Demography of sulfur cinquefoil (*Potentilla recta*) in a northern  
1477 rocky mountain grassland. *Invasive Plant Science and Management* **3**, 139–147  
1478 (2010).
- 1479 370. Jacquemyn, H. & Brys, R. Effects of stand age on the demography of a temperate  
1480 forest herb in post-agricultural forests. *Ecology* **89**, 3480–3489 (2008).
- 1481 371. Toräng, P., Ehrlén, J. & Ågren, J. Habitat quality and among-population differentiation  
1482 in reproductive effort and flowering phenology in the perennial herb *Primula farinosa*.  
1483 *Evolutionary Ecology* **24**, 715–729 (2010).
- 1484 372. Ehrlén, J., Syrjänen, K., Leimu, R., Garcia, M. B. & Lehtilä, K. Land use and  
1485 population growth of *Primula veris*: An experimental demographic approach. *Journal*  
1486 *of Applied Ecology* **42**, 317–326 (2005).
- 1487 373. Endels, P., Jacquemyn, H., Brys, R. & Hermy, M. Rapid response to habitat restoration  
1488 by the perennial *Primula veris* as revealed by demographic monitoring. *Plant Ecology*  
1489 **176**, 143–156 (2005).
- 1490 374. Valverde, T. & Silvertown, J. Variation in the demography of a woodland understorey  
1491 herb “*Primula vulgaris*” along the forest regeneration cycle: Projection matrix analysis.  
1492 *Journal of Ecology* **86**, 545–562 (1998).
- 1493 375. Condit, R., Hubbell, S. P. & Foster, R. B. Mortality and growth of a commercial  
1494 hardwood “el cativo”, *Prioria copaifera*, in Panama. *Forest Ecology and Management*  
1495 **62**, 107–122 (1993).
- 1496 376. Jackson, M. M., Pearson, S. M. & Turner, M. G. Performance and population  
1497 dynamics of a native understory herb differ between young and old forest stands in the  
1498 Southern Appalachians. *Forest Ecology and Management* **304**, 444–454 (2013).

- 1499 377. Golubov, J. *et al.* Demography of the invasive woody perennial *Prosopis glandulosa*  
1500 (honey mesquite). *Journal of Ecology* **87**, 955–962 (1999).
- 1501 378. Bernal, R. Demografía de *Prosopis laevigata*, principal hospedero de *Tillandsia*  
1502 *recurvata*. (2004).
- 1503 379. Stewart, K. M. The commercial bark harvest of the african cherry (*Prunus africana*) on  
1504 mount oku, Cameroon: Effects on traditional uses and population dynamics. (Florida  
1505 International University, 2001).
- 1506 380. Sebert-Cuvillier, E. *et al.* Local population dynamics of an invasive tree species with a  
1507 complex life-history cycle: A stochastic matrix model. *Ecological Modelling* **201**,  
1508 127–143 (2007).
- 1509 381. Durán, R. Variabilidad Demográfica y Dinámica Poblacional de *Pseudophoenix*  
1510 *sargentii* en la Península de Yucatán. (UACPyP, UNAM, Mexico, 1992).
- 1511 382. Méndez, M., Durán, R., Olmsted, I. & Oyama, K. Population dynamics of *Pterocereus*  
1512 *gaumeri*, a rare and endemic columnar cactus of Mexico. *BIOTROPICA* **36**, 492–504  
1513 (2004).
- 1514 383. Liddle, D. T., Brook, B. W., Matthews, J., Taylor, S. M. & Caley, P. Threat and  
1515 response: A decade of decline in a regionally endangered rainforest palm affected by  
1516 fire and introduced animals. *Biological Conservation* **132**, 362–375 (2006).
- 1517 384. Maschinski, J., Baggs, J. E., Quintana-Ascencio, P. F. & Menges, E. S. Using  
1518 population viability analysis to predict the effects of climate change on the extinction  
1519 risk of an endangered limestone endemic shrub, Arizona cliffrose. *Conservation*  
1520 *Biology* **20**, 218–228 (2006).

- 1521 385. Xavier Picó, F. & Riba, M. Regional-scale demography of *Ramonda myconi*: Remnant  
1522 population dynamics in a preglacial relict species. *Plant Ecology* **161**, 1–13 (2002).
- 1523 386. Sarukhan, J. & Harper, J. L. Studies on plant demography: *Ranunculus repens* L., *R.*  
1524 *bulbosus* L. and *R. acris* L.: I. Population flux and survivorship. *Journal of Ecology* **61**,  
1525 675 (1973).
- 1526 387. McGraw, J. B. Effects of age and size on life histories and population growth of  
1527 *Rhododendron maximum* shoots. *American Journal of Botany* **76**, 113–123 (1989).
- 1528 388. Salguero-Gómez R. Markov Chains applied to *Rhododendron ponticum* L.: ecological  
1529 terminator in Great Britain... ecologically terminated in Spain? (Kingston University  
1530 of London Press, 2004).
- 1531 389. Enright, N. J. & Watson, A. D. Population dynamics of the nikau palm, *Rhopalostylis*  
1532 *sapida* (Wendl. et Drude), in a temperate forest remnant near Auckland, New Zealand.  
1533 *New Zealand Journal of Botany* **30**, 29–43 (1992).
- 1534 390. Thaxton, J. M. Effects of fire intensity on groundcover shrubs in a frequently burned  
1535 longleaf pine savanna. (Louisiana State University, 2003).
- 1536 391. Lambrecht-McDowell, S. C. & Radosevich, S. R. Population demographics and trade-  
1537 offs to reproduction of an invasive and noninvasive species of *Rubus*. *Biological*  
1538 *Invasions* **7**, 281–295 (2005).
- 1539 392. Eriksson, O. Stochastic population dynamics of clonal plants: Numerical experiments  
1540 with ramet and genet models. *Ecological Research* **9**, 257–268 (1994).
- 1541 393. Strazisar, T., Koch, M. S. & Madden, C. J. Seagrass (*Ruppia maritima* L.) life history  
1542 transitions in response to salinity dynamics along the Everglades-Florida Bay ecotone.  
1543 *Estuaries and Coasts* **38**, 337–352 (2015).

- 1544 394. Tolvanen, A., Schroderus, J. & Henry, G. H. R. Age- and stage-based bud demography  
1545 of *Salix arctica* under contrasting muskox grazing pressure in the High Arctic. in  
1546 *Ecology and Evolutionary Biology of Clonal Plants*. (eds. Stuefer, J. F., Erschbamer,  
1547 B., Huber, H. & Suzuki, J. I.) 221–240 (Springer Netherlands, 2002). doi:10.1007/978-  
1548 94-017-1345-0\_12.
- 1549 395. Csergő, A., Molnár, E. & García, M. B. Dynamics of isolated *Saponaria bellidifolia*  
1550 Sm. populations at northern range periphery. *Population Ecology* **53**, 393–403 (2011).
- 1551 396. Salinas, M. J., Suárez, V. & Blanca, G. Demographic structure of three species of  
1552 *Sarcocapnos* (Fumariaceae) as a basis for their conservation. *Canadian Journal of*  
1553 *Botany* **80**, 360–369 (2002).
- 1554 397. Tendland, Y. Impact de la récolte sur la survie et la croissance de deux plantes  
1555 médicinales crie, *Sarracenia purpurea* et *Rhododendron groenlandicum*, dans le nord  
1556 du Québec. (Unknown, 2011).
- 1557 398. Gotelli, N. J. & Ellison, A. M. Forecasting extinction risk with nonstationary matrix  
1558 models. *Ecological Applications* **16**, 51–61 (2006).
- 1559 399. Law, W., Salick, J. & Knight, T. M. The effects of pollen limitation on population  
1560 dynamics of snow lotus (*Saussurea medusa* and *S. laniceps*, Asteraceae): Threatened  
1561 Tibetan medicinal plants of the eastern Himalayas. *Plant Ecology* **210**, 343–357  
1562 (2010).
- 1563 400. Dinnétz, P. & Nilsson, T. Population viability analysis of *Saxifraga cotyledon*, a  
1564 perennial plant with semelparous rosettes. *Plant Ecology* **159**, 61–71 (2002).



- 1565 401. Yamada, T. *et al.* Strong habitat preference of a tropical rain forest tree does not imply  
1566 large differences in population dynamics across habitats. *Journal of Ecology* **95**, 332–  
1567 342 (2007).
- 1568 402. Münzbergová, Z. Effect of population size on the prospect of species survival. *Folia*  
1569 *Geobotanica* **41**, 137–150 (2006).
- 1570 403. Pellegrino, G. & Bellusci, F. Effects of human disturbance on reproductive success and  
1571 population viability of *Serapias cordigera* (Orchidaceae). *Botanical Journal of the*  
1572 *Linnean Society* **176**, 408–420 (2014).
- 1573 404. Yamada, T., Yamada, Y., Okuda, T. & Fletcher, C. Soil-related variations in the  
1574 population dynamics of six dipterocarp tree species with strong habitat preferences.  
1575 *Oecologia* **172**, 713–724 (2013).
- 1576 405. Morris, W. F. & Doak, D. F. Life history of the long-lived gynodioecious cushion  
1577 plant *Silene acaulis* (Caryophyllaceae), inferred from size-based population projection  
1578 matrices. *American Journal of Botany* **85**, 784–793 (1998).
- 1579 406. Giménez-Benavides, L., Albert, M. J., Iriondo, J. M. & Escudero, A. Demographic  
1580 processes of upward range contraction in a long-lived Mediterranean high mountain  
1581 plant. *Ecography* **34**, 85–93 (2011).
- 1582 407. Kephart, S. R. & Paladino, C. Demographic change and microhabitat variability in a  
1583 grassland endemic, *Silene douglasii* var. *oraria* (Caryophyllaceae). *American Journal*  
1584 *of Botany* **84**, 179–189 (1997).
- 1585 408. Lesica, P. & Crone, E. E. Causes and consequences of prolonged dormancy for an  
1586 iteroparous geophyte, *Silene spaldingii*. *Journal of Ecology* **95**, 1360–1369 (2007).

- 1587 409. Silva, J. L., Mejías, J. A. & García, M. B. Demographic vulnerability in cliff-dwelling  
1588 Sonchus species endemic to the western Mediterranean. *Basic and Applied Ecology*  
1589 **16**, 316–324 (2015).
- 1590 410. Hastings, A., Hall, R. J. & Taylor, C. M. A simple approach to optimal control of  
1591 invasive species. *Theoretical Population Biology* **70**, 431–435 (2006).
- 1592 411. Falcón, W., Ackerman, J. D. & Tremblay, R. L. Quantifying how acquired interactions  
1593 with native and invasive insects influence population growth rates of a non-indigenous  
1594 plant. *Biological Invasions* **19**, 895–911 (2017).
- 1595 412. Wallin, L. & Svensson, B. M. Reinforced traditional management is needed to save a  
1596 declining meadow species. A demographic analysis. *Folia Geobotanica* **47**, 231–247  
1597 (2012).
- 1598 413. Mildén, M. Local and regional dynamics of *Succisa pratensis*. (Stockholm University,  
1599 2005).
- 1600 414. Pavlik, B. M. & Barbour, M. G. Demographic monitoring of endemic sand dune  
1601 plants, Eureka Valley, California. *Biological Conservation* **46**, 217–242 (1988).
- 1602 415. Verwer, C., Peña-Claros, M., van der Staak, D., Ohlson-Kiehn, K. & Sterck, F. J.  
1603 Silviculture enhances the recovery of overexploited mahogany *Swietenia macrophylla*.  
1604 *Journal of Applied Ecology* **45**, 1770–1779 (2008).
- 1605 416. Schmidt, I. B. & Ticktin, T. When lessons from population models and local  
1606 ecological knowledge coincide – Effects of flower stalk harvesting in the Brazilian  
1607 savanna. *Biological Conservation* **152**, 187–195 (2012).

- 1608 417. Brown, K. A., Spector, S. & Wu, W. Multi-scale analysis of species introductions:  
1609 Combining landscape and demographic models to improve management decisions  
1610 about non-native species. *Journal of Applied Ecology* **45**, 1639–1648 (2008).
- 1611 418. Campbell, L. G. & Husband, B. C. Impact of clonal growth on effective population  
1612 size in *Hymenoxys herbacea* (Asteraceae). *Heredity (Edinb)* **94**, 526–532 (2005).
- 1613 419. Mondragón, D., Durán, R., Ramírez, I. & Valverde, T. Temporal variation in the  
1614 demography of the clonal epiphyte *Tillandsia brachycaulos* (Bromeliaceae) in the  
1615 Yucatán Peninsula, Mexico. *Journal of Tropical Ecology* **20**, 189–200 (2004).
- 1616 420. Mondragon, D. C. & Ticktin, T. Demographic effects of harvesting epiphytic  
1617 bromeliads and an alternative approach to collection. *Conservation Biology* **25**, 797–  
1618 807 (2011).
- 1619 421. Toledo-Aceves, T., Hernández-Apolinar, M. & Valverde, T. Potential impact of  
1620 harvesting on the population dynamics of two epiphytic bromeliads. *Acta Oecologica*  
1621 **59**, 52–61 (2014).
- 1622 422. Calvo, R. N. Evolutionary demography of orchids: Intensity and frequency of  
1623 pollination and the cost of fruiting. *Ecology* **74**, 1033–1042 (1993).
- 1624 423. Milden, M., Cousins, S. A. & Eriksson, O. The distribution of four grassland plant  
1625 species in relation to landscape history in a Swedish rural area. *Annales Botanici*  
1626 *Fennici* **44**, 416–426 (2007).
- 1627 424. Ohara, M., Tomimatsu, H., Takada, T. & Kawano, S. Importance of life history studies  
1628 for conservation of fragmented populations: A case study of the understory herb,  
1629 *Trillium camschatcense*. *Plant Species Biology* **21**, 1–12 (2006).

- 1630 425. Knight, T. M. Effects of herbivory and its timing across populations of *Trillium*  
1631 *grandiflorum* (Liliaceae). *American Journal of Botany* **90**, 1207–1214 (2003).
- 1632 426. Scanga, S. E. & Leopold, D. J. Managing wetland plant populations: Lessons learned  
1633 in Europe may apply to North American fens. *Biological Conservation* **148**, 69–78  
1634 (2012).
- 1635 427. Lamar, W. R. & McGraw, J. B. Evaluating the use of remotely sensed data in matrix  
1636 population modeling for eastern hemlock (*Tsuga canadensis* L.). *Forest Ecology and*  
1637 *Management* **212**, 50–64 (2005).
- 1638 428. Yates, C. J., Ladd, P. G., Coates, D. J. & McArthur, S. Hierarchies of cause:  
1639 Understanding rarity in an endemic shrub *Verticordia staminosa* (Myrtaceae) with a  
1640 highly restricted distribution. *Australian Journal of Botany* **55**, 194 (2007).
- 1641 429. Milbrath, L. R., Davis, A. S. & Biazzo, J. Identifying critical life stage transitions for  
1642 biological control of long-lived perennial *Vincetoxicum* species. *Journal of Applied*  
1643 *Ecology* **55**, 1465–1475 (2018).
- 1644 430. Eckstein, R. L., Danihelka, J. & Otte, A. Variation in life-cycle between three rare and  
1645 endangered floodplain violets in two regions: Implications for population viability and  
1646 conservation. *Biologia (Bratisl)* **64**, 69 (2009).
- 1647 431. Solbrig, O. T., Sarandon, R. & Bossert, W. A density-dependent growth model of a  
1648 perennial herb, *Viola fimbriatula*. *The American Naturalist* **131**, 385–400 (1988).
- 1649 432. Zotz, G. Differences in vital demographic rates in three populations of the epiphytic  
1650 bromeliad, *Werauhia sanguinolenta*. *Acta Oecologica* **28**, 306–312 (2005).

- 1651 433. Shriver, R. K., Cutler, K. & Doak, D. F. Comparative demography of an epiphytic  
1652 lichen: Support for general life history patterns and solutions to common problems in  
1653 demographic parameter estimation. *Oecologia* **170**, 137–146 (2012).
- 1654 434. Negrón-Ortiz, V., Gorchov, D. L. & Breckon, G. J. Population Structure in *Zamia*  
1655 (*Zamiaceae*) in Northern Puerto Rico. II. Seed germination and stage-structured  
1656 population projection. *International Journal of Plant Sciences* **157**, 605–614 (1996).
- 1657 435. Octavio-Aguilar, P., Rivera-Fernández, A., Iglesias-Andreu, L. G., Vovides, P. A. &  
1658 de Cáceres-González, F. F. Extinction risk of *Zamia inermis*: a demographic study in  
1659 its single natural population. *Biodiversity and Conservation* **26**, 787–800 (2017).
- 1660 436. Sánchez-Velásquez, L. R., Ezcurra, E., Martínez-Ramos, M., Álvarez-Buylla, E. &  
1661 Lorente, R. Population dynamics of *Zea diploperennis*, an endangered perennial herb:  
1662 Effect of slash and burn practice. *Journal of Ecology* **90**, 684–692 (2002).
- 1663 437. Chamberlain, S. & Szocs, E. taxize - taxonomic search and retrieval in R. (2013).
- 1664 438. Chamberlain, S. *et al.* taxize: Taxonomic information from around the web. (2020).
- 1665 439. Michonneau, F., Brown, J. & Winter, D. rotl: An R package to interact with the Open  
1666 Tree of Life data. *Methods in Ecology and Evolution* **7**, 1–17 (2016).
- 1667 440. Hinchliff, C. E. *et al.* Synthesis of phylogeny and taxonomy into a comprehensive tree  
1668 of life. *Proceedings of the National Academy of Sciences* **112**, 12764–12769 (2015).
- 1669 441. Revell, L. J. phytools: An R package for phylogenetic comparative biology (and other  
1670 things). *Methods in Ecology and Evolution* **3**, 217–223 (2012).
- 1671 442. Paradis, E. & Schliep, K. ape 5.0: an environment for modern phylogenetics and  
1672 evolutionary analyses in R. *Bioinformatics* **35**, (2018).

- 1673 443. Grafen, A. The phylogenetic regression. *Philosophical Transactions of the Royal*  
1674 *society of London. Series B. Biological Sciences* **326**, 119–157. (1989).
- 1675 444. Revell, L. J., Harmon, L. J. & Collar, D. C. Phylogenetic signal, evolutionary process,  
1676 and rate. *Syst Biol* **57**, 591–601 (2008).
- 1677 445. Revell, L. J. Phylogenetic signal and linear regression on species data. *Methods in*  
1678 *Ecology and Evolution* **1**, 319–329 (2010).
- 1679 446. Karger, D. N. *et al.* Climatologies at high resolution for the earth’s land surface areas.  
1680 *Scientific Data* **4**, 1–20 (2017).
- 1681 447. Cavender-Bares, J., Ackerly, D. D., Hobbie, S. E. & Townsend, P. A. Evolutionary  
1682 legacy effects on ecosystems: Biogeographic origins, plant traits, and implications for  
1683 management in the era of global change. *Annual Review of Ecology, Evolution, and*  
1684 *Systematics* **47**, 433–462 (2016).
- 1685 448. Pilowsky, J. colorednoise: Simulate temporally autocorrelated populations. (2019).
- 1686 449. Ruokolainen, L., Lindén, A., Kaitala, V. & Fowler, M. S. Ecological and evolutionary  
1687 dynamics under coloured environmental variation. *Trends in Ecology and Evolution*  
1688 **24**, 555–563 (2009).
- 1689 450. Vasseur, D. A. & Yodzis, P. The color of environmental noise. *Ecology* **85**, 1146–1152  
1690 (2004).
- 1691 451. R Core Team. R: A language and environment for statistical computing. (2019).
- 1692 452. Schroeder, M. A. Diagnosing and dealing with multicollinearity. *Western Journal of*  
1693 *Nursing Research* **12**, 175–187 (1990).

- 1694 453. Mansfield, E. R. & Helms, B. P. Detecting multicollinearity. *The American Statistician*  
1695 **36**, 158–160 (1982).
- 1696 454. Barbosa, A. M. fuzzySim: Applying fuzzy logic to binary similarity indices in ecology.  
1697 *Methods in Ecology and Evolution* **6**, 853–858 (2015).
- 1698 455. Gilljam, D. *et al.* The colour of environmental fluctuations associated with terrestrial  
1699 animal population dynamics. *Global Ecology and Biogeography* **28**, 118–130 (2019).
- 1700 456. Pagel, M. Inferring the historical patterns of biological evolution. *Nature* **401**, 877–884  
1701 (1999).
- 1702 457. Goolsby, E. W., Bruggeman, J. & Ané, C. Rphylopars: fast multivariate phylogenetic  
1703 comparative methods for missing data and within-species variation. *Methods in*  
1704 *Ecology and Evolution* **8**, 22–27 (2017).
- 1705 458. Robert, A., Sarrazin, F., Couvet, D. & Legendre, S. Releasing adults versus young in  
1706 reintroductions: Interactions between demography and genetics. *Conservation Biology*  
1707 **18**, 1078–1087 (2004).
- 1708 459. Metcalf, C. J. E., McMahon, S. M., Salguero-Gómez, R. & Jongejans, E. IPMpack: An  
1709 R package for integral projection models. *Methods in Ecology and Evolution* **4**, 195–  
1710 200 (2013).
- 1711 460. Evers, S. *et al.* Lagged and dormant-season climate better predict plant vital rates than  
1712 climate during the growing season. *Global Change Biology* **27**, 1927–1941 (2021).
- 1713 461. Karger, D. N. & Zimmermann, N. E. CHELSAcruts - High resolution temperature and  
1714 precipitation timeseries for the 20th century and beyond. *EnviDat* (2018).

1715
